# Supplementary material
Source: publisher figshare collection journal article supplement (https://geolsoc.figshare.com/ndownloader/files/14074847)
Supplement: Supplementary file 1 [file 14074847]

## Sheet: zircon table
Grain	Pb (ppm)	U (ppm)	Th/U	207Pb/235U	± 2s	206Pb/238U	± 2s	ρ	238U/206Pb	± 2s	207Pb/206Pb	± 2s	206Pb/238U age	± 2s	207Pb/235U age	± 2s	207Pb/206Pb age	± 2s	Concord	Preferred Age	± 2s
7119/12-2 1658.4, Nordmela Formation, Hammerfest Basin
188_047	1498.37	224.606	0.164999	3.40075	0.0596593	0.1499	0.00248	0.943075	6.67111	0.110369	0.16454	0.00192	900.4	13.92	1504.57	26.3946	2502.8	19.54	35.9757
188_115	649.27	98.7799	0.584236	2.75177	0.057619	0.15214	0.0028	0.878944	6.57289	0.120968	0.13118	0.00262	913	15.72	1342.57	28.1119	2113.8	34.72	43.1924
188_070	620.709	83.2247	0.569993	1.88493	0.0354793	0.13408	0.0023	0.911347	7.45823	0.127938	0.10196	0.00158	811.1	13.02	1075.8	20.2494	1660.1	28.52	48.8585
188_099	661.162	40.4895	0.2601	0.540148	0.0126947	0.06124	0.00116	0.805957	16.3292	0.309305	0.06397	0.00178	383.2	7.06	438.522	10.3063	740.7	58.42	51.7348
188_046	1113.56	150.309	0.0704675	1.7928	0.0339054	0.13498	0.00232	0.908828	7.4085	0.127335	0.09633	0.00152	816.2	13.18	1042.84	19.7223	1554.3	29.48	52.5124
188_023	184.907	29.5279	0.410913	2.26522	0.0518861	0.15969	0.00312	0.852973	6.26213	0.122349	0.10288	0.00246	955.1	17.38	1201.53	27.5217	1676.7	43.82	56.9631
188_136	187.794	14.0019	0.640847	0.678091	0.0150263	0.07456	0.00136	0.823132	13.412	0.24464	0.06596	0.00166	463.5	8.2	525.62	11.6476	805	52.14	57.5776
188_075	384.108	106.037	0.28929	6.09696	0.110407	0.27606	0.00466	0.932181	3.6224	0.0611475	0.16018	0.0021	1571.5	23.58	1989.81	36.0325	2457.6	22.02	63.9445
188_035	455.057	46.5205	0.139755	1.00543	0.0210294	0.10223	0.00184	0.860525	9.78186	0.17606	0.07133	0.00152	627.5	10.76	706.563	14.7784	966.8	42.56	64.9048
188_086	392.387	82.978	0.174474	3.35544	0.0654522	0.21147	0.00372	0.901819	4.7288	0.0831851	0.11508	0.00194	1236.6	19.82	1494.06	29.1436	1881.1	30.36	65.7381
188_133	408.238	59.2312	0.225168	1.67422	0.0306371	0.14509	0.00242	0.911469	6.89227	0.114958	0.08369	0.00126	873.4	13.6	998.789	18.2772	1285.2	29.4	67.9583
188_116	13883.2	1566.03	3.03429	1.11436	0.0188392	0.1128	0.0018	0.943903	8.86525	0.141467	0.07165	0.0008	689	10.48	760.272	12.853	975.9	23.12	70.6015
188_100	172.686	61.3139	0.392079	8.90112	0.159199	0.35506	0.00594	0.935382	2.81643	0.0471176	0.18182	0.0023	1958.7	28.24	2327.92	41.6354	2669.5	20.86	73.3733
188_032	327.165	107.143	0.300696	7.31997	0.126229	0.32749	0.00538	0.952653	3.05353	0.0501633	0.16211	0.0017	1826.2	26.12	2151.25	37.0971	2477.7	17.74	73.7055
188_020	345.127	117.284	0.248957	7.82304	0.134626	0.33983	0.00558	0.954154	2.94265	0.0483182	0.16696	0.00172	1885.8	26.86	2210.86	38.0466	2527.4	17.3	74.6142
188_113	492.833	159.501	0.289029	6.84792	0.118871	0.32364	0.00528	0.939842	3.08985	0.0504092	0.15346	0.00182	1807.5	25.66	2091.94	36.3134	2384.9	20.16	75.7893
188_102	189.973	73.8047	0.358964	9.7239	0.241994	0.3885	0.00848	0.877083	2.574	0.0561841	0.18153	0.00434	2115.9	39.4	2408.97	59.9509	2666.9	39.28	79.3393
188_062	449.077	130.758	0.292123	5.13394	0.105537	0.29117	0.00536	0.895496	3.43442	0.0632225	0.12788	0.00234	1647.4	26.78	1841.74	37.8602	2069.1	31.94	79.6192
188_126	35.0148	5.35586	0.667277	1.64187	0.0604054	0.15296	0.00414	0.735672	6.53766	0.176948	0.07785	0.00388	917.6	23.14	986.43	36.2914	1143	97.54	80.28
188_095	225.55	82.4633	0.274466	8.26729	0.145411	0.36561	0.00604	0.939259	2.73515	0.0451857	0.164	0.00198	2008.7	28.54	2260.74	39.7635	2497.3	20.34	80.4349
188_132	194.186	24.6519	0.530753	1.2398	0.0249034	0.12695	0.00222	0.87059	7.87712	0.137749	0.07083	0.0014	770.4	12.66	818.791	16.4467	952.6	40.26	80.8734
188_096	520.138	103.528	0.168155	2.46362	0.0431782	0.19904	0.00326	0.934513	5.02412	0.0822881	0.08977	0.00112	1170.1	17.52	1261.42	22.1082	1420.7	23.86	82.3608
188_060	413.095	146.269	0.922248	7.04725	0.121025	0.35408	0.00578	0.950537	2.82422	0.0461026	0.14435	0.00154	1954.1	27.52	2117.41	36.3632	2280	18.42	85.7061
188_052	219.892	61.7172	0.460284	4.40044	0.0846359	0.28067	0.00492	0.911403	3.5629	0.0624558	0.11371	0.0018	1594.7	24.78	1712.42	32.9359	1859.6	28.46	85.755
188_045	288.139	116.771	0.177492	9.11023	0.156811	0.40526	0.00664	0.951888	2.46755	0.0404297	0.16304	0.00172	2193.2	30.5	2349.14	40.435	2487.4	17.78	88.1724
188_008	172.916	9.76283	0.129054	0.421153	0.0127111	0.05646	0.00124	0.727673	17.7117	0.388991	0.0541	0.00224	354.1	7.52	356.875	10.7711	374.9	91.9	94.4519	354.1	7.52
188_084	5693.58	379.136	6.66798	0.508376	0.00912939	0.06659	0.0011	0.91987	15.0173	0.24807	0.05537	0.00078	415.6	6.6	417.356	7.49487	427	30.96	97.3302	415.6	6.6
188_021	30.5071	2.15746	0.0433478	0.546634	0.0328148	0.07072	0.00268	0.631276	14.1403	0.535859	0.05606	0.00522	440.5	16.14	442.789	26.5809	454.4	200.78	96.941	440.5	16.14
188_044	385.404	27.3059	0.450595	0.543634	0.0107451	0.07085	0.00122	0.871196	14.1143	0.243041	0.05565	0.00108	441.3	7.36	440.818	8.71291	438.1	42.28	100.73	441.3	7.36
188_085	379.349	26.8958	0.321151	0.567479	0.0133316	0.0709	0.00134	0.804501	14.1044	0.266571	0.05805	0.00162	441.6	8.04	456.383	10.7216	531.3	61.64	83.1169	441.6	8.04
188_083	343.91	24.4589	0.702237	0.547078	0.0114413	0.07112	0.00126	0.847132	14.0607	0.249108	0.05579	0.00124	442.9	7.54	443.081	9.26639	443.8	47.96	99.7972	442.9	7.54
188_029	243.367	17.3496	0.569011	0.546027	0.011702	0.07129	0.00128	0.837792	14.0272	0.251856	0.05555	0.0013	443.9	7.7	442.39	9.48093	434.2	50.82	102.234	443.9	7.7
188_028	112.662	8.29076	0.6921	0.569224	0.0345643	0.07359	0.00284	0.635557	13.5888	0.524422	0.0561	0.00526	457.8	17.02	457.512	27.781	456.1	202.5	100.373	457.8	17.02
188_066	543.399	40.1572	0.0241745	0.572946	0.0111621	0.0739	0.00126	0.875173	13.5318	0.230718	0.05623	0.00106	459.6	7.58	459.918	8.9601	460.8	41.4	99.7396	459.6	7.58
188_105	212.442	15.8184	0.397364	0.575337	0.0141405	0.07446	0.00144	0.786859	13.43	0.259727	0.05604	0.0017	462.9	8.58	461.46	11.3417	453.7	66.08	102.028	462.9	8.58
188_071	163.614	12.505	0.177392	0.59509	0.0140915	0.07643	0.00144	0.795655	13.0839	0.24651	0.05647	0.00162	474.8	8.68	474.113	11.2268	470	63.72	101.021	474.8	8.68
188_120	422.994	34.3386	0.28553	0.644163	0.0136676	0.08118	0.00144	0.836021	12.3183	0.218507	0.05755	0.00134	503.1	8.62	504.88	10.7123	512.4	50.44	98.185	503.1	8.62
188_053	283.11	25.8054	0.837497	0.747405	0.019556	0.09115	0.00184	0.771501	10.9709	0.221465	0.05947	0.00198	562.3	10.92	566.717	14.8283	584.3	71.7	96.2348	562.3	10.92
188_049	95.8241	8.89343	0.508681	0.75385	0.0194721	0.09281	0.00186	0.775872	10.7747	0.215935	0.05891	0.00192	572.1	10.94	570.456	14.735	563.8	69.88	101.472	572.1	10.94
188_127	422.942	39.7269	0.317843	0.769941	0.0157929	0.09393	0.00164	0.851204	10.6462	0.185881	0.05945	0.00128	578.7	9.72	579.729	11.8913	583.7	46.72	99.1434	578.7	9.72
188_067	87.5953	8.51164	0.649376	0.800653	0.0206013	0.09717	0.00194	0.775923	10.2912	0.205465	0.05976	0.00194	597.8	11.46	597.197	15.3663	594.6	70.26	100.538	597.8	11.46
188_030	100.377	10.0186	1.5322	0.845663	0.0217432	0.09981	0.002	0.779345	10.019	0.200762	0.06145	0.00198	613.3	11.78	622.266	15.9993	655	68.08	93.6336	613.3	11.78
188_011	808.475	60.8458	0.299463	0.598433	0.0118584	0.07526	0.0013	0.871703	13.2873	0.229517	0.05767	0.00112	467.8	7.82	476.239	9.43703	516.9	41.36	90.5011	805	52.14
188_087	330.722	44.4425	0.904755	1.28197	0.0253649	0.13438	0.00234	0.880091	7.44158	0.129583	0.06919	0.0013	812.8	13.28	837.733	16.5752	904.5	38.78	89.8618	812.8	13.28
188_050	659.968	104.321	0.0541787	1.53783	0.0271297	0.15807	0.0026	0.932369	6.32631	0.104058	0.07056	0.0009	946	14.46	945.637	16.6825	944.6	25.74	100.148	946	14.46
188_013	423.28	67.073	0.212808	1.5578	0.0295906	0.15846	0.00272	0.903661	6.31074	0.108325	0.0713	0.00116	948.2	15.12	953.593	18.1137	966	33.28	98.1573	948.2	15.12
188_036	166.2	26.7333	0.810593	1.5844	0.0472984	0.16085	0.00368	0.76638	6.21697	0.142235	0.07144	0.00274	961.5	20.4	964.098	28.7808	969.9	77.24	99.1339	961.5	20.4
188_093	97.4138	16.9977	0.195329	1.77024	0.0424978	0.17449	0.00342	0.816434	5.73099	0.112327	0.07358	0.00204	1036.8	18.82	1034.61	24.8376	1030	54.72	100.66	1036.8	18.82
188_016	107.014	18.8773	0.774905	1.79545	0.045842	0.1764	0.00364	0.808189	5.66893	0.116978	0.07382	0.00222	1047.3	19.9	1043.81	26.6508	1036.5	60.4	101.042	1047.3	19.9
188_138	33.545	5.94619	0.647553	1.8284	0.068817	0.17726	0.00488	0.73145	5.64143	0.15531	0.07481	0.00384	1052	26.7	1055.71	39.7344	1063.4	101.66	98.928	1052	26.7
188_009	137.091	24.4118	0.441063	1.82276	0.037577	0.17807	0.0032	0.8717	5.61577	0.100918	0.07424	0.0015	1056.4	17.54	1053.68	21.722	1047.9	40.32	100.811	1056.4	17.54
188_118	118.549	21.2653	0.901872	1.85571	0.0482987	0.17938	0.00372	0.796789	5.57476	0.11561	0.07503	0.00236	1063.6	20.34	1065.46	27.7309	1069.4	62.38	99.4576	1063.6	20.34
188_007	39.3308	7.12871	0.430654	1.90205	0.0556183	0.18125	0.00412	0.77736	5.51724	0.125413	0.07611	0.0028	1073.8	22.54	1081.81	31.6334	1098	72.64	97.796	1073.8	22.54
188_076	78.8883	15.0763	0.690502	2.02502	0.0436427	0.19111	0.00352	0.854626	5.23259	0.0963775	0.07685	0.00172	1127.4	19.08	1123.94	24.223	1117.4	44.42	100.895	1127.4	19.08
188_034	263.867	51.7127	0.634191	2.11985	0.0383622	0.19598	0.00328	0.924835	5.10256	0.0853985	0.07845	0.00108	1153.7	17.7	1155.29	20.9068	1158.3	27.38	99.6029	1153.7	17.7
188_088	550.545	108.644	0.147055	2.1411	0.0383007	0.19734	0.00326	0.92349	5.0674	0.0837119	0.07869	0.00108	1161	17.58	1162.18	20.7895	1164.4	26.84	99.708	1161	17.58
188_012	256.29	50.9889	0.302823	2.15911	0.0412546	0.19895	0.00344	0.904934	5.02639	0.0869102	0.07871	0.00128	1169.7	18.48	1167.99	22.317	1164.8	32.24	100.421	1169.7	18.48
188_098	551.331	109.908	0.349159	2.1717	0.0384846	0.19935	0.00328	0.928476	5.0163	0.0825356	0.07901	0.00104	1171.9	17.6	1172.02	20.7694	1172.4	25.84	99.9574	1171.9	17.6
188_065	88.3752	17.6379	0.425055	2.202	0.046805	0.19958	0.00366	0.862756	5.01052	0.0918855	0.08002	0.00172	1173.1	19.7	1181.68	25.1174	1197.4	42.28	97.9706	1173.1	19.7
188_111	169.33	34.274	0.248941	2.22904	0.0461579	0.20241	0.00364	0.86844	4.94047	0.0888459	0.07987	0.00164	1188.2	19.48	1190.22	24.6465	1193.7	40.24	99.5392	1188.2	19.48
188_082	162.827	35.1414	0.285247	2.46777	0.0468973	0.21582	0.0037	0.902126	4.63349	0.0794362	0.08293	0.00136	1259.8	19.64	1262.64	23.9951	1267.6	31.6	99.3847	1267.6	31.6
188_037	175.836	38.9669	0.347195	2.56331	0.0474379	0.22161	0.00376	0.916797	4.51243	0.0765613	0.08389	0.00124	1290.4	19.88	1290.24	23.8778	1290	28.88	100.031	1290	28.88
188_057	399.161	91.1643	0.217083	2.70534	0.0474531	0.22839	0.00376	0.938574	4.37848	0.0720831	0.08591	0.00104	1326	19.7	1329.92	23.3275	1336.2	23.56	99.2366	1336.2	23.56
188_104	56.8149	12.9322	0.379242	2.69685	0.111757	0.22762	0.00704	0.746349	4.39329	0.135879	0.08593	0.00474	1322	36.92	1327.59	55.0155	1336.6	105.08	98.9077	1336.6	105.08
188_048	665.828	155.151	0.371763	2.79167	0.0496211	0.23302	0.00386	0.931949	4.29148	0.0710888	0.08689	0.00112	1350.3	20.22	1353.31	24.0547	1358	24.64	99.433	1358	24.64
188_134	479.24	112.914	0.334413	2.83569	0.0528866	0.23561	0.00398	0.905739	4.2443	0.0716961	0.08729	0.00138	1363.8	20.72	1365.03	25.4583	1366.8	30.12	99.7805	1366.8	30.12
188_119	207.216	47.525	0.426202	2.83561	0.0524754	0.22935	0.00386	0.909452	4.36015	0.073382	0.08967	0.00138	1331.1	20.26	1365.01	25.2606	1418.4	29.04	93.8452	1418.4	29.04
188_043	32.6568	8.99793	0.688924	3.69036	0.109045	0.27553	0.00656	0.805746	3.62937	0.0864104	0.09714	0.0034	1568.8	33.16	1569.28	46.3701	1569.9	64.68	99.9299	1569.9	64.68
188_130	177.517	49.1935	0.293403	3.72617	0.0717441	0.27712	0.0048	0.899601	3.60855	0.0625037	0.09752	0.00164	1576.8	24.18	1577.01	30.3639	1577.3	31.42	99.9683	1577.3	31.42
188_058	281.701	79.1919	0.524666	3.82569	0.0672912	0.28112	0.00464	0.938378	3.5572	0.058713	0.0987	0.0012	1597	23.36	1598.17	28.1106	1599.7	22.64	99.8312	1599.7	22.64
188_018	71.1111	20.0803	0.407112	3.8662	0.0775338	0.28238	0.00508	0.897063	3.54133	0.0637083	0.0993	0.00176	1603.3	25.56	1606.65	32.2203	1611	32.96	99.522	1611	32.96
188_112	398.726	113.23	0.283499	3.89516	0.0694534	0.28398	0.0047	0.9282	3.52137	0.0582804	0.09948	0.00132	1611.4	23.56	1612.68	28.7552	1614.3	24.7	99.8204	1614.3	24.7
188_135	466.411	134.004	0.497748	3.98718	0.0704183	0.28731	0.0047	0.926249	3.48056	0.0569372	0.10065	0.00134	1628	23.56	1631.59	28.8158	1636.1	24.44	99.5049	1636.1	24.44
188_010	80.913	23.9324	0.897783	4.17895	0.0836469	0.29578	0.00532	0.898587	3.38089	0.0608099	0.10247	0.0018	1670.4	26.52	1669.9	33.4252	1669.4	32.16	100.06	1669.4	32.16
188_074	189.144	56.2097	0.247611	4.22946	0.0777161	0.29718	0.00504	0.922964	3.36496	0.0570678	0.10322	0.00146	1677.3	25.04	1679.76	30.8654	1682.7	26.16	99.6791	1682.7	26.16
188_137	192.328	57.3311	0.641058	4.24857	0.0890361	0.29809	0.00548	0.877223	3.35469	0.0616717	0.10337	0.00208	1681.8	27.16	1683.46	35.2798	1685.4	37.06	99.7864	1685.4	37.06
188_078	267.192	80.6332	0.461987	4.30158	0.0758158	0.30178	0.00498	0.936283	3.31367	0.0546825	0.10338	0.00128	1700.1	24.68	1693.66	29.851	1685.7	22.82	100.854	1685.7	22.82
188_122	259.288	80.5089	0.367803	4.55089	0.0833074	0.3105	0.00522	0.918378	3.22061	0.0541436	0.1063	0.00154	1743.2	25.68	1740.32	31.8579	1736.9	26.52	100.363	1736.9	26.52
188_101	91.2831	28.389	0.314696	4.58566	0.0926497	0.311	0.0056	0.891221	3.21543	0.0578985	0.10694	0.00196	1745.6	27.56	1746.66	35.29	1747.9	33.38	99.8684	1747.9	33.38
188_064	219.177	68.1203	0.8875	4.61742	0.0818602	0.3108	0.00516	0.936473	3.2175	0.053418	0.10775	0.00134	1744.7	25.4	1752.42	31.0679	1761.7	22.6	99.035	1761.7	22.6
188_129	123.807	38.7477	0.282574	4.66476	0.0879078	0.31297	0.00536	0.908792	3.19519	0.0547217	0.1081	0.0017	1755.3	26.28	1760.94	33.1851	1767.6	28.62	99.3041	1767.6	28.62
188_051	214.715	67.4462	0.554826	4.6832	0.0830588	0.31412	0.00522	0.936985	3.1835	0.0529029	0.10813	0.00134	1761	25.62	1764.24	31.2897	1768	22.44	99.6041	1768	22.44
188_005	522.552	165.66	0.167367	4.74349	0.0812804	0.31702	0.00518	0.953575	3.15438	0.0515414	0.10852	0.00112	1775.2	25.38	1774.96	30.4142	1774.7	18.86	100.028	1774.7	18.86
188_092	75.7854	24.4006	0.493256	4.86905	0.0971692	0.32197	0.00576	0.896443	3.10588	0.0555638	0.10968	0.00194	1799.4	28.12	1796.92	35.8602	1794.1	31.98	100.295	1794.1	31.98
188_004	248.283	79.962	0.412681	4.87529	0.0880211	0.32206	0.00544	0.93557	3.10501	0.0524476	0.10979	0.0014	1799.8	26.56	1798	32.462	1795.9	23.3	100.217	1795.9	23.3
188_080	136.283	43.5125	0.471833	4.83409	0.0887874	0.31928	0.00542	0.924254	3.13205	0.0531687	0.10981	0.00154	1786.2	26.46	1790.85	32.8924	1796.2	25.62	99.4433	1796.2	25.62
188_139	71.5577	23.3056	1.05384	4.9509	0.0989447	0.32569	0.0058	0.891078	3.0704	0.0546788	0.11025	0.002	1817.4	28.2	1810.98	36.1927	1803.5	32.82	100.771	1803.5	32.82
188_125	80.678	26.5003	0.8418	4.99407	0.0978464	0.32847	0.00578	0.898135	3.04442	0.0535718	0.11027	0.0019	1831	28.04	1818.32	35.6254	1803.9	31.02	101.502	1803.9	31.02
188_022	72.2376	23.4946	0.409132	4.9472	0.0967403	0.32524	0.00578	0.908816	3.07465	0.0546412	0.11032	0.0018	1815.3	28.16	1810.35	35.4005	1804.6	29.5	100.593	1804.6	29.5
188_128	340.524	110.092	0.927322	4.92304	0.0868533	0.3233	0.0053	0.929218	3.0931	0.0507066	0.11044	0.00144	1805.8	25.86	1806.21	31.8656	1806.6	23.7	99.9557	1806.6	23.7
188_114	84.5907	27.5427	0.545703	4.97647	0.103253	0.3256	0.00598	0.88519	3.07125	0.0564069	0.11085	0.00214	1817	29.12	1815.33	37.6649	1813.5	35.02	100.193	1813.5	35.02
188_025	87.5436	28.8141	0.556715	5.05463	0.0965018	0.32914	0.00576	0.916633	3.03822	0.0531693	0.11138	0.0017	1834.2	27.92	1828.53	34.9098	1822	27.42	100.67	1822	27.42
188_019	1052.71	283.209	0.203261	4.00169	0.0676605	0.26903	0.00436	0.958503	3.71706	0.06024	0.10788	0.00104	1535.9	22.12	1634.54	27.6368	1764	17.52	87.0692	1974	49
188_131	159.343	53.0596	0.714343	5.53707	0.101811	0.33299	0.00562	0.917886	3.00309	0.0506844	0.1206	0.00176	1852.9	27.16	1906.37	35.0529	1965.2	25.96	94.2856	2032	44
188_121	114.628	35.2905	0.143405	4.99456	0.0944352	0.30787	0.0053	0.910484	3.24812	0.0559166	0.11766	0.00184	1730.2	26.1	1818.4	34.3816	1920.9	27.9	90.0724	2051	51
188_024	55.4184	20.6229	0.568763	6.72613	0.133623	0.37213	0.00674	0.911696	2.68723	0.048671	0.13109	0.00214	2039.4	31.68	2076.06	41.2435	2112.6	28.58	96.5351	2112.6	28.58
188_061	344.279	152.997	0.709781	10.6371	0.182046	0.4444	0.00724	0.951938	2.25023	0.0366598	0.1736	0.00182	2370.3	32.34	2491.96	42.6478	2592.6	17.42	91.4256	2592.6	17.42
188_069	165.637	83.7113	0.248738	12.3074	0.221405	0.50539	0.00854	0.939315	1.97867	0.0334353	0.17662	0.00218	2636.9	36.62	2628.14	47.279	2621.3	20.38	100.595	2621.3	20.38
188_079	112.285	56.8544	0.704092	12.4199	0.230374	0.50634	0.00876	0.932711	1.97496	0.034168	0.1779	0.00238	2641	37.44	2636.69	48.9073	2633.4	22.18	100.289	2633.4	22.18
188_081	163.649	83.1991	0.137694	12.7144	0.22991	0.5084	0.00862	0.93765	1.96696	0.03335	0.18138	0.00228	2649.8	36.86	2658.73	48.0767	2665.5	20.82	99.411	2665.5	20.82
188_054	147.301	75.5612	0.466087	12.8386	0.226287	0.51297	0.00856	0.946761	1.94943	0.0325304	0.18152	0.00206	2669.3	36.48	2667.88	47.0227	2666.8	18.74	100.094	2666.8	18.74
188_059	198.425	101.675	0.840975	12.8578	0.224433	0.51241	0.00848	0.948109	1.95156	0.0322969	0.18199	0.00202	2666.9	36.16	2669.29	46.5924	2671.1	18.28	99.8428	2671.1	18.28
188_117	391.235	152.507	0.24602	9.47506	0.181188	0.38981	0.00684	0.917605	2.56535	0.0450143	0.17629	0.00268	2122	31.76	2385.13	45.61	2618.3	25.24	81.045	2678	29
188_068	159.573	81.9774	0.375791	12.9745	0.230752	0.51373	0.00862	0.943447	1.94655	0.0326616	0.18317	0.00216	2672.5	36.68	2677.8	47.6248	2681.8	19.44	99.6532	2681.8	19.44
188_063	149.179	77.4704	0.656208	13.1226	0.232098	0.51931	0.00868	0.94502	1.92563	0.032186	0.18327	0.00212	2696.2	36.86	2688.51	47.5513	2682.6	19.1	100.507	2682.6	19.1
188_031	145.387	75.1257	0.435335	13.108	0.234449	0.51673	0.00874	0.945658	1.93525	0.0327329	0.18398	0.00214	2685.3	37.14	2687.46	48.0679	2689.1	19.08	99.8587	2689.1	19.08
188_103	186.647	86.5521	0.299266	11.659	0.205723	0.46372	0.00768	0.938609	2.15647	0.0357149	0.18235	0.00222	2456	33.82	2577.42	45.4785	2674.3	20.02	91.8371	2696	22
188_110	293.94	151.399	0.830844	13.1213	0.228517	0.51507	0.00844	0.940878	1.94148	0.0318134	0.18476	0.00218	2678.2	35.9	2688.41	46.8208	2696	19.42	99.3398	2696	19.42
188_091	65.4036	34.5985	0.416921	13.9998	0.288563	0.529	0.00996	0.91345	1.89036	0.0355916	0.19194	0.00322	2737.2	41.98	2749.7	56.6766	2758.9	27.34	99.2135	2758.9	27.34
188_017	165.997	88.8582	0.53582	14.1916	0.247672	0.5353	0.0089	0.952684	1.86811	0.0310596	0.19228	0.00204	2763.8	37.4	2762.6	48.2127	2761.7	17.32	100.076	2761.7	17.32
188_033	93.4378	47.7486	0.147727	13.7079	0.386195	0.51102	0.01266	0.879346	1.95687	0.0484795	0.19455	0.00522	2661	54.02	2729.74	76.9054	2781	43.68	95.685	2781	43.68
188_094	73.9657	39.7062	0.337036	14.4999	0.275456	0.53682	0.00946	0.92763	1.86282	0.0328272	0.1959	0.00278	2770.1	39.66	2782.99	52.8689	2792.4	23.12	99.2014	2792.4	23.12
7228/9-1S 1128.8, Nordmela formation, Finnmark Platform
Zircon_Sample_075	713.594	32.7897	0.818512	0.481695	0.0101791	0.04595	0.00076	0.782691	21.7628	0.35995	0.07603	0.002	289.6	4.66	399.235	8.43658	1096	51.96	26.4234
Zircon_Sample_012	86.8667	6.22139	1.47913	0.865146	0.0223195	0.07162	0.00128	0.692756	13.9626	0.249541	0.08761	0.00326	445.9	7.72	632.928	16.3286	1373.9	70.72	32.4551
Zircon_Sample_099	209.717	10.3579	0.525476	0.422554	0.00913868	0.04939	0.00082	0.767668	20.247	0.336152	0.06205	0.00172	310.8	5.04	357.876	7.73987	675.9	59	45.9831
Zircon_Sample_146	96.4259	3.73265	0.333259	0.309619	0.00858766	0.03871	0.0007	0.65197	25.8331	0.467145	0.05801	0.00244	244.8	4.36	273.885	7.59655	529.8	91.52	46.2061
Zircon_Sample_131	244.675	12.7231	0.215586	0.438646	0.0102959	0.052	0.0009	0.737378	19.2308	0.33284	0.06118	0.00194	326.8	5.48	369.297	8.66813	645.6	67.48	50.6196
Zircon_Sample_103	173.697	6.89577	0.521831	0.310257	0.00728377	0.0397	0.00068	0.729599	25.1889	0.431447	0.05668	0.00182	250.9	4.18	274.38	6.4415	478.4	71.14	52.4457
Zircon_Sample_064	191.929	7.6234	0.618606	0.308223	0.00699513	0.03972	0.00066	0.732156	25.1762	0.418336	0.05628	0.00174	251.1	4.1	272.802	6.19126	462.7	68.26	54.2684
Zircon_Sample_114	145.745	10.2371	0.81166	0.634832	0.0168853	0.07024	0.00128	0.685133	14.2369	0.259442	0.06555	0.00254	437.6	7.66	499.101	13.2751	791.9	80.36	55.2595
Zircon_Sample_094	57.5688	2.76215	1.2893	0.386146	0.0114501	0.04798	0.00088	0.618533	20.842	0.382263	0.05837	0.00272	302.1	5.38	331.55	9.83125	543.7	100.16	55.5637
Zircon_Sample_026	305.303	13.6073	0.326196	0.347333	0.0075828	0.04457	0.00072	0.739956	22.4366	0.362449	0.05652	0.00166	281.1	4.48	302.713	6.60869	472.1	65	59.5425
Zircon_Sample_038	791.693	186.08	0.438432	4.56133	0.0853115	0.23504	0.00368	0.837124	4.25459	0.0666138	0.14075	0.00288	1360.8	19.22	1742.23	32.5853	2236.4	35.2	60.8478
Zircon_Sample_025	42.8499	2.45444	0.466412	0.466995	0.0139964	0.05728	0.00104	0.605795	17.4581	0.316977	0.05913	0.00282	359.1	6.3	389.111	11.6621	572	101.78	62.7797
Zircon_Sample_009	814.894	28.3746	0.281007	0.256132	0.00738554	0.03482	0.00062	0.617511	28.7191	0.511369	0.05335	0.00242	220.6	3.9	231.545	6.67658	343.9	100.78	64.1466
Zircon_Sample_034	449.848	31.098	0.852805	0.590104	0.0137441	0.06913	0.00116	0.720449	14.4655	0.242731	0.06191	0.002	430.9	7.02	470.934	10.9685	670.9	68.42	64.2272
Zircon_Sample_041	236.495	10.2	0.200325	0.326715	0.00743624	0.04313	0.00072	0.733448	23.1857	0.387056	0.05494	0.0017	272.2	4.4	287.055	6.53355	409.7	68.18	66.4389
Zircon_Sample_028	50.5529	3.70047	0.639816	0.616873	0.0158805	0.0732	0.00126	0.668637	13.6612	0.235152	0.06112	0.00234	455.4	7.6	487.885	12.5599	643.4	81.52	70.7802
Zircon_Sample_091	98.3293	5.67557	0.344787	0.453074	0.0144125	0.05772	0.0011	0.599097	17.325	0.330172	0.05693	0.0029	361.8	6.76	379.429	12.0698	488	111.74	74.1393
Zircon_Sample_013	34.5067	2.96205	0.368146	0.748366	0.0217123	0.08584	0.00156	0.626389	11.6496	0.211712	0.06323	0.00286	530.9	9.24	567.276	16.4583	716	94.4	74.148
Zircon_Sample_090	32.8794	5.27123	0.307485	1.8378	0.050287	0.16032	0.00302	0.688434	6.23752	0.117498	0.08314	0.0033	958.6	16.74	1059.08	28.979	1272.5	76.08	75.332
Zircon_Sample_151	609.899	106.629	0.261811	2.10008	0.0410221	0.17483	0.00286	0.837466	5.71984	0.0935695	0.08712	0.00186	1038.7	15.72	1148.83	22.4409	1363.2	40.78	76.1957
Zircon_Sample_080	201.706	20.8665	0.21494	0.949961	0.0217457	0.10345	0.00176	0.743217	9.66651	0.164457	0.0666	0.00204	634.6	10.26	678.083	15.5221	825.2	63.22	76.9026
Zircon_Sample_145	581.343	29.5904	0.470216	0.386346	0.00783971	0.0509	0.00084	0.813276	19.6464	0.324223	0.05505	0.0013	320.1	5.16	331.697	6.73077	414.3	51.98	77.2629
Zircon_Sample_060	333.796	12.731	0.57577	0.276452	0.00584264	0.03814	0.00062	0.769169	26.2192	0.426217	0.05257	0.00142	241.3	3.84	247.839	5.23792	310.4	60.62	77.7384
Zircon_Sample_036	658.431	41.3297	0.487693	0.494704	0.00999364	0.06277	0.001	0.788623	15.9312	0.253802	0.05716	0.00142	392.5	6.08	408.111	8.24436	497.2	54.66	78.9421
Zircon_Sample_022	330.203	97.5815	0.415264	5.31209	0.0996119	0.29552	0.00462	0.8337	3.38387	0.0529015	0.13037	0.0027	1669.1	22.96	1870.81	35.0813	2103	36.06	79.3676
Zircon_Sample_156	468.753	25.3408	0.499952	0.412567	0.00992411	0.05406	0.00094	0.722862	18.498	0.321644	0.05535	0.00184	339.4	5.76	350.722	8.43646	426	71.92	79.6714
Zircon_Sample_014	227.729	12.4272	0.401894	0.41646	0.00882054	0.05457	0.00088	0.761388	18.3251	0.295512	0.05535	0.00152	342.5	5.36	353.516	7.48742	426.3	60.18	80.3425
Zircon_Sample_089	585.726	43.5312	0.38195	0.606739	0.0122642	0.07432	0.0012	0.798804	13.4553	0.217255	0.05921	0.00144	462.1	7.26	481.502	9.7327	574.8	52.56	80.3932
Zircon_Sample_037	171.137	12.9431	0.46188	0.614097	0.0128175	0.07563	0.00122	0.772857	13.2223	0.213291	0.05889	0.00156	470	7.32	486.141	10.1468	563	56.94	83.4813
Zircon_Sample_076	322.368	14.8644	0.505082	0.339562	0.00909623	0.04611	0.00082	0.66386	21.6873	0.385677	0.05341	0.00214	290.6	5.02	296.84	7.95178	346.1	89.2	83.9642
Zircon_Sample_140	41.5998	4.1787	0.582511	0.881555	0.0253543	0.10045	0.00188	0.650738	9.9552	0.186319	0.06365	0.00278	617.1	11.06	641.822	18.4594	730.1	91.4	84.5227
Zircon_Sample_112	138.276	62.8699	0.280897	12.6301	0.243977	0.45467	0.00738	0.840272	2.1994	0.0356996	0.20147	0.00422	2416	32.68	2652.47	51.2378	2838.2	33.96	85.1244
Zircon_Sample_047	177.814	6.56135	0.076768	0.263089	0.00640126	0.0369	0.00062	0.69056	27.1003	0.455343	0.05171	0.00182	233.6	3.86	237.153	5.77022	272.7	79.52	85.6619
Zircon_Sample_015	58.5454	3.58298	0.166668	0.47018	0.0127981	0.0612	0.00106	0.636318	16.3399	0.283011	0.05572	0.00234	382.9	6.48	391.313	10.6513	441	91.58	86.8254
Zircon_Sample_111	441.924	18.8569	0.357788	0.308699	0.00638152	0.04267	0.0007	0.793572	23.4357	0.384461	0.05247	0.00132	269.3	4.32	273.172	5.6471	305.8	56.74	88.0641
Zircon_Sample_081	390.007	26.6453	0.445392	0.534771	0.0106756	0.06832	0.0011	0.806529	14.637	0.235666	0.05677	0.00134	426	6.66	434.971	8.68331	481.8	52.58	88.4184
Zircon_Sample_130	23.1042	3.3776	0.447278	1.4537	0.0426068	0.14619	0.0028	0.653486	6.84041	0.131016	0.07212	0.0032	879.6	15.76	911.405	26.7125	989.4	88.92	88.9024
Zircon_Sample_086	438.712	35.4172	0.300657	0.655396	0.012923	0.08073	0.0013	0.816676	12.387	0.199468	0.05888	0.00134	500.5	7.76	511.794	10.0915	562.7	49.26	88.9462
Zircon_Sample_074	498.029	18.2179	0.409817	0.259294	0.00646466	0.03658	0.00062	0.679822	27.3373	0.463345	0.05141	0.00188	231.6	3.92	234.098	5.83647	259.4	82.7	89.283
Zircon_Sample_125	722.824	28.5949	0.32842	0.282381	0.00613335	0.03956	0.00066	0.768114	25.2781	0.421727	0.05177	0.00144	250.1	4.1	252.545	5.4853	275.2	62.96	90.8794	250.1	4.1
Zircon_Sample_039	465.305	19.701	0.623681	0.301641	0.00790942	0.04234	0.00074	0.666541	23.6183	0.412791	0.05167	0.00202	267.3	4.54	267.681	7.01894	271	88.34	98.6347	267.3	4.54
Zircon_Sample_100	576.409	24.7971	0.335088	0.30613	0.0062271	0.04302	0.0007	0.799922	23.245	0.378231	0.05161	0.00126	271.5	4.32	271.177	5.5161	268.2	55.14	101.23	271.5	4.32
Zircon_Sample_142	156.872	7.51101	0.79704	0.348966	0.00944378	0.04788	0.00086	0.663714	20.8855	0.375137	0.05286	0.00214	301.5	5.28	303.943	8.22536	322.9	90.08	93.3726	301.5	5.28
Zircon_Sample_063	311.237	14.9736	0.344263	0.347989	0.007265	0.04811	0.00078	0.776584	20.7857	0.336995	0.05246	0.00138	302.9	4.8	303.207	6.33009	305.4	59.28	99.1814	302.9	4.8
Zircon_Sample_029	355.688	17.386	0.371137	0.347762	0.00715441	0.04888	0.00078	0.77566	20.4583	0.326462	0.0516	0.00134	307.7	4.8	303.036	6.23429	267.5	59.26	115.028	307.7	4.8
Zircon_Sample_048	368.859	18.6938	0.439116	0.374404	0.00769908	0.05068	0.00082	0.786826	19.7316	0.319257	0.05358	0.00136	318.7	4.98	322.912	6.64023	353.3	56.52	90.2066	318.7	4.98
Zircon_Sample_137	274.307	13.9211	0.66949	0.374082	0.00802682	0.05075	0.00084	0.771376	19.7044	0.326142	0.05346	0.00146	319.1	5.2	322.674	6.92375	348.5	61.28	91.5638	319.1	5.2
Zircon_Sample_088	269.83	13.872	0.33715	0.374977	0.00792887	0.05141	0.00084	0.772725	19.4515	0.317822	0.0529	0.00142	323.2	5.16	323.335	6.83691	324.3	60.06	99.6608	323.2	5.16
Zircon_Sample_139	878.331	45.9894	0.338509	0.385877	0.00884244	0.05236	0.0009	0.750101	19.0985	0.328279	0.05345	0.00162	329	5.46	331.353	7.59301	347.9	67.88	94.5674	329	5.46
Zircon_Sample_010	99.4796	5.21472	0.562662	0.382344	0.00934649	0.05242	0.00088	0.686738	19.0767	0.32025	0.0529	0.00188	329.4	5.36	328.761	8.03665	324.3	79.3	101.573	329.4	5.36
Zircon_Sample_107	137.102	7.63382	0.530237	0.410344	0.00951702	0.05568	0.00094	0.727907	17.9598	0.3032	0.05345	0.0017	349.3	5.74	349.123	8.09713	347.8	71.26	100.431	349.3	5.74
Zircon_Sample_141	843.286	49.2141	0.630704	0.441119	0.00940402	0.05836	0.00098	0.787685	17.135	0.287737	0.05482	0.00144	365.6	5.92	371.041	7.91006	404.7	57.42	90.3385	365.6	5.92
Zircon_Sample_053	267.423	17.8291	0.521673	0.508803	0.0107455	0.06667	0.00108	0.767037	14.9993	0.242976	0.05535	0.0015	416.1	6.54	417.644	8.82029	426.1	59.56	97.6531	416.1	6.54
Zircon_Sample_051	251.416	17.5036	0.601141	0.53362	0.0115697	0.06962	0.00114	0.755235	14.3637	0.2352	0.05559	0.00158	433.8	6.86	434.209	9.41429	435.6	61.54	99.5868	433.8	6.86
Zircon_Sample_101	198.03	13.9235	0.452355	0.541914	0.0122077	0.07031	0.00118	0.745007	14.2227	0.238697	0.0559	0.00168	438	7.12	439.686	9.90483	448	65.76	97.7679	438	7.12
Zircon_Sample_154	112.461	7.93859	0.765157	0.542612	0.0136926	0.07059	0.00124	0.696118	14.1663	0.248849	0.05575	0.00202	439.7	7.52	440.145	11.1069	442.1	78.58	99.4571	439.7	7.52
Zircon_Sample_016	768.474	55.2148	0.489945	0.542985	0.0103427	0.07185	0.00112	0.818361	13.9179	0.216952	0.05481	0.0012	447.3	6.74	440.391	8.38851	404.6	47.86	110.554	447.3	6.74
Zircon_Sample_033	108.582	7.88956	0.0193089	0.562431	0.0128064	0.07266	0.0012	0.725315	13.7627	0.227295	0.05614	0.00176	452.2	7.22	453.107	10.3172	457.7	68	98.7983	452.2	7.22
Zircon_Sample_061	274.578	20.143	0.478751	0.564815	0.011395	0.07336	0.00118	0.797283	13.6314	0.219262	0.05584	0.00136	456.4	7.08	454.655	9.1726	445.7	53.14	102.401	456.4	7.08
Zircon_Sample_067	589.508	43.8771	0.305553	0.575824	0.0111866	0.07443	0.00118	0.816069	13.4354	0.213003	0.05611	0.00126	462.8	7.12	461.774	8.97091	456.2	48.5	101.447	462.8	7.12
Zircon_Sample_078	378.498	28.5161	0.861458	0.579748	0.0116865	0.07534	0.00122	0.80332	13.2732	0.214936	0.05581	0.00134	468.3	7.28	464.299	9.35931	444.6	51.78	105.331	468.3	7.28
Zircon_Sample_055	677.775	51.2466	0.354595	0.593084	0.0114777	0.07561	0.0012	0.820096	13.2258	0.209905	0.05689	0.00126	469.9	7.18	472.835	9.15055	486.8	49.08	96.5283	469.9	7.18
Zircon_Sample_021	218.033	16.4877	0.458926	0.58357	0.0118558	0.07562	0.0012	0.781101	13.224	0.209849	0.05597	0.00142	469.9	7.22	466.753	9.48254	450.7	54.86	104.26	469.9	7.22
Zircon_Sample_155	469.171	35.6148	0.835879	0.59931	0.0124169	0.07591	0.00126	0.801142	13.1735	0.218662	0.05726	0.00142	471.7	7.58	476.796	9.87857	501	54.72	94.1517	471.7	7.58
Zircon_Sample_027	187.496	14.2703	1.0084	0.593333	0.0122784	0.07611	0.00122	0.774594	13.1389	0.210609	0.05654	0.00148	472.8	7.32	472.994	9.78813	473	58.14	99.9577	472.8	7.32
Zircon_Sample_138	127.083	9.66972	0.498402	0.590135	0.0131363	0.07609	0.00128	0.755721	13.1423	0.221083	0.05625	0.00164	472.8	7.72	470.954	10.4833	461.7	64.46	102.404	472.8	7.72
Zircon_Sample_087	192.815	14.7099	0.247719	0.596525	0.0133508	0.07629	0.00128	0.74966	13.1079	0.219925	0.05671	0.00168	474	7.62	475.026	10.6315	479.6	65.2	98.8324	474	7.62
Zircon_Sample_129	238.498	18.796	0.267766	0.618946	0.0135292	0.07881	0.00132	0.766253	12.6887	0.212526	0.05696	0.0016	489	7.9	489.186	10.6929	489.5	62.02	99.8979	489	7.9
Zircon_Sample_065	395.639	31.481	0.605247	0.62656	0.0124105	0.07957	0.00128	0.812147	12.5676	0.202167	0.05711	0.00132	493.5	7.6	493.951	9.78385	495.2	51.34	99.6567	493.5	7.6
Zircon_Sample_046	700.601	61.2606	0.223231	0.708183	0.0135814	0.08744	0.00138	0.822941	11.4364	0.180492	0.05874	0.00128	540.4	8.2	543.667	10.4264	557.5	47.5	96.9327	540.4	8.2
Zircon_Sample_104	432.805	37.996	0.25831	0.717191	0.0153634	0.08779	0.00146	0.776348	11.3908	0.189436	0.05925	0.0016	542.5	8.64	549.007	11.7606	576.1	58.1	94.1677	542.5	8.64
Zircon_Sample_062	272.963	39.3886	0.818686	1.35472	0.0268599	0.1443	0.00232	0.810902	6.93001	0.111418	0.06809	0.00158	868.9	13.04	869.598	17.2414	871.4	47.62	99.7131	868.9	13.04
Zircon_Sample_072	305.455	49.0072	1.01544	1.56111	0.0312591	0.16044	0.0026	0.809315	6.23286	0.101006	0.07057	0.00166	959.2	14.4	954.908	19.1207	945.1	47.92	101.492	959.2	14.4
Zircon_Sample_054	96.8968	16.3756	0.26514	1.72456	0.037772	0.169	0.00282	0.761853	5.91716	0.098736	0.07401	0.0021	1006.6	15.56	1017.73	22.2906	1041.7	56.74	96.6305	1006.6	15.56
Zircon_Sample_042	318.809	57.8639	0.323316	1.88365	0.0359429	0.1815	0.00286	0.825801	5.50964	0.0868186	0.07527	0.00162	1075.2	15.62	1075.35	20.5193	1075.7	42.86	99.9535	1075.2	15.62
Zircon_Sample_126	257.046	49.3656	0.156667	2.11283	0.0508181	0.19205	0.00342	0.740385	5.20698	0.0927251	0.07979	0.00258	1132.5	18.52	1153	27.7321	1191.8	63.36	95.0243	1132.5	18.52
Zircon_Sample_133	184.832	37.116	0.440567	2.19314	0.0435041	0.20081	0.0033	0.828448	4.97983	0.0818358	0.07921	0.00176	1179.7	17.68	1178.86	23.3845	1177.3	43.82	100.204	1179.7	17.68
Zircon_Sample_128	536.245	112.772	0.193996	2.35942	0.0460799	0.2103	0.00342	0.832684	4.75511	0.0773299	0.08137	0.00176	1230.4	18.26	1230.41	24.0301	1230.4	42.14	100	1230.4	18.26
Zircon_Sample_011	451.113	117.754	0.379335	3.36046	0.0628547	0.26103	0.00406	0.831566	3.83098	0.0595861	0.09337	0.00194	1495.1	20.74	1495.23	27.9671	1495.3	38.94	99.9866	1495.3	38.94
Zircon_Sample_059	664.504	174.552	0.240518	3.40742	0.0652057	0.26268	0.00418	0.831552	3.80691	0.060579	0.09408	0.002	1503.5	21.32	1506.11	28.8214	1509.7	40.06	99.5893	1509.7	40.06
Zircon_Sample_077	116.063	30.686	0.917881	3.44528	0.0699665	0.26439	0.00434	0.808311	3.78229	0.0620869	0.09451	0.00226	1512.3	22.14	1514.79	30.7623	1518.4	44.92	99.5983	1518.4	44.92
Zircon_Sample_073	363.745	98.1712	0.116835	3.5549	0.0677691	0.26989	0.0043	0.835753	3.70521	0.059033	0.09553	0.002	1540.2	21.82	1539.53	29.3489	1538.6	39.24	100.104	1538.6	39.24
Zircon_Sample_079	773.535	211.531	0.389392	3.66225	0.0692811	0.27346	0.00434	0.838938	3.65684	0.0580366	0.09713	0.002	1558.3	22.02	1563.18	29.5716	1569.6	38.4	99.2801	1569.6	38.4
Zircon_Sample_052	44.7049	12.9836	0.401567	4.10256	0.0828848	0.29043	0.00474	0.807824	3.44317	0.0561947	0.10245	0.00244	1643.7	23.68	1654.81	33.4325	1669	43.82	98.4841	1669	43.82
Zircon_Sample_040	63.5567	20.0553	0.676475	4.71236	0.103236	0.31555	0.00538	0.778254	3.16907	0.0540314	0.10831	0.00298	1768	26.38	1769.44	38.764	1771.2	49.82	99.8193	1771.2	49.82
Zircon_Sample_024	211.656	67.3172	0.335856	4.76898	0.0913431	0.31805	0.00502	0.824059	3.14416	0.0496264	0.10875	0.00236	1780.2	24.58	1779.45	34.0829	1778.5	39.3	100.096	1778.5	39.3
Zircon_Sample_132	84.714	27.7269	0.231224	5.04171	0.102545	0.3273	0.00546	0.820181	3.0553	0.0509684	0.11172	0.0026	1825.3	26.52	1826.36	37.1469	1827.6	41.86	99.8742	1827.6	41.86
Zircon_Sample_143	227.091	74.7789	0.311852	5.10687	0.0999099	0.32929	0.0054	0.838227	3.03684	0.0498008	0.11248	0.0024	1835	26.18	1837.25	35.9436	1839.8	38.48	99.7391	1839.8	38.48
Zircon_Sample_085	429.414	144.592	0.0911328	5.32331	0.102715	0.33672	0.00542	0.834216	2.96983	0.0478037	0.11466	0.00244	1870.9	26.1	1872.61	36.1327	1874.5	38.22	99.8079	1874.5	38.22
Zircon_Sample_127	600.291	202.184	0.500638	5.31545	0.102367	0.33681	0.00546	0.84176	2.96903	0.0481308	0.11446	0.00238	1871.3	26.32	1871.35	36.0391	1871.3	37.34	100	1871.3	37.34
Zircon_Sample_158	670.524	226.677	0.0882683	5.34403	0.104166	0.33806	0.00554	0.840736	2.95805	0.0484755	0.11465	0.00242	1877.3	26.74	1875.94	36.5657	1874.4	37.68	100.155	1874.4	37.68
Zircon_Sample_113	230.392	79.0475	0.495628	6.09357	0.117857	0.3431	0.00556	0.837857	2.9146	0.0472317	0.12881	0.00272	1901.6	26.66	1989.33	38.476	2081.8	36.88	91.344	2081.8	36.88
Zircon_Sample_115	140.016	48.0996	1.29428	5.54276	0.109079	0.34353	0.00562	0.831301	2.91095	0.0476219	0.11702	0.00256	1903.6	26.94	1907.25	37.5338	1911.2	38.92	99.6023	1911.2	38.92
Zircon_Sample_020	42.2092	14.9146	0.172223	5.85321	0.134926	0.35335	0.00624	0.766089	2.83006	0.0499775	0.12014	0.00356	1950.6	29.76	1954.32	45.0503	1958.3	52.24	99.6068	1958.3	52.24
Zircon_Sample_144	173.115	62.5897	0.324853	5.88485	0.116935	0.36155	0.00598	0.832383	2.76587	0.0457472	0.11805	0.0026	1989.5	28.28	1959	38.9265	1926.8	39.06	103.254	1926.8	39.06
Zircon_Sample_066	223.68	81.0483	0.0315682	6.12703	0.119305	0.36234	0.00584	0.827728	2.75984	0.0444816	0.12264	0.00268	1993.3	27.6	1994.1	38.8291	1994.9	38.5	99.9198	1994.9	38.5
Zircon_Sample_049	61.7049	25.1324	0.255308	7.75942	0.151975	0.4073	0.00658	0.824836	2.45519	0.0396641	0.13817	0.00306	2202.6	30.14	2203.51	43.1578	2204.3	38.28	99.9229	2204.3	38.28
Zircon_Sample_098	69.2886	32.4444	0.479119	10.5843	0.206348	0.46825	0.00762	0.834722	2.13561	0.0347536	0.16394	0.00352	2475.9	33.44	2487.34	48.492	2496.7	35.88	99.1669	2496.7	35.88
Zircon_Sample_159	263.73	127.674	0.346835	11.2452	0.220926	0.48411	0.008	0.841139	2.06565	0.0341352	0.16847	0.00358	2545.1	34.7	2543.67	49.9735	2542.5	35.36	100.102	2542.5	35.36
Zircon_Sample_150	252.365	123.843	0.423307	11.5194	0.224251	0.49073	0.00804	0.84161	2.03778	0.0333865	0.17025	0.00358	2573.9	34.8	2566.16	49.9558	2560.1	34.92	100.539	2560.1	34.92
Zircon_Sample_153	81.8745	40.36	0.299634	11.8155	0.235576	0.49295	0.00822	0.836357	2.0286	0.0338272	0.17384	0.0038	2583.4	35.48	2589.9	51.6368	2594.9	36.18	99.5568	2594.9	36.18
Zircon_Sample_007	136.87	67.496	0.56126	13.3316	0.248941	0.49314	0.00768	0.834022	2.02782	0.0315806	0.19607	0.00404	2584.3	33.18	2703.42	50.4809	2793.8	33.58	92.5013	2793.8	33.58
Zircon_Sample_102	272.705	137.353	0.234454	13.0267	0.249076	0.50367	0.0081	0.841087	1.98543	0.0319296	0.18758	0.00388	2629.6	34.7	2681.59	51.2732	2721.1	33.88	96.6374	2721.1	33.88
Zircon_Sample_124	60.4652	31.7406	1.13168	13.5044	0.283094	0.52494	0.00906	0.823312	1.90498	0.0328783	0.18658	0.00444	2720.1	38.3	2715.59	56.9271	2712.3	38.96	100.288	2712.3	38.96
Zircon_Sample_023	53.2064	28.0722	0.528414	13.6939	0.300035	0.52761	0.00932	0.806227	1.89534	0.0334803	0.18824	0.00488	2731.4	39.3	2728.77	59.7878	2726.8	42.4	100.169	2726.8	42.4
Zircon_Sample_105	32.9067	17.4234	0.717377	13.8891	0.299089	0.52948	0.00932	0.817413	1.88865	0.0332443	0.19025	0.00472	2739.3	39.26	2742.18	59.0501	2744.4	40.52	99.8142	2744.4	40.52
Zircon_Sample_093	311.93	166.686	0.0697697	14.1788	0.270342	0.53437	0.00856	0.84015	1.87136	0.0299771	0.19244	0.00398	2759.8	35.96	2761.74	52.6572	2763.1	33.66	99.8806	2763.1	33.66
Zircon_Sample_050	150.088	81.4135	0.0805828	14.6412	0.278231	0.54244	0.00862	0.836232	1.84352	0.0292957	0.19576	0.00408	2793.7	36	2792.21	53.0612	2791.2	33.92	100.09	2791.2	33.92
7121/5-1 2512.5, Tubåen Formation, Hammerfest Basin
Zircon_Sample_114	1225.93	151.966	0.413624	1.67566	0.0624995	0.12396	0.00444	0.960309	8.06712	0.288948	0.09804	0.00204	753.3	25.44	999.336	37.2737	1587.1	38.7	47.4639
Zircon_Sample_010	814.81	126.719	0.59321	2.17476	0.0758546	0.15552	0.00518	0.954933	6.43004	0.214169	0.10142	0.0021	931.8	28.86	1173	40.9138	1650.3	37.96	56.4625
Zircon_Sample_092	40.2671	4.29127	0.588059	1.13393	0.0458777	0.10657	0.00384	0.890592	9.3835	0.338113	0.07717	0.00284	652.8	22.4	769.623	31.1383	1125.6	72.68	57.9957
Zircon_Sample_049	1528.17	130.598	0.299766	0.789005	0.0281923	0.08546	0.00292	0.956244	11.7014	0.399813	0.06696	0.0014	528.6	17.34	590.607	21.1033	836.7	43.22	63.1768
Zircon_Sample_020	15.038	4.01861	0.265272	4.46938	0.169046	0.26723	0.0092	0.910218	3.74209	0.12883	0.1213	0.0038	1526.7	46.82	1725.3	65.2563	1975.5	55.4	77.2817
Zircon_Sample_014	99.81	14.0572	1.76317	1.47759	0.0529118	0.14084	0.00472	0.935877	7.10026	0.237952	0.07609	0.00192	849.4	26.72	921.244	32.9892	1097.4	50.18	77.4011
Zircon_Sample_081	315.013	82.7887	0.32313	4.1563	0.152277	0.26281	0.0092	0.955474	3.80503	0.1332	0.1147	0.00248	1504.2	46.96	1665.45	61.0181	1875.2	38.68	80.2154
Zircon_Sample_127	321.05	76.8081	0.379664	3.42267	0.129191	0.23924	0.00866	0.958997	4.1799	0.151304	0.10376	0.00222	1382.7	45	1509.61	56.9814	1692.4	39.26	81.7005
Zircon_Sample_150	201.09	30.3948	0.41967	1.57763	0.0608615	0.15115	0.00556	0.953518	6.61594	0.243365	0.0757	0.00176	907.4	31.18	961.436	37.0901	1087.1	46.2	83.4698
Zircon_Sample_152	294.734	25.7185	0.139358	0.734518	0.0285294	0.08726	0.00322	0.950058	11.46	0.422888	0.06105	0.00148	539.3	19.1	559.201	21.7199	640.8	51.94	84.1604
Zircon_Sample_035	218.167	98.6204	0.275704	12.6462	0.447232	0.45204	0.0153	0.957065	2.21219	0.0748751	0.2029	0.00416	2404.3	67.92	2653.66	93.8467	2849.6	33.2	84.3732
Zircon_Sample_060	730.483	159.216	0.211625	2.80659	0.101478	0.21796	0.00752	0.954219	4.588	0.158294	0.09339	0.00202	1271.1	39.78	1357.3	49.0758	1495.8	40.68	84.9779
Zircon_Sample_034	108.021	26.9935	0.416162	3.51612	0.126887	0.24989	0.0085	0.942575	4.00176	0.13612	0.10205	0.00246	1437.9	43.88	1530.84	55.244	1661.8	44.42	86.5267
Zircon_Sample_007	199.107	50.5075	0.498091	3.58994	0.12538	0.25367	0.00844	0.95265	3.94213	0.131161	0.10264	0.00218	1457.4	43.36	1547.31	54.0402	1672.4	39.02	87.1442
Zircon_Sample_137	293.189	74.0098	0.579506	3.48781	0.132459	0.25243	0.0092	0.959663	3.96149	0.14438	0.10021	0.00214	1451	47.32	1524.46	57.8955	1627.9	39.6	89.1332
Zircon_Sample_072	372.222	19.229	0.158978	0.380576	0.0141921	0.05166	0.0018	0.934356	19.3573	0.674472	0.05343	0.00142	324.7	11.06	327.461	12.2114	347.1	59.32	93.5465	324.7	11.06
Zircon_Sample_059	191.639	13.3285	0.00207097	0.534138	0.0209635	0.06955	0.00244	0.893887	14.3781	0.504424	0.0557	0.00196	433.5	14.66	434.552	17.055	440.1	76.54	98.5003	433.5	14.66
Zircon_Sample_015	161.926	12.3679	0.513379	0.599335	0.0227692	0.07638	0.0026	0.896016	13.0924	0.445671	0.05691	0.00192	474.5	15.52	476.812	18.1144	487.4	74.68	97.3533	474.5	15.52
Zircon_Sample_022	476.111	63.7608	0.0164059	1.2161	0.0429718	0.13392	0.0045	0.950938	7.46714	0.250912	0.06586	0.00144	810.2	25.56	807.989	28.5509	802	45.48	101.022	810.2	25.56
Zircon_Sample_078	596.769	83.6551	0.0360526	1.29401	0.0471481	0.14018	0.00488	0.955448	7.13369	0.248341	0.06695	0.00144	845.7	27.64	843.074	30.718	836.2	44.2	101.136	845.7	27.64
Zircon_Sample_106	339.685	54.6214	2.27301	1.5737	0.0589094	0.1608	0.00574	0.953597	6.21891	0.221993	0.07098	0.0016	961.2	31.84	959.889	35.9321	956.9	45.98	100.449	961.2	31.84
Zircon_Sample_076	83.9755	14.0004	0.327889	1.66107	0.0620679	0.16672	0.00584	0.937444	5.99808	0.210106	0.07226	0.00188	994	32.3	993.783	37.134	993.2	52.54	100.081	994	32.3
Zircon_Sample_090	230.506	39.6586	0.397287	1.73789	0.0682293	0.17205	0.00616	0.911965	5.81226	0.2081	0.07326	0.00236	1023.4	33.86	1022.68	40.1503	1021	64.3	100.235	1023.4	33.86
Zircon_Sample_086	273.367	48.2247	0.308913	1.80747	0.0666552	0.17641	0.0062	0.953029	5.66861	0.199226	0.07431	0.00166	1047.3	33.96	1048.16	38.6538	1049.8	44.5	99.7619	1047.3	33.96
Zircon_Sample_129	183.412	32.4768	0.171882	1.8948	0.072054	0.17707	0.00642	0.953446	5.64748	0.20476	0.07761	0.00178	1050.9	35.16	1079.27	41.0415	1137	45.12	92.4274	1050.9	35.16
Zircon_Sample_131	87.767	15.6532	0.211266	1.87358	0.0782273	0.17835	0.00664	0.89168	5.60695	0.208748	0.07619	0.00288	1057.9	36.34	1071.8	44.7505	1100.2	74.62	96.1552	1057.9	36.34
Zircon_Sample_063	165.296	29.7087	0.346762	1.83604	0.0671786	0.17973	0.00622	0.945845	5.5639	0.192553	0.07409	0.00176	1065.5	34.02	1058.44	38.7273	1043.8	47.52	102.079	1065.5	34.02
Zircon_Sample_027	788.846	144.761	0.16727	1.90527	0.0675916	0.18351	0.00618	0.949275	5.44929	0.183514	0.0753	0.00168	1086.1	33.72	1082.93	38.4183	1076.6	44.64	100.882	1086.1	33.72
Zircon_Sample_038	99.6431	18.6741	1.32578	1.95713	0.071201	0.18741	0.0064	0.938687	5.33589	0.182219	0.07574	0.0019	1107.3	34.72	1100.9	40.051	1088.1	49.96	101.765	1107.3	34.72
Zircon_Sample_117	437.116	83.4061	0.241997	2.05446	0.0768157	0.19081	0.00684	0.958744	5.24082	0.187868	0.07809	0.00166	1125.8	37.06	1133.78	42.3917	1149.1	42.12	97.9723	1125.8	37.06
Zircon_Sample_048	419.363	80.5219	0.270305	2.083	0.0746386	0.19201	0.00656	0.953468	5.20806	0.177933	0.07868	0.0017	1132.2	35.48	1143.22	40.9643	1164	42.5	97.268	1132.2	35.48
Zircon_Sample_079	145.845	28.0344	0.358604	2.06938	0.0761762	0.19222	0.00672	0.949711	5.20237	0.181875	0.07808	0.0018	1133.4	36.38	1138.73	41.9178	1149	45.54	98.6423	1133.4	36.38
Zircon_Sample_116	400.333	77.0361	0.097818	2.04511	0.0771616	0.19243	0.00692	0.953121	5.19669	0.186879	0.07708	0.00176	1134.5	37.36	1130.67	42.6599	1123.2	44.98	101.006	1134.5	37.36
Zircon_Sample_107	45.4288	8.80728	0.403795	2.06763	0.0802365	0.19387	0.00698	0.92778	5.1581	0.18571	0.07735	0.00224	1142.3	37.7	1138.15	44.167	1130.2	57.06	101.071	1142.3	37.7
Zircon_Sample_094	42.8424	8.31143	0.407913	2.0987	0.084674	0.194	0.00702	0.896885	5.15464	0.186524	0.07846	0.0028	1143	37.88	1148.38	46.3324	1158.6	70.06	98.6535	1143	37.88
Zircon_Sample_066	1192.08	243.352	0.153933	2.18701	0.0790789	0.20414	0.00706	0.956459	4.8986	0.169414	0.0777	0.00164	1197.5	37.78	1176.91	42.5554	1139.3	41.48	105.108	1197.5	37.78
Zircon_Sample_091	927.32	199.207	0.173433	2.4282	0.0890853	0.21482	0.00756	0.959235	4.65506	0.163822	0.08198	0.0017	1254.4	40.1	1250.99	45.896	1245	40.28	100.755	1245	40.28
Zircon_Sample_016	78.4893	17.8296	0.250445	2.81386	0.100059	0.22716	0.00762	0.943348	4.40218	0.14767	0.08984	0.00212	1319.6	40.06	1359.23	48.3332	1422.1	44.76	92.7923	1422.1	44.76
Zircon_Sample_068	155.181	35.5069	0.446911	2.69076	0.0983582	0.22881	0.00794	0.949312	4.37044	0.15166	0.08529	0.00196	1328.2	41.7	1325.92	48.4678	1322.1	44.32	100.461	1322.1	44.32
Zircon_Sample_037	481.741	110.55	0.275409	2.71857	0.0966546	0.22948	0.00778	0.95357	4.35768	0.147737	0.08592	0.00184	1331.8	40.82	1333.54	47.412	1336.4	41.26	99.6558	1336.4	41.26
Zircon_Sample_040	305.407	70.9887	0.194665	2.96484	0.105937	0.23244	0.0079	0.951199	4.30219	0.14622	0.09251	0.00204	1347.3	41.38	1398.65	49.9753	1477.8	41.72	91.1693	1477.8	41.72
Zircon_Sample_055	206.45	48.2434	0.220889	2.8086	0.101038	0.23368	0.00802	0.954017	4.27936	0.146869	0.08717	0.00188	1353.8	41.96	1357.83	48.8476	1364.2	41.44	99.2376	1364.2	41.44
Zircon_Sample_024	139.382	32.8789	0.332167	2.8472	0.103318	0.23589	0.008	0.934591	4.23926	0.143771	0.08754	0.00226	1365.3	41.72	1368.07	49.6441	1372.4	49.28	99.4827	1372.4	49.28
Zircon_Sample_089	262.105	62.0639	0.791884	2.90246	0.107415	0.23679	0.00834	0.951713	4.22315	0.148744	0.0889	0.00202	1370	43.5	1382.55	51.1656	1401.9	43.04	97.7245	1401.9	43.04
Zircon_Sample_064	617.212	146.168	0.258691	2.85614	0.103222	0.23682	0.00818	0.955746	4.22262	0.145853	0.08747	0.00186	1370.1	42.66	1370.43	49.5277	1370.9	40.78	99.9416	1370.9	40.78
Zircon_Sample_151	64.6347	15.4432	0.399273	2.90893	0.117105	0.23893	0.00892	0.927367	4.18533	0.156251	0.0883	0.00266	1381.2	46.42	1384.23	55.7252	1389	57.32	99.4384	1389	57.32
Zircon_Sample_026	84.3337	20.1532	0.268799	2.87119	0.10295	0.23897	0.00808	0.942979	4.18463	0.14149	0.08714	0.00208	1381.3	42.04	1374.38	49.2804	1363.5	45.46	101.305	1363.5	45.46
Zircon_Sample_042	414.927	103.906	0.391853	3.14687	0.111978	0.25042	0.00852	0.956134	3.99329	0.135863	0.09114	0.0019	1440.6	43.9	1444.23	51.3913	1449.5	39.4	99.386	1449.5	39.4
Zircon_Sample_013	95.1041	23.8283	0.474742	3.28565	0.119688	0.25055	0.00846	0.926934	3.99122	0.134766	0.09511	0.0026	1441.3	43.64	1477.66	53.8272	1530.2	51	94.1903	1530.2	51
Zircon_Sample_144	587.995	147.657	0.256173	3.30317	0.125618	0.25112	0.00918	0.961263	3.98216	0.145573	0.0954	0.002	1444.2	47.34	1481.8	56.352	1536	39.3	94.0234	1536	39.3
Zircon_Sample_156	102.697	25.9342	0.276549	3.20995	0.125204	0.25253	0.00936	0.950257	3.95993	0.146774	0.09219	0.00224	1451.5	48.22	1459.56	56.9305	1471.2	45.92	98.661	1471.2	45.92
Zircon_Sample_050	239.216	60.8111	0.491663	3.23691	0.118009	0.25421	0.00874	0.943048	3.93376	0.135247	0.09235	0.00224	1460.2	44.96	1466.05	53.4481	1474.6	45.8	99.0235	1474.6	45.8
Zircon_Sample_021	114.843	29.2046	0.410246	3.19949	0.114633	0.2543	0.00858	0.941698	3.93236	0.132677	0.09125	0.0022	1460.6	44.08	1457.04	52.2035	1451.8	45.66	100.606	1451.8	45.66
Zircon_Sample_139	164.807	41.9138	0.234843	3.27618	0.125647	0.25432	0.0093	0.953496	3.93205	0.143788	0.09343	0.00216	1460.7	47.82	1475.41	56.5845	1496.6	43.58	97.6012	1496.6	43.58
Zircon_Sample_158	220.217	56.4681	0.42026	3.26152	0.126	0.25642	0.0095	0.959001	3.89985	0.144484	0.09225	0.00202	1471.5	48.7	1471.92	56.8641	1472.4	41.48	99.9389	1472.4	41.48
Zircon_Sample_047	296.449	76.2616	0.459102	3.33344	0.119067	0.25725	0.00878	0.955523	3.88727	0.132673	0.09398	0.00198	1475.8	45.02	1488.92	53.1825	1507.7	39.5	97.8842	1507.7	39.5
Zircon_Sample_008	151.215	39.0149	0.42986	3.2885	0.115917	0.25801	0.0086	0.945608	3.87582	0.129189	0.09244	0.00212	1479.6	44.1	1478.33	52.1103	1476.3	43.42	100.224	1476.3	43.42
Zircon_Sample_054	232.646	60.1273	0.332086	3.32511	0.119323	0.25845	0.00886	0.955294	3.86922	0.132642	0.09331	0.00198	1481.9	45.44	1486.97	53.3606	1494.2	40.06	99.1768	1494.2	40.06
Zircon_Sample_124	81.2061	21.2882	0.373564	3.38103	0.128814	0.26215	0.0095	0.951172	3.81461	0.138237	0.09354	0.0022	1500.8	48.48	1500.01	57.1489	1498.9	44.3	100.127	1498.9	44.3
Zircon_Sample_111	214.279	56.9811	0.258076	3.46595	0.129346	0.26592	0.0095	0.957288	3.76053	0.134345	0.09453	0.00204	1520.1	48.4	1519.5	56.7063	1518.7	40.36	100.092	1518.7	40.36
Zircon_Sample_062	136.757	36.7397	0.366249	3.72156	0.134857	0.26865	0.00928	0.953264	3.72232	0.12858	0.10047	0.0022	1534	47.16	1576.01	57.1095	1632.7	40.38	93.9548	1632.7	40.38
Zircon_Sample_011	158.29	43.3587	0.294212	3.65029	0.128211	0.27392	0.00914	0.949999	3.6507	0.121814	0.09665	0.00212	1560.7	46.24	1560.57	54.8129	1560.4	40.82	100.019	1560.4	40.82
Zircon_Sample_041	336.731	92.7963	0.541314	3.91293	0.139704	0.27558	0.00938	0.95334	3.62871	0.123512	0.10298	0.00222	1569.1	47.4	1616.36	57.7092	1678.5	39.6	93.4823	1678.5	39.6
Zircon_Sample_103	676.196	186.927	0.232167	3.69606	0.136716	0.27644	0.00982	0.960351	3.61742	0.128502	0.09697	0.002	1573.4	49.56	1570.52	58.093	1566.6	38.6	100.434	1566.6	38.6
Zircon_Sample_033	167.349	46.4359	0.27809	4.07152	0.14438	0.27748	0.00938	0.953281	3.60386	0.121826	0.10642	0.00228	1578.7	47.38	1648.62	58.4615	1739.1	38.9	90.7768	1739.1	38.9
Zircon_Sample_023	369.271	103.244	0.328637	3.76632	0.133056	0.27959	0.0094	0.951674	3.57667	0.12025	0.0977	0.00212	1589.3	47.36	1585.6	56.0158	1580.6	40.2	100.55	1580.6	40.2
Zircon_Sample_077	100.205	28.1044	0.580804	3.80447	0.142215	0.28047	0.00986	0.940461	3.56544	0.125344	0.09838	0.0025	1593.7	49.64	1593.69	59.5736	1593.7	47.1	100	1593.7	47.1
Zircon_Sample_061	77.2547	21.7163	0.659204	3.79907	0.138474	0.2811	0.00972	0.948666	3.55745	0.123011	0.09802	0.00226	1596.9	48.94	1592.55	58.0477	1586.7	42.72	100.643	1586.7	42.72
Zircon_Sample_153	69.9249	19.7167	0.724201	3.85203	0.154209	0.28197	0.01054	0.933722	3.54648	0.132567	0.09908	0.00284	1601.3	52.98	1603.69	64.201	1606.9	53.14	99.6515	1606.9	53.14
Zircon_Sample_105	111.942	31.6897	0.492548	3.84977	0.144022	0.28309	0.0101	0.953678	3.53245	0.12603	0.09863	0.00222	1606.9	50.7	1603.22	59.9775	1598.4	41.54	100.532	1598.4	41.54
Zircon_Sample_025	174.287	49.602	0.634334	3.92093	0.138621	0.2846	0.00958	0.95212	3.5137	0.118276	0.09992	0.00216	1614.5	48.08	1618.01	57.2032	1622.5	40.06	99.5069	1622.5	40.06
Zircon_Sample_142	52.2712	14.971	0.317459	3.9818	0.156586	0.28641	0.01058	0.939341	3.4915	0.128976	0.10083	0.00272	1623.6	53	1630.49	64.1199	1639.5	49.56	99.0302	1639.5	49.56
Zircon_Sample_051	169.456	48.5372	0.299169	3.91928	0.147222	0.28643	0.00996	0.925708	3.49125	0.121401	0.09924	0.00282	1623.6	49.92	1617.67	60.7655	1609.9	52.34	100.851	1609.9	52.34
Zircon_Sample_126	199.046	57.164	0.521788	3.91463	0.148301	0.28719	0.0104	0.955895	3.48202	0.126094	0.09886	0.0022	1627.5	52.04	1616.71	61.2472	1602.7	41.3	101.547	1602.7	41.3
Zircon_Sample_118	72.4915	20.8942	0.529748	3.97213	0.150924	0.28823	0.0104	0.949638	3.46945	0.125186	0.09995	0.00238	1632.7	52.04	1628.52	61.877	1623.2	43.92	100.585	1623.2	43.92
Zircon_Sample_065	283.156	81.6991	0.44175	4.00331	0.145221	0.28853	0.00998	0.953517	3.46584	0.119881	0.10063	0.0022	1634.2	49.98	1634.87	59.3054	1635.8	40.32	99.9022	1635.8	40.32
Zircon_Sample_133	180.427	52.201	0.318257	4.02784	0.153004	0.28932	0.01052	0.957208	3.45638	0.125678	0.10097	0.00222	1638.1	52.58	1639.83	62.2918	1642.1	40.36	99.7564	1642.1	40.36
Zircon_Sample_112	215.087	62.4461	0.564582	4.0395	0.150754	0.29033	0.01038	0.957997	3.44436	0.123144	0.10091	0.00216	1643.2	51.88	1642.19	61.2863	1641	39.52	100.134	1641	39.52
Zircon_Sample_113	194.019	56.411	0.648278	4.04695	0.151591	0.29075	0.01042	0.956754	3.43938	0.123262	0.10095	0.0022	1645.3	52	1643.68	61.5696	1641.6	40.08	100.225	1641.6	40.08
Zircon_Sample_073	196.671	57.2156	0.334464	4.05292	0.147491	0.29092	0.01012	0.955892	3.43737	0.119573	0.10104	0.00216	1646.1	50.54	1644.89	59.8597	1643.4	39.36	100.164	1643.4	39.36
Zircon_Sample_093	77.7845	22.6687	0.586879	4.03873	0.155121	0.29143	0.01042	0.930911	3.43136	0.122687	0.10051	0.00282	1648.7	52.02	1642.03	63.0676	1633.5	51.52	100.931	1633.5	51.52
Zircon_Sample_145	330.256	96.5141	0.640176	4.07292	0.155232	0.29224	0.0107	0.960656	3.42185	0.125287	0.10108	0.00214	1652.7	53.4	1648.9	62.8449	1644	39.16	100.529	1644	39.16
Zircon_Sample_159	288.138	84.7672	0.595011	4.15892	0.16263	0.29419	0.01094	0.950972	3.39916	0.126404	0.10253	0.00248	1662.5	54.54	1665.97	65.146	1670.5	44.56	99.5211	1670.5	44.56
Zircon_Sample_080	251.308	74.0805	0.21343	4.16197	0.157161	0.29478	0.01042	0.936106	3.39236	0.119914	0.1024	0.00272	1665.4	51.88	1666.57	62.9314	1668.1	48.88	99.8381	1668.1	48.88
Zircon_Sample_155	197.599	58.503	0.203704	4.19121	0.161827	0.29607	0.01094	0.956997	3.37758	0.124804	0.10267	0.0023	1671.8	54.46	1672.3	64.5694	1673	41.14	99.9283	1673	41.14
Zircon_Sample_132	127.701	37.8609	0.259307	4.20069	0.162521	0.29648	0.01084	0.945029	3.37291	0.123321	0.10276	0.0026	1673.9	53.9	1674.16	64.7716	1674.5	46.34	99.9642	1674.5	46.34
Zircon_Sample_009	255.061	76.753	0.35294	4.27605	0.152196	0.30092	0.01008	0.941131	3.32314	0.111316	0.10306	0.00248	1695.9	49.94	1688.76	60.1074	1680	44.24	100.946	1680	44.24
Zircon_Sample_074	213.984	64.5997	0.313935	4.39639	0.160382	0.30189	0.01052	0.955229	3.31246	0.11543	0.10562	0.00228	1700.7	52.06	1711.66	62.4421	1725.1	39.5	98.5856	1725.1	39.5
Zircon_Sample_130	112.335	34.0408	0.466562	4.46062	0.16963	0.30303	0.011	0.954554	3.3	0.11979	0.10676	0.00242	1706.3	54.46	1723.68	65.5484	1744.9	41.16	97.7878	1744.9	41.16
Zircon_Sample_053	901.962	274.034	0.121993	4.42868	0.158325	0.30382	0.0104	0.95751	3.29142	0.112668	0.10572	0.00218	1710.2	51.46	1717.72	61.4082	1726.9	37.58	99.0329	1726.9	37.58
Zircon_Sample_119	198.285	60.5125	0.378645	4.31975	0.162407	0.30518	0.01098	0.956972	3.27675	0.117894	0.10266	0.00224	1716.9	54.24	1697.14	63.8064	1672.8	40.16	102.636	1672.8	40.16
Zircon_Sample_029	282.876	86.6224	0.559566	4.46325	0.15808	0.30622	0.01034	0.953368	3.26563	0.110269	0.10571	0.00226	1722.1	51	1724.16	61.0668	1726.7	39.14	99.7336	1726.7	39.14
Zircon_Sample_028	321.77	98.587	0.2938	4.47629	0.157772	0.30639	0.01032	0.95564	3.26381	0.109934	0.10596	0.0022	1722.9	50.92	1726.58	60.8553	1731	37.84	99.5321	1731	37.84
Zircon_Sample_128	703.83	217.265	0.169874	4.55628	0.173023	0.30869	0.0112	0.955439	3.2395	0.117537	0.10705	0.0024	1734.3	55.12	1741.31	66.1255	1749.8	40.54	99.1142	1749.8	40.54
Zircon_Sample_138	775.313	239.812	0.198269	4.54752	0.1727	0.30931	0.01128	0.960277	3.233	0.117902	0.10663	0.00226	1737.3	55.5	1739.71	66.0686	1742.5	38.56	99.7016	1742.5	38.56
Zircon_Sample_088	911.241	285.474	0.220752	4.62057	0.169176	0.31328	0.011	0.958998	3.19203	0.11208	0.10697	0.00222	1756.8	54	1752.99	64.1833	1748.4	37.7	100.48	1748.4	37.7
Zircon_Sample_115	533.734	167.523	0.196032	4.6401	0.175461	0.31387	0.0113	0.952083	3.18603	0.114704	0.10722	0.00248	1759.7	55.4	1756.51	66.4209	1752.6	41.98	100.405	1752.6	41.98
Zircon_Sample_075	7.94233	2.5182	0.459378	4.73884	0.19869	0.31706	0.0116	0.872593	3.15398	0.115392	0.1084	0.00444	1775.3	56.78	1774.14	74.3861	1772.7	74.08	100.147	1772.7	74.08
Zircon_Sample_154	283.458	90.1452	0.201659	4.77555	0.184775	0.31802	0.01176	0.955725	3.14446	0.116278	0.10891	0.00248	1780.1	57.54	1780.61	68.8952	1781.2	41.48	99.9382	1781.2	41.48
Zircon_Sample_087	76.6887	24.4484	0.283562	4.73276	0.183377	0.3188	0.01142	0.924522	3.13676	0.112365	0.10767	0.00318	1783.9	55.78	1773.06	68.6995	1760.3	53.36	101.341	1760.3	53.36
Zircon_Sample_085	78.93	25.2442	0.245256	4.80185	0.180522	0.31983	0.01132	0.941466	3.12666	0.110664	0.10889	0.00276	1788.9	55.28	1785.22	67.1143	1780.8	46.02	100.455	1780.8	46.02
Zircon_Sample_052	251.932	80.7466	0.314005	4.86465	0.174229	0.32051	0.01098	0.956513	3.12003	0.106886	0.11008	0.0023	1792.2	53.6	1796.15	64.33	1800.7	37.92	99.528	1800.7	37.92
Zircon_Sample_039	183.112	58.7864	0.270311	4.85853	0.172764	0.32104	0.0109	0.954812	3.11488	0.105757	0.10976	0.00232	1794.8	53.2	1795.09	63.8317	1795.4	38.24	99.9666	1795.4	38.24
Zircon_Sample_125	378.164	121.508	0.44037	4.87236	0.183256	0.32131	0.0116	0.959874	3.11226	0.112359	0.10998	0.00232	1796.1	56.56	1797.49	67.606	1799.1	38.04	99.8332	1799.1	38.04
Zircon_Sample_140	153.427	49.3513	0.249043	4.87855	0.186132	0.32166	0.01176	0.958251	3.10887	0.113661	0.11	0.0024	1797.8	57.32	1798.56	68.6208	1799.4	39.36	99.9111	1799.4	39.36
Zircon_Sample_146	208.167	67.2255	0.205517	4.91711	0.188964	0.32294	0.01186	0.955637	3.09655	0.113721	0.11043	0.0025	1804.1	57.84	1805.2	69.3736	1806.4	40.82	99.8727	1806.4	40.82
Zircon_Sample_046	96.6483	41.5018	2.04654	8.69752	0.316401	0.42941	0.01478	0.94615	2.32878	0.0801549	0.1469	0.00346	2303	66.62	2306.82	83.9181	2310.1	40.04	99.6927	2310.1	40.04
Zircon_Sample_036	244.226	125.227	0.2593	14.0152	0.495735	0.51275	0.01736	0.957177	1.95027	0.0660296	0.19824	0.00406	2668.4	74	2750.73	97.2972	2811.8	33.34	94.9001	2811.8	33.34
Zircon_Sample_067	280.514	150.322	0.498808	14.5314	0.525375	0.53588	0.01856	0.957961	1.86609	0.0646313	0.19667	0.00408	2766.2	77.9	2785.06	100.692	2798.8	33.78	98.8352	2798.8	33.78
Zircon_Sample_012	87.1487	47.1544	0.650343	14.4314	0.515626	0.54108	0.01826	0.944525	1.84816	0.0623703	0.19344	0.00454	2788	76.34	2778.5	99.2741	2771.6	38.16	100.592	2771.6	38.16
7226/11-1 1231.6, Tubåen Formation, Norsel High
Zircon_Sample_068	1404.81	120.154	0.544949	1.01961	0.0341924	0.08553	0.00272	0.948323	11.6918	0.371819	0.08646	0.00184	529	16.16	713.718	23.9343	1348.6	40.74	39.2259
Zircon_Sample_088	666.651	118.85	0.678389	3.06946	0.103714	0.17828	0.00574	0.952872	5.60915	0.180595	0.12487	0.00256	1057.6	31.38	1425.1	48.1527	2027	36.02	52.1756
Zircon_Sample_159	1250.07	117.144	0.11147	0.974094	0.0341984	0.09371	0.00314	0.954417	10.6712	0.357567	0.07539	0.00158	577.4	18.52	690.572	24.2446	1078.8	41.9	53.5224
Zircon_Sample_050	622.423	122.032	0.745545	3.50453	0.116086	0.19606	0.00618	0.951585	5.10048	0.160772	0.12964	0.00264	1154.1	33.26	1528.24	50.6223	2093.1	35.64	55.1383
Zircon_Sample_065	1798.71	175.967	0.110888	0.966338	0.0321652	0.09783	0.0031	0.951989	10.2218	0.323905	0.07164	0.00146	601.7	18.22	686.574	22.8531	975.6	41.46	61.6749
Zircon_Sample_039	499.07	63.5167	0.381666	1.41718	0.0472578	0.12727	0.004	0.942505	7.85731	0.246949	0.08076	0.0018	772.2	22.84	896.177	29.8844	1215.5	43.68	63.5294
Zircon_Sample_140	369.176	78.2653	0.590154	3.44833	0.120378	0.212	0.00704	0.951261	4.71698	0.156639	0.11797	0.00254	1239.5	37.46	1515.49	52.9041	1925.7	38.28	64.3662
Zircon_Sample_012	312.194	102.063	0.632892	8.29393	0.269262	0.32692	0.01008	0.949738	3.05885	0.0943143	0.184	0.00374	1823.4	48.96	2263.66	73.4896	2689.3	33.42	67.802
Zircon_Sample_138	235.46	37.8408	0.383506	1.9575	0.0684331	0.16071	0.00534	0.950459	6.22239	0.206755	0.08834	0.00192	960.7	29.62	1101.02	38.4912	1390	41.42	69.1151
Zircon_Sample_027	28.9433	5.70154	0.942898	2.59632	0.0901575	0.19699	0.00624	0.912213	5.0764	0.160804	0.09559	0.00272	1159.2	33.56	1299.6	45.1288	1539.8	52.92	75.2825
Zircon_Sample_052	170.567	63.1984	0.771669	9.42203	0.312472	0.37052	0.01168	0.950528	2.69891	0.0850784	0.18443	0.0038	2031.8	54.98	2379.98	78.9295	2693.1	33.78	75.4447
Zircon_Sample_090	607.673	134.575	0.317311	3.17227	0.107275	0.22146	0.00714	0.953397	4.51549	0.145582	0.10389	0.00212	1289.6	37.64	1450.43	49.0487	1694.8	37.54	76.0916
Zircon_Sample_117	605.909	129.846	0.309673	2.95477	0.101201	0.2143	0.007	0.953709	4.66636	0.152424	0.1	0.00206	1251.7	37.22	1396.07	47.8154	1624.2	38.04	77.0656
Zircon_Sample_049	485.908	129.208	0.619408	4.40404	0.145618	0.26591	0.00836	0.950838	3.76067	0.118233	0.12012	0.00246	1520	42.6	1713.1	56.6432	1958	36.2	77.6302
Zircon_Sample_133	260.995	74.3235	0.217443	4.92058	0.170255	0.28477	0.0094	0.954001	3.51161	0.115915	0.12532	0.0026	1615.3	47.2	1805.79	62.4817	2033.3	36.54	79.4423
Zircon_Sample_118	163.373	21.3284	0.310984	1.28468	0.0450569	0.13055	0.0043	0.939127	7.6599	0.252299	0.07137	0.00172	791	24.48	838.934	29.4236	968.1	48.84	81.7064
Zircon_Sample_155	122.097	37.4265	0.219146	5.23021	0.190521	0.30653	0.01042	0.933194	3.26232	0.110897	0.12375	0.00324	1723.6	51.38	1857.55	67.665	2011	46.22	85.7086
Zircon_Sample_041	324.168	73.2912	0.256624	2.96832	0.099569	0.22609	0.00712	0.938826	4.42302	0.139289	0.09522	0.0022	1314	37.46	1399.55	46.9462	1532.5	43.36	85.7423
Zircon_Sample_076	299.235	78.0434	0.268512	3.8208	0.129381	0.26081	0.00836	0.946599	3.83421	0.122902	0.10625	0.00232	1494	42.72	1597.14	54.0827	1736	39.62	86.0599
Zircon_Sample_046	38.7741	10.8339	1.14089	4.31249	0.14658	0.27941	0.00886	0.932924	3.57897	0.113488	0.11194	0.00274	1588.4	44.68	1695.75	57.6378	1831.2	43.98	86.7409
Zircon_Sample_021	737.981	159.751	0.271225	2.71756	0.0885734	0.21647	0.0067	0.949626	4.61958	0.142981	0.09105	0.00186	1263.2	35.52	1333.27	43.4552	1447.5	38.58	87.2677
Zircon_Sample_085	445.639	131.41	0.293068	4.75171	0.160056	0.29488	0.00946	0.952407	3.39121	0.108793	0.11687	0.0024	1665.9	47.14	1776.41	59.8365	1908.8	36.5	87.2747
Zircon_Sample_103	961.918	259.506	0.280658	4.00987	0.136198	0.26978	0.00874	0.953806	3.70672	0.120086	0.1078	0.0022	1539.7	44.42	1636.2	55.5747	1762.5	36.82	87.3589
Zircon_Sample_011	460.469	133.076	0.526254	4.52148	0.146714	0.289	0.0089	0.949074	3.46021	0.10656	0.11347	0.00232	1636.5	44.52	1734.93	56.2955	1855.8	36.64	88.183
Zircon_Sample_007	374.619	66.536	0.132028	1.95617	0.0642542	0.17761	0.00548	0.939331	5.63031	0.173718	0.07988	0.0018	1053.9	29.98	1100.57	36.1503	1194	43.94	88.2663
Zircon_Sample_120	152.29	73.014	0.552974	13.422	0.461261	0.47944	0.01572	0.954088	2.08577	0.0683886	0.20304	0.00418	2524.8	68.52	2709.81	93.1254	2850.8	33.32	88.5646
Zircon_Sample_015	461.758	67.3705	0.130793	1.4486	0.0472227	0.1459	0.0045	0.94614	6.85401	0.211399	0.07201	0.00152	877.9	25.36	909.293	29.6419	986.1	42.52	89.0275
Zircon_Sample_126	57.897	8.74303	0.360695	1.44229	0.0520259	0.15101	0.00502	0.921574	6.62208	0.220137	0.06927	0.00194	906.6	28.1	906.672	32.7053	906.7	57.14	99.989	906.6	28.1
Zircon_Sample_151	150.292	22.0719	0.822725	1.41055	0.0502921	0.14686	0.00492	0.939615	6.80921	0.228117	0.06966	0.0017	883.3	27.68	893.389	31.8532	918.2	49.68	96.1991	883.3	27.68
Zircon_Sample_145	257.906	42.8562	0.0451038	1.63703	0.0595551	0.16617	0.00558	0.923037	6.01793	0.202083	0.07145	0.002	991	30.9	984.569	35.8186	970.3	56.46	102.133	970.3	56.46
Zircon_Sample_023	444.844	66.8201	0.0968758	1.49181	0.0488842	0.15021	0.00466	0.946742	6.65735	0.206532	0.07203	0.00152	902.1	26.12	927.054	30.3781	987.1	41.72	91.3889	987.1	41.72
Zircon_Sample_024	31.3201	5.36138	0.292868	1.71471	0.0605937	0.17118	0.00542	0.896002	5.8418	0.184967	0.07265	0.00228	1018.6	29.78	1014.05	35.834	1004.2	63.06	101.434	1004.2	63.06
Zircon_Sample_091	195.41	34.3551	0.278999	1.7783	0.0609541	0.17581	0.00568	0.942553	5.68796	0.183764	0.07336	0.00168	1044	31.18	1037.56	35.564	1024	46.24	101.953	1024	46.24
Zircon_Sample_061	122.477	21.3918	0.153695	1.77389	0.0616698	0.17466	0.0056	0.922249	5.72541	0.18357	0.07366	0.00198	1037.7	30.7	1035.94	36.015	1032.1	53.4	100.543	1032.1	53.4
Zircon_Sample_125	273.529	48.3189	0.111903	1.84062	0.0638463	0.17665	0.00582	0.949813	5.66091	0.186507	0.07557	0.00164	1048.7	31.84	1060.08	36.7715	1083.6	43.02	96.7793	1083.6	43.02
Zircon_Sample_115	200.558	38.7818	0.325282	2.03483	0.0725361	0.19337	0.00638	0.925563	5.17143	0.170625	0.07632	0.00206	1139.6	34.5	1127.23	40.1827	1103.6	53.3	103.262	1103.6	53.3
Zircon_Sample_029	195.3	38.2377	0.295173	2.10322	0.0694291	0.19579	0.0061	0.943807	5.10751	0.159129	0.07791	0.0017	1152.7	32.92	1149.86	37.9579	1144.5	43.12	100.716	1144.5	43.12
Zircon_Sample_055	171.489	33.8829	0.295225	2.12599	0.0726565	0.19758	0.00628	0.930044	5.06124	0.160869	0.07804	0.00196	1162.3	33.84	1157.28	39.5506	1147.8	49.38	101.263	1147.8	49.38
Zircon_Sample_051	317.863	63.8206	0.151464	2.17731	0.0722849	0.20078	0.00632	0.948134	4.98058	0.156775	0.07865	0.00166	1179.5	33.98	1173.82	38.9698	1163.3	41.48	101.393	1163.3	41.48
Zircon_Sample_158	306.878	61.3019	0.32619	2.169	0.0779074	0.19976	0.00674	0.939362	5.00601	0.168905	0.07875	0.00194	1174	36.2	1171.16	42.0664	1165.8	48.58	100.703	1165.8	48.58
Zircon_Sample_146	236.057	47.6575	0.347203	2.21162	0.0777041	0.20189	0.00674	0.950191	4.95319	0.16536	0.07945	0.00174	1185.5	36.1	1184.72	41.6247	1183.5	43.02	100.169	1183.5	43.02
Zircon_Sample_047	265.646	55.1959	0.240611	2.3002	0.0763858	0.20778	0.00654	0.947824	4.81278	0.151485	0.08029	0.0017	1217	34.88	1212.35	40.2601	1204	41.46	101.08	1204	41.46
Zircon_Sample_150	176.657	32.4625	0.219501	2.04266	0.0719601	0.18376	0.00614	0.948464	5.44188	0.18183	0.08062	0.0018	1087.5	33.46	1129.85	39.8031	1212.3	43.56	89.7055	1212.3	43.56
Zircon_Sample_066	200.105	42.2022	0.173363	2.37197	0.0798872	0.2109	0.00672	0.946071	4.74158	0.151083	0.08157	0.00178	1233.6	35.74	1234.19	41.5673	1235.2	42.28	99.8705	1235.2	42.28
Zircon_Sample_081	89.8751	18.4316	0.25245	2.33705	0.0805653	0.20508	0.00662	0.936385	4.87615	0.157402	0.08265	0.002	1202.6	35.38	1223.62	42.1821	1261	46.68	95.3688	1261	46.68
Zircon_Sample_060	120.842	27.2414	0.348555	2.58201	0.0885758	0.22543	0.0072	0.931028	4.43597	0.14168	0.08307	0.00208	1310.5	37.88	1295.55	44.4439	1270.8	48.4	103.124	1270.8	48.4
Zircon_Sample_116	323.124	70.5994	0.0624323	2.50794	0.086449	0.21849	0.00716	0.95069	4.57687	0.149986	0.08325	0.00178	1273.9	37.84	1274.34	43.9265	1274.8	41.48	99.9294	1274.8	41.48
Zircon_Sample_063	605.102	134.472	0.18909	2.58335	0.0863862	0.22223	0.00706	0.950038	4.49984	0.142955	0.08431	0.00176	1293.7	37.18	1295.93	43.3354	1299.6	40.32	99.546	1299.6	40.32
Zircon_Sample_079	162.757	37.434	0.462262	2.71236	0.092636	0.23	0.0074	0.942045	4.34783	0.139887	0.08553	0.00196	1334.5	38.76	1331.85	45.4869	1327.5	44.36	100.527	1327.5	44.36
Zircon_Sample_092	366.404	86.343	0.2234	2.85925	0.0968384	0.23565	0.0076	0.952248	4.24358	0.136861	0.088	0.00182	1364	39.64	1371.25	46.4421	1382.5	39.62	98.6618	1382.5	39.62
Zircon_Sample_107	688.148	173.255	0.360804	3.15169	0.107923	0.25177	0.0082	0.95113	3.97188	0.129362	0.09079	0.00192	1447.6	42.2	1445.41	49.4951	1442.1	40	100.381	1442.1	40
Zircon_Sample_119	504.896	128.228	0.319	3.18308	0.109562	0.25397	0.00832	0.951765	3.93747	0.128991	0.0909	0.00192	1458.9	42.8	1453.06	50.0144	1444.4	39.82	101.004	1444.4	39.82
Zircon_Sample_130	9.45455	2.25831	0.139089	3.00589	0.120942	0.23886	0.00824	0.857389	4.18655	0.144424	0.09127	0.00378	1380.8	42.88	1409.11	56.6959	1452.1	77.84	95.0899	1452.1	77.84
Zircon_Sample_020	196.191	50.2446	0.230136	3.24226	0.109618	0.2561	0.00802	0.926258	3.90472	0.12228	0.09182	0.00234	1469.9	41.16	1467.33	49.6089	1463.5	48.42	100.437	1463.5	48.42
Zircon_Sample_067	67.7897	17.3155	0.534806	3.26195	0.110811	0.25543	0.00816	0.940399	3.91497	0.125068	0.09262	0.00214	1466.4	41.92	1472.03	50.0061	1479.9	43.86	99.0878	1479.9	43.86
Zircon_Sample_086	112.742	30.0355	0.384737	3.44736	0.119516	0.26641	0.00864	0.935455	3.75361	0.121734	0.09385	0.0023	1522.5	43.94	1515.27	52.5326	1505	45.9	101.163	1505	45.9
Zircon_Sample_008	172.937	46.3472	0.344726	3.49786	0.114206	0.268	0.00826	0.943972	3.73134	0.115003	0.09466	0.00204	1530.6	42	1526.73	49.8481	1521.3	40.5	100.611	1521.3	40.5
Zircon_Sample_142	193.666	51.5695	0.38839	3.47725	0.121609	0.26628	0.00886	0.951404	3.75545	0.124956	0.09471	0.00204	1521.9	45.08	1522.07	53.231	1522.2	40.2	99.9803	1522.2	40.2
Zircon_Sample_132	317.787	84.7792	0.224438	3.48562	0.122381	0.26678	0.00884	0.943763	3.74841	0.124207	0.09476	0.0022	1524.5	45.02	1523.96	53.507	1523.3	43.3	100.079	1523.3	43.3
Zircon_Sample_078	194.628	52.1816	0.217138	3.50743	0.118291	0.26811	0.00858	0.948881	3.72981	0.119361	0.09488	0.00202	1531.2	43.66	1528.89	51.5631	1525.8	39.9	100.354	1525.8	39.9
Zircon_Sample_111	167.823	44.8172	0.286341	3.50608	0.121203	0.26705	0.00874	0.946732	3.74462	0.122554	0.09522	0.00212	1525.8	44.44	1528.59	52.8423	1532.5	41.42	99.5628	1532.5	41.42
Zircon_Sample_059	120.163	31.3036	0.253008	3.42632	0.114999	0.26051	0.00826	0.944692	3.83862	0.121711	0.09539	0.0021	1492.5	42.3	1510.45	50.6959	1535.7	41.24	97.187	1535.7	41.24
Zircon_Sample_026	149.649	41.508	0.510271	3.6955	0.122942	0.27737	0.00866	0.938496	3.60529	0.112564	0.09663	0.00222	1578.1	43.74	1570.4	52.2438	1560	42.94	101.16	1560	42.94
Zircon_Sample_094	411.151	111.846	0.27329	3.63485	0.123398	0.27203	0.00878	0.950726	3.67607	0.118648	0.09691	0.00204	1551.1	44.54	1557.2	52.8647	1565.4	39.02	99.0865	1565.4	39.02
Zircon_Sample_129	216.042	58.4501	0.360429	3.62179	0.125439	0.27055	0.00892	0.951934	3.69617	0.121862	0.09709	0.00206	1543.6	45.28	1554.33	53.8337	1569	39.52	98.3811	1569	39.52
Zircon_Sample_074	596.77	162.912	0.337763	3.65558	0.122315	0.27299	0.0087	0.952464	3.66314	0.116742	0.09712	0.00198	1555.9	44.1	1561.73	52.2552	1569.5	38.08	99.1335	1569.5	38.08
Zircon_Sample_038	435.895	122.443	0.219342	3.81069	0.12587	0.2809	0.0088	0.948448	3.55999	0.111527	0.09839	0.00206	1595.9	44.24	1595.01	52.6841	1593.8	38.72	100.132	1593.8	38.72
Zircon_Sample_152	42.796	12.0295	0.340325	3.81521	0.138296	0.28109	0.0095	0.932366	3.55758	0.120236	0.09844	0.00258	1596.8	47.8	1595.96	57.8513	1594.7	48.6	100.132	1594.7	48.6
Zircon_Sample_010	69.8164	19.691	0.560941	3.84405	0.126578	0.28204	0.00872	0.938937	3.5456	0.109621	0.09885	0.00224	1601.6	43.88	1602.02	52.7518	1602.5	41.88	99.9438	1602.5	41.88
Zircon_Sample_022	202.902	58.0461	0.77695	3.94999	0.129799	0.28608	0.00888	0.944607	3.49553	0.108502	0.10014	0.00216	1621.9	44.56	1623.99	53.3651	1626.7	39.9	99.7049	1626.7	39.9
Zircon_Sample_131	416.724	107.769	0.413645	3.57285	0.123676	0.25861	0.00854	0.953988	3.86683	0.127693	0.1002	0.00208	1482.7	43.7	1543.52	53.4296	1627.8	38.24	91.0861	1627.8	38.24
Zircon_Sample_153	196.905	55.9624	0.53634	3.93867	0.13817	0.28421	0.0095	0.952842	3.51853	0.11761	0.10051	0.00214	1612.5	47.74	1621.66	56.8885	1633.6	39.32	98.7084	1633.6	39.32
Zircon_Sample_034	275.659	79.5084	0.265871	3.99954	0.132117	0.28843	0.00902	0.946712	3.46705	0.108424	0.10057	0.00214	1633.7	45.1	1634.1	53.9794	1634.7	39.14	99.9388	1634.7	39.14
Zircon_Sample_053	423.677	114.922	0.383175	3.77029	0.125062	0.27125	0.00856	0.951379	3.68664	0.116341	0.10081	0.00206	1547.1	43.38	1586.44	52.6229	1639.1	37.8	94.3872	1639.1	37.8
Zircon_Sample_042	74.6667	21.9102	0.278964	4.09288	0.140385	0.29344	0.00932	0.92599	3.40785	0.108237	0.10116	0.00262	1658.7	46.46	1652.89	56.6935	1645.6	47.7	100.796	1645.6	47.7
Zircon_Sample_106	257.261	75.6346	0.317933	4.12137	0.140859	0.294	0.00956	0.95141	3.40136	0.110602	0.10167	0.00214	1661.5	47.66	1658.55	56.6854	1654.8	38.68	100.405	1654.8	38.68
Zircon_Sample_087	134.869	39.139	0.507189	4.0757	0.138756	0.2902	0.00936	0.947388	3.4459	0.111143	0.10186	0.00222	1642.5	46.74	1649.45	56.1553	1658.4	39.92	99.0412	1658.4	39.92
Zircon_Sample_054	250.604	73.878	0.55468	4.16673	0.139775	0.2948	0.00934	0.944466	3.39213	0.107471	0.10251	0.00226	1665.5	46.48	1667.5	55.937	1670.1	40.52	99.7246	1670.1	40.52
Zircon_Sample_114	146.483	43.8423	0.367143	4.26334	0.15076	0.2993	0.00988	0.933497	3.34113	0.110292	0.10331	0.00262	1687.8	49.04	1686.31	59.6315	1684.4	46.4	100.202	1684.4	46.4
Zircon_Sample_037	313.185	93.8585	0.231036	4.29906	0.141362	0.29969	0.00936	0.949829	3.33678	0.104215	0.10404	0.00214	1689.8	46.48	1693.18	55.6752	1697.4	37.76	99.5523	1697.4	37.76
Zircon_Sample_093	187.316	56.5751	0.228899	4.34762	0.148837	0.30203	0.00978	0.945864	3.31093	0.107211	0.1044	0.00232	1701.4	48.44	1702.44	58.2818	1703.7	40.78	99.865	1703.7	40.78
Zircon_Sample_128	84.4194	26.1557	0.392103	4.5321	0.159716	0.30983	0.01028	0.9415	3.22758	0.107089	0.10609	0.00252	1739.9	50.56	1736.88	61.2096	1733.4	43.22	100.375	1733.4	43.22
Zircon_Sample_072	620.819	197.961	0.273301	4.68939	0.157738	0.31887	0.01018	0.949105	3.13607	0.10012	0.10666	0.00226	1784.2	49.76	1765.35	59.3814	1743.1	38.44	102.358	1743.1	38.44
Zircon_Sample_075	176.919	55.1971	0.442019	4.60499	0.156367	0.31199	0.01	0.943937	3.20523	0.102735	0.10705	0.0024	1750.5	49.18	1750.17	59.4288	1749.8	40.6	100.04	1749.8	40.6
Zircon_Sample_073	567.838	177.228	0.198196	4.63559	0.15532	0.31211	0.00996	0.952425	3.204	0.102245	0.10772	0.0022	1751.1	48.88	1755.7	58.8263	1761.1	36.88	99.4322	1761.1	36.88
Zircon_Sample_105	310.313	99.0086	0.417071	4.74542	0.162324	0.31906	0.01038	0.951077	3.13421	0.101965	0.10787	0.00228	1785.1	50.72	1775.3	60.7268	1763.7	38.22	101.213	1763.7	38.22
Zircon_Sample_009	28.4496	8.72491	0.743308	4.57778	0.154011	0.30668	0.00956	0.926561	3.26073	0.101645	0.10826	0.00274	1724.4	47.16	1745.23	58.7153	1770.2	45.9	97.4127	1770.2	45.9
Zircon_Sample_016	628.749	198.081	0.792866	4.7043	0.15364	0.31504	0.00974	0.946636	3.1742	0.0981358	0.1083	0.00228	1765.5	47.78	1768.01	57.7423	1770.9	38.36	99.6951	1770.9	38.36
Zircon_Sample_080	90.5522	29.0682	0.219802	4.79389	0.167935	0.32101	0.01044	0.928386	3.11517	0.101313	0.10831	0.00282	1794.7	50.9	1783.83	62.4895	1771.1	47.38	101.333	1771.1	47.38
Zircon_Sample_064	362.865	115.591	0.177924	4.76418	0.161123	0.31855	0.01016	0.943079	3.13922	0.100124	0.10847	0.00244	1782.7	49.68	1778.61	60.1518	1773.8	41	100.502	1773.8	41
Zircon_Sample_141	182.225	58.7074	0.226801	4.88718	0.172123	0.32217	0.01074	0.946537	3.10395	0.103475	0.11002	0.0025	1800.3	52.38	1800.05	63.3965	1799.8	41.06	100.028	1799.8	41.06
Zircon_Sample_089	322.792	106.237	0.306252	5.08745	0.173977	0.32912	0.01064	0.945355	3.03841	0.0982275	0.11211	0.0025	1834.1	51.62	1834.01	62.7184	1833.9	40.22	100.011	1833.9	40.22
Zircon_Sample_113	131.64	45.1315	0.407655	5.49381	0.190309	0.34284	0.01124	0.946431	2.91681	0.0956276	0.11622	0.0026	1900.3	53.98	1899.63	65.8044	1898.8	40.08	100.079	1898.8	40.08
Zircon_Sample_014	237.029	81.0853	0.266892	5.48651	0.178571	0.34209	0.01056	0.948437	2.92321	0.0902367	0.11632	0.0024	1896.7	50.72	1898.49	61.7906	1900.5	36.78	99.8001	1900.5	36.78
Zircon_Sample_013	60.8489	20.8681	0.808806	5.50125	0.18495	0.34295	0.01072	0.929761	2.91588	0.0911451	0.11634	0.00288	1900.8	51.42	1900.79	63.9038	1900.7	44.08	100.005	1900.7	44.08
Zircon_Sample_124	396.691	134.796	0.127815	5.45259	0.188717	0.3398	0.01118	0.950629	2.94291	0.0968267	0.11638	0.0025	1885.7	53.82	1893.16	65.5233	1901.3	38.38	99.1795	1901.3	38.38
Zircon_Sample_062	368.96	127.169	0.324184	5.53121	0.184593	0.34467	0.01094	0.951083	2.90133	0.0920896	0.11639	0.0024	1909.1	52.4	1905.46	63.591	1901.5	36.98	100.4	1901.5	36.98
Zircon_Sample_156	133.516	46.577	0.285608	5.63293	0.200842	0.34885	0.01176	0.945471	2.86656	0.096634	0.11711	0.00272	1929.1	56.18	1921.15	68.4986	1912.5	41.52	100.868	1912.5	41.52
Zircon_Sample_028	274.827	95.0818	0.571563	5.61409	0.183897	0.34597	0.01076	0.949466	2.89042	0.089895	0.11769	0.00242	1915.3	51.56	1918.26	62.8352	1921.5	36.74	99.6773	1921.5	36.74
Zircon_Sample_157	152.584	52.7438	0.432426	5.61923	0.197758	0.34567	0.0116	0.953542	2.89293	0.0970811	0.1179	0.0025	1913.9	55.54	1919.05	67.5372	1924.7	37.82	99.4389	1924.7	37.82
Zircon_Sample_144	109.982	39.8707	0.59703	6.12807	0.215383	0.36252	0.0121	0.949655	2.75847	0.0920707	0.1226	0.0027	1994.1	57.22	1994.25	70.0919	1994.4	38.78	99.985	1994.4	38.78
Zircon_Sample_025	38.3678	19.5465	0.405587	12.3368	0.413557	0.50945	0.01602	0.938052	1.9629	0.0617248	0.17563	0.00408	2654.3	68.42	2630.38	88.1763	2612	38.36	101.619	2612	38.36
Zircon_Sample_033	382.382	196.476	0.245861	12.8613	0.421868	0.51382	0.01602	0.950516	1.94621	0.0606793	0.18154	0.0037	2672.9	68.26	2669.54	87.5647	2667	33.54	100.221	2667	33.54
Zircon_Sample_104	252.639	130.281	0.276558	13.0209	0.443103	0.51568	0.01674	0.953918	1.93919	0.0629499	0.18313	0.00374	2680.8	71.22	2681.17	91.2406	2681.4	33.56	99.9776	2681.4	33.56
Zircon_Sample_139	222.148	115.862	0.520943	13.2065	0.462069	0.52155	0.01736	0.951339	1.91736	0.0638202	0.18365	0.00396	2705.8	73.52	2694.52	94.2758	2686.1	35.34	100.733	2686.1	35.34
Zircon_Sample_048	167.878	86.8095	0.747726	13.1651	0.43721	0.5171	0.0163	0.94918	1.93386	0.0609591	0.18465	0.00386	2686.9	69.26	2691.56	89.3858	2695.1	34.28	99.6957	2695.1	34.28
7131/4-1 941.5, Fruholmen Formation, Finnmark Platform
185_022	1480.5	71.4636	0.776637	0.586946	0.0114879	0.04827	0.00084	0.889116	20.7168	0.360516	0.08819	0.00158	303.9	5.22	468.915	9.17779	1386.7	34.08	21.9153
185_097	1577.2	115.545	0.212238	0.880108	0.016199	0.07326	0.00124	0.919605	13.65	0.23104	0.08713	0.00126	455.8	7.4	641.041	11.7988	1363.5	27.72	33.4287
185_031	172.359	17.4824	0.827992	1.40537	0.0480102	0.10143	0.00266	0.767666	9.85902	0.258553	0.10049	0.0044	622.8	15.6	891.205	30.4453	1633.2	80.12	38.1337
185_052	1213.11	167.555	0.511912	2.01885	0.0346544	0.13812	0.00226	0.95323	7.24008	0.118466	0.10601	0.0011	834	12.76	1121.87	19.2574	1731.9	19.18	48.1552
185_047	9.65778	1.71001	1.35792	2.82654	0.124042	0.17706	0.00596	0.767031	5.6478	0.19011	0.11578	0.00652	1050.9	32.64	1362.6	59.7975	1892.1	99.5	55.5415
185_028	253.407	47.6203	0.402102	2.78615	0.0511719	0.18792	0.0032	0.927149	5.32141	0.0906158	0.10753	0.00148	1110.1	17.36	1351.83	24.8284	1758	24.84	63.1456
185_048	108.889	10.8955	0.545184	0.959945	0.0275194	0.10006	0.0022	0.766955	9.994	0.219736	0.06958	0.00256	614.8	12.86	683.268	19.5877	915.9	74.9	67.1252
185_023	81.9069	11.9355	0.737095	1.66381	0.0668756	0.14572	0.0043	0.73415	6.86248	0.202502	0.08281	0.00452	877	24.22	994.828	39.9864	1264.7	104.54	69.3445
185_043	784.318	142.558	0.446118	2.39183	0.041168	0.18176	0.00298	0.952552	5.50176	0.0902027	0.09544	0.001	1076.6	16.22	1240.16	21.3455	1536.8	19.84	70.0547
185_081	173.747	48.6613	0.604985	5.35875	0.0969869	0.28007	0.00474	0.935109	3.57054	0.060429	0.13877	0.00178	1591.7	23.86	1878.29	33.9947	2212	22.18	71.9575
185_007	408.619	53.9377	0.0468508	1.38121	0.0341798	0.132	0.00266	0.814326	7.57576	0.152663	0.07589	0.00218	799.3	15.12	880.955	21.8003	1092.2	56.84	73.1826
185_054	437.606	104.242	0.204854	3.62733	0.0630696	0.23821	0.00392	0.946442	4.19798	0.0690822	0.11044	0.00124	1377.4	20.44	1555.55	27.0468	1806.6	20.22	76.2427
185_057	320.883	41.8206	0.379611	1.31001	0.0245528	0.13033	0.00222	0.908826	7.67283	0.130697	0.0729	0.00114	789.7	12.66	850.129	15.9336	1011.1	31.5	78.1031
185_100	131.817	18.7509	0.504647	1.47728	0.0359153	0.14225	0.00282	0.815421	7.02988	0.139362	0.07532	0.00212	857.4	15.96	921.118	22.3939	1076.9	56.12	79.6174
185_049	976.034	148.787	0.0557284	1.6243	0.0299046	0.15244	0.00258	0.919284	6.55996	0.111025	0.07728	0.00112	914.6	14.42	979.658	18.0362	1128.4	28.9	81.0528
185_029	178.244	47.404	1.11841	4.19605	0.0816046	0.26595	0.00472	0.912575	3.76011	0.0667332	0.11443	0.00182	1520.2	24	1673.25	32.5413	1871	28.62	81.2507
185_104	80.7461	14.0159	0.44316	1.9697	0.0497509	0.17358	0.00358	0.816551	5.76103	0.118818	0.0823	0.0024	1031.8	19.62	1105.21	27.9154	1252.7	56.36	82.3661
185_099	482.36	112.279	0.325762	3.22355	0.0570393	0.23277	0.00386	0.937176	4.29609	0.0712415	0.10044	0.00124	1349	20.16	1462.84	25.8842	1632.3	22.82	82.6441
185_136	99.5114	14.8949	1.00432	1.55548	0.0403841	0.14968	0.0031	0.797721	6.68092	0.138368	0.07537	0.00236	899.2	17.38	952.672	24.7338	1078.3	62.06	83.3905
185_053	103.194	29.8767	0.753296	4.80785	0.103614	0.28952	0.00552	0.884694	3.45399	0.065854	0.12044	0.00242	1639.1	27.62	1786.27	38.496	1962.7	35.48	83.5125
185_116	76.0578	15.2139	0.624356	2.45491	0.0515893	0.20003	0.00366	0.870685	4.99925	0.0914726	0.08901	0.00184	1175.5	19.7	1258.87	26.4548	1404.4	39.24	83.7012
185_017	684.224	173.512	0.644561	3.70279	0.0632269	0.25359	0.00414	0.956084	3.94337	0.0643778	0.1059	0.00106	1457	21.3	1571.97	26.8421	1729.9	18.3	84.2245
185_131	25.3225	4.70594	0.586778	2.16161	0.0625012	0.18584	0.00422	0.785348	5.38097	0.12219	0.08436	0.00302	1098.8	22.98	1168.79	33.7946	1300.8	68.82	84.4711
185_074	859.225	193.901	0.489228	2.9933	0.0528955	0.22567	0.00374	0.937842	4.43125	0.0734385	0.0962	0.00118	1311.8	19.7	1405.92	24.8444	1551.6	22.84	84.545
185_018	434.754	105.806	0.595887	3.41632	0.0599584	0.24337	0.00404	0.945852	4.10897	0.0682099	0.10181	0.00116	1404.2	20.94	1508.16	26.469	1657.5	21.16	84.7179
185_101	104.267	32.0226	0.747182	5.27839	0.0993872	0.30712	0.00532	0.919973	3.25606	0.0564021	0.12465	0.00184	1726.5	26.26	1865.37	35.1232	2023.8	26.16	85.3098
185_025	420.015	100.942	0.190043	3.31234	0.0594661	0.24033	0.00404	0.936353	4.16095	0.0699464	0.09996	0.00126	1388.4	20.98	1483.96	26.6414	1623.3	23.38	85.5295
185_095	73.5092	12.021	0.407252	1.74563	0.038875	0.16353	0.00308	0.845736	6.11509	0.115174	0.07742	0.00184	976.3	17.08	1025.55	22.8388	1132.1	47.04	86.238
185_063	154.833	42.9305	0.289458	4.25232	0.0826505	0.27727	0.0049	0.90923	3.60659	0.0637368	0.11123	0.0018	1577.6	24.76	1684.19	32.7348	1819.6	29.16	86.7004
185_139	273.989	72.5961	0.737399	3.90352	0.0741253	0.26496	0.00458	0.910279	3.77415	0.0652386	0.10685	0.00168	1515.2	23.32	1614.41	30.6566	1746.3	28.78	86.7663
185_127	80.5807	22.5094	0.542621	4.28907	0.101208	0.27934	0.00564	0.855648	3.57987	0.0722791	0.11136	0.00272	1588	28.44	1691.27	39.9082	1821.7	44.08	87.1713
185_019	298.809	78.7721	1.06277	3.84743	0.0690981	0.26362	0.00444	0.937798	3.79334	0.063889	0.10585	0.00132	1508.4	22.64	1602.73	28.7843	1729.1	22.86	87.2361
185_032	191.762	36.1107	0.462868	2.15555	0.0425842	0.18831	0.00332	0.892429	5.31039	0.0936249	0.08302	0.00148	1112.2	18.06	1166.84	23.0517	1269.7	34.28	87.5955
185_068	153.582	29.6812	0.343067	2.24525	0.0509129	0.19326	0.00372	0.848864	5.17438	0.0995999	0.08426	0.00202	1139	20.08	1195.3	27.1044	1298.5	46.38	87.7166
185_051	84.9743	15.3022	0.379123	2.0015	0.0476595	0.18008	0.00356	0.830215	5.55309	0.109779	0.08061	0.00214	1067.4	19.48	1116.02	26.5746	1211.9	51.74	88.0766
185_062	64.1521	10.4183	0.521679	1.70625	0.0475333	0.1624	0.00356	0.786879	6.15764	0.134983	0.0762	0.00262	970.1	19.7	1010.88	28.1614	1100.2	67.9	88.1749
185_010	122.711	37.2096	0.118951	4.90842	0.104905	0.30323	0.00576	0.888784	3.29783	0.0626438	0.1174	0.0023	1707.3	28.5	1803.7	38.5496	1917	35.02	89.061
185_061	300.606	72.9751	0.451131	3.24843	0.0600199	0.24276	0.00414	0.923001	4.11929	0.07025	0.09705	0.00138	1401	21.5	1468.8	27.1384	1568.1	26.72	89.3438
185_034	112.465	51.8059	0.460135	11.9709	0.216786	0.46064	0.00788	0.944631	2.17089	0.0371367	0.18848	0.00224	2442.4	34.8	2602.13	47.1229	2729	19.54	89.498
185_013	355.234	56.5569	0.0449845	1.56956	0.0286097	0.15921	0.00268	0.923481	6.28101	0.105729	0.0715	0.001	952.4	14.88	958.252	17.4669	971.6	28.22	98.0239	952.4	14.88
185_065	282.761	45.0467	0.274154	1.60525	0.0326961	0.15931	0.00284	0.875231	6.27707	0.111901	0.07308	0.00144	952.9	15.82	972.259	19.8032	1016.1	39.76	93.7801	952.9	15.82
185_117	327.733	53.1124	0.42114	1.59743	0.0297662	0.16206	0.00274	0.907348	6.17055	0.104328	0.07149	0.00112	968.2	15.22	969.207	18.06	971.4	32.02	99.6706	968.2	15.22
185_011	129.04	21.2748	0.226204	1.66264	0.0372847	0.16487	0.00312	0.84388	6.06538	0.114781	0.07314	0.00176	983.8	17.24	994.382	22.299	1017.7	48.16	96.669	983.8	17.24
185_006	339.506	57.7025	0.325522	1.73529	0.0311873	0.16996	0.00284	0.929752	5.88374	0.0983162	0.07405	0.00098	1011.9	15.66	1021.72	18.3626	1042.7	25.88	97.0461	1011.9	15.66
185_050	161.807	27.5783	0.248067	1.71928	0.0349108	0.17044	0.00304	0.878393	5.86717	0.104648	0.07316	0.00142	1014.5	16.74	1015.76	20.6254	1018.5	39.18	99.6073	1014.5	16.74
185_115	269.179	47.4562	0.434837	1.80829	0.0338469	0.1763	0.003	0.909115	5.67215	0.0965198	0.07439	0.00116	1046.7	16.38	1048.46	19.6247	1052.2	31.16	99.4773	1046.7	16.38
185_078	91.7196	16.3811	1.1037	1.82646	0.0391521	0.1786	0.00328	0.856738	5.5991	0.102828	0.07417	0.00164	1059.3	18	1055.01	22.6152	1046.1	44.32	101.262	1059.3	18
185_085	100.862	18.1511	0.277355	1.84881	0.0378347	0.17996	0.00322	0.874342	5.55679	0.0994269	0.07451	0.00148	1066.8	17.62	1063.01	21.7537	1055.1	40.5	101.109	1066.8	17.62
185_091	89.8822	16.3541	0.547025	1.88405	0.0414229	0.18195	0.0034	0.849924	5.49602	0.102701	0.0751	0.00174	1077.6	18.54	1075.49	23.6458	1071.1	46.14	100.607	1077.6	18.54
185_036	33.1324	6.07813	0.301144	1.9226	0.0732096	0.18345	0.00514	0.735813	5.45108	0.152731	0.07601	0.00392	1085.8	27.98	1088.97	41.4663	1095.3	101.46	99.1327	1085.8	27.98
185_125	99.1971	18.2433	0.267683	1.9898	0.0494063	0.18391	0.00372	0.81464	5.43744	0.109985	0.07847	0.00226	1088.3	20.28	1112.06	27.612	1158.8	56.46	93.9161	1088.3	20.28
185_046	214.376	39.4431	0.22098	1.93232	0.0394153	0.18399	0.0033	0.879294	5.43508	0.0974822	0.07617	0.00148	1088.7	17.94	1092.34	22.2815	1099.6	38.7	99.0087	1088.7	17.94
185_024	325.894	60.5413	0.276143	2.02325	0.0377873	0.18577	0.00318	0.916546	5.383	0.0921459	0.07899	0.00118	1098.4	17.24	1123.35	20.9803	1171.8	29.56	93.7361	1098.4	17.24
185_064	227.769	43.0643	0.386076	2.0498	0.043175	0.18907	0.00346	0.868828	5.28905	0.0967901	0.07863	0.00164	1116.4	18.7	1132.23	23.8481	1162.9	40.96	96.0014	1116.4	18.7
185_033	299.881	56.7196	0.167212	2.07612	0.0377377	0.18914	0.00318	0.924955	5.28709	0.0888915	0.07961	0.0011	1116.7	17.26	1140.95	20.7392	1187.3	26.98	94.0537	1116.7	17.26
185_102	574.078	108.696	0.20153	1.99556	0.0351901	0.18934	0.00312	0.93445	5.2815	0.0870302	0.07644	0.00096	1117.8	16.92	1114.01	19.6446	1106.6	24.98	101.012	1117.8	16.92
185_016	173.281	33.2838	1.38739	2.13011	0.0438987	0.19208	0.00348	0.879117	5.20616	0.0943224	0.08043	0.00158	1132.6	18.82	1158.62	23.8776	1207.5	38.64	93.7971	1132.6	18.82
185_118	200.976	38.8607	0.395346	2.07738	0.0415792	0.19336	0.00342	0.883689	5.1717	0.091473	0.07792	0.00146	1139.5	18.46	1141.37	22.8448	1144.8	37.18	99.537	1139.5	18.46
185_111	327.641	63.4084	0.517109	2.09149	0.0446611	0.19353	0.00356	0.861443	5.16716	0.0950503	0.07838	0.0017	1140.5	19.22	1146.01	24.4717	1156.4	42.8	98.625	1140.5	19.22
185_070	257.619	50.1146	0.360778	2.10873	0.0387032	0.19453	0.00328	0.918674	5.1406	0.0866764	0.07862	0.00114	1145.8	17.74	1151.66	21.1374	1162.5	28.5	98.5634	1145.8	17.74
185_008	175.933	34.46	0.325234	2.17322	0.042039	0.19587	0.00342	0.902629	5.10543	0.0891436	0.08047	0.00134	1153.1	18.4	1172.51	22.6812	1208.6	32.54	95.4079	1153.1	18.4
185_110	376.802	75.0025	0.726098	2.15882	0.039877	0.19905	0.00336	0.913845	5.02386	0.0848037	0.07866	0.00118	1170.2	18.08	1167.89	21.5729	1163.7	29.4	100.559	1170.2	18.08
185_059	225.679	44.9891	0.256833	2.26213	0.0424966	0.19935	0.00342	0.913215	5.0163	0.0860585	0.0823	0.00126	1171.8	18.36	1200.57	22.554	1252.8	29.92	93.5345	1171.8	18.36
185_009	542.986	110.264	0.228235	2.33234	0.0428243	0.20307	0.00344	0.922602	4.92441	0.0834194	0.0833	0.00118	1191.8	18.46	1222.19	22.4407	1276.2	27.5	93.3866	1191.8	18.46
185_077	115.94	23.6471	0.307014	2.2596	0.0444039	0.20396	0.00358	0.8932	4.90292	0.0860584	0.08035	0.00142	1196.6	19.16	1199.78	23.5772	1205.7	34.52	99.2453	1196.6	19.16
185_129	450.969	95.0056	0.399399	2.37896	0.0466532	0.21067	0.00368	0.890741	4.74676	0.0829168	0.0819	0.00146	1232.4	19.64	1236.3	24.2447	1243.1	34.76	99.1392	1232.4	19.64
185_066	178.676	37.6827	0.344023	2.37662	0.0443939	0.2109	0.0036	0.913823	4.74158	0.0809374	0.08173	0.00124	1233.6	19.18	1235.59	23.0802	1239.1	29.56	99.5561	1233.6	19.18
185_069	54.6778	11.6004	0.549648	2.41539	0.0560986	0.21216	0.00414	0.84018	4.71342	0.0919757	0.08257	0.00208	1240.3	22.04	1247.19	28.9665	1259.1	48.38	98.5069	1240.3	22.04
185_098	561.291	119.398	0.386024	2.41033	0.0425977	0.21272	0.00352	0.936319	4.70102	0.0777904	0.08218	0.00102	1243.3	18.68	1245.68	22.0149	1249.8	24.38	99.4799	1243.3	18.68
185_037	108.303	23.0566	0.685044	2.43632	0.0493489	0.21289	0.00382	0.88586	4.69726	0.0842855	0.083	0.00156	1244.2	20.28	1253.39	25.3881	1269.3	36.02	98.0225	1244.2	20.28
185_113	425.405	91.0495	0.39805	2.41218	0.0428531	0.21403	0.00354	0.931015	4.67224	0.0772777	0.08174	0.00106	1250.2	18.84	1246.23	22.1397	1239.4	25.34	100.871	1250.2	18.84
185_094	99.8993	21.4334	0.401963	2.43224	0.0497484	0.21455	0.00386	0.879603	4.66092	0.0838553	0.08222	0.0016	1253	20.46	1252.19	25.6118	1250.8	37.74	100.176	1250.8	37.74
185_133	249.967	54.2404	0.30226	2.48953	0.0463597	0.21699	0.00368	0.910718	4.60851	0.0781571	0.08321	0.00128	1266	19.54	1268.99	23.631	1274.2	29.74	99.3565	1274.2	29.74
185_134	140.639	32.5663	0.493313	2.74672	0.0530757	0.23156	0.00402	0.898424	4.31854	0.074972	0.08603	0.00146	1342.7	21.02	1341.2	25.9164	1338.8	32.54	100.291	1338.8	32.54
185_120	93.2157	21.3044	0.367365	2.71417	0.0544079	0.22855	0.00406	0.886175	4.37541	0.0777255	0.08613	0.0016	1326.9	21.34	1332.34	26.7079	1341.1	35.76	98.9412	1341.1	35.76
185_044	231.624	58.4643	0.385287	3.16144	0.0601676	0.25241	0.00438	0.91178	3.96181	0.0687481	0.09084	0.00142	1450.9	22.56	1447.8	27.554	1443.2	29.64	100.534	1443.2	29.64
185_087	55.7349	14.6588	0.750121	3.37652	0.0801615	0.26301	0.00528	0.845602	3.80214	0.076329	0.09311	0.00236	1505.2	26.9	1498.96	35.5866	1490.1	47.46	101.013	1490.1	47.46
185_082	448.582	116.685	0.381671	3.34444	0.0587001	0.26012	0.0043	0.941846	3.84438	0.0635508	0.09325	0.0011	1490.5	21.96	1491.49	26.178	1493	22.36	99.8326	1493	22.36
185_079	171.106	45.4253	0.337602	3.44411	0.0695443	0.26548	0.00478	0.891684	3.76676	0.067821	0.09409	0.00172	1517.8	24.38	1514.52	30.5817	1509.9	34.48	100.523	1509.9	34.48
185_021	130.014	31.0252	0.415407	3.13	0.0634833	0.23863	0.00432	0.892571	4.19059	0.0758636	0.09513	0.00174	1379.6	22.44	1440.09	29.2083	1530.6	34.16	90.1346	1530.6	34.16
185_093	231.503	61.9408	0.704637	3.50983	0.0642385	0.26756	0.00452	0.923012	3.73748	0.0631388	0.09514	0.00134	1528.4	23.04	1529.43	27.9923	1530.9	26.28	99.8367	1530.9	26.28
185_121	236.779	63.9682	0.62673	3.5782	0.0679034	0.27016	0.00466	0.908947	3.70151	0.0638475	0.09606	0.00152	1541.6	23.7	1544.71	29.3139	1549	29.66	99.5223	1549	29.66
185_126	160.213	43.4817	0.585616	3.60623	0.0716765	0.2714	0.00482	0.893539	3.6846	0.0654376	0.09637	0.00172	1547.9	24.46	1550.91	30.8254	1554.9	33.28	99.5498	1554.9	33.28
185_012	362.139	99.4651	0.507621	3.67227	0.0748669	0.27466	0.005	0.892932	3.64087	0.0662795	0.09697	0.00178	1564.4	25.34	1565.36	31.9132	1566.6	34.38	99.8596	1566.6	34.38
185_060	51.3097	13.8649	0.261842	3.61365	0.116951	0.27022	0.00694	0.793567	3.70069	0.095044	0.09699	0.00382	1541.9	35.2	1552.54	50.2459	1566.9	72.92	98.4045	1566.9	72.92
185_005	361.691	100.93	0.341747	3.73173	0.0648075	0.27905	0.0046	0.949206	3.58359	0.0590736	0.09699	0.00106	1586.6	23.22	1578.2	27.408	1567.1	20.4	101.244	1567.1	20.4
185_020	432.536	108.316	0.092196	3.38374	0.0590762	0.25042	0.00414	0.946925	3.99329	0.066018	0.098	0.0011	1440.7	21.36	1500.64	26.1994	1586.3	21.08	90.8214	1586.3	21.08
185_045	291.021	83.3803	0.486652	3.95751	0.0830584	0.28651	0.00532	0.884729	3.49028	0.0648085	0.10018	0.00196	1624.1	26.64	1625.53	34.1159	1627.5	35.98	99.7911	1627.5	35.98
185_035	126.51	35.6355	0.354188	3.89312	0.0860446	0.28168	0.00542	0.870598	3.55013	0.0683105	0.10024	0.00218	1599.8	27.28	1612.26	35.6336	1628.6	40.08	98.2316	1628.6	40.08
185_138	422.337	113.638	0.213293	3.74629	0.0671458	0.26907	0.00448	0.928957	3.7165	0.0618796	0.10098	0.00134	1536.1	22.72	1581.32	28.3424	1642.2	24.48	93.5392	1642.2	24.48
185_132	54.7906	15.8723	0.428756	4.05935	0.155205	0.28969	0.00862	0.778261	3.45197	0.102717	0.10163	0.00488	1640	43.12	1646.18	62.9398	1654	87.6	99.1536	1654	87.6
185_105	327.115	95.2723	0.778583	4.08161	0.0807378	0.29125	0.00518	0.899123	3.43348	0.0610658	0.10164	0.00176	1647.8	25.92	1650.64	32.651	1654.2	32.04	99.6131	1654.2	32.04
185_084	215.469	63.3221	0.580138	4.13306	0.0750009	0.29388	0.00496	0.930072	3.40275	0.0574304	0.102	0.00136	1660.9	24.68	1660.86	30.139	1660.9	24.52	100	1660.9	24.52
185_076	402.149	118.159	0.389082	4.1391	0.0721172	0.29382	0.00484	0.945433	3.40344	0.0560638	0.10217	0.00116	1660.6	24.1	1662.06	28.9587	1663.9	20.88	99.8017	1663.9	20.88
185_083	205.383	61.0707	0.53189	4.21466	0.079989	0.29735	0.00516	0.914353	3.36304	0.0583598	0.1028	0.00158	1678.2	25.68	1676.88	31.8251	1675.3	28.32	100.173	1675.3	28.32
185_086	342.954	101.614	1.3258	4.20658	0.0743021	0.29629	0.00492	0.940105	3.37507	0.0560443	0.10297	0.00124	1672.9	24.44	1675.3	29.5914	1678.4	22.32	99.6723	1678.4	22.32
185_122	227.559	68.1697	0.535744	4.2676	0.0769836	0.29957	0.00502	0.928947	3.33812	0.055938	0.10332	0.00138	1689.2	24.9	1687.14	30.4344	1684.6	24.7	100.273	1684.6	24.7
185_096	238.684	71.3164	0.591621	4.25649	0.0907492	0.29879	0.0056	0.879085	3.34683	0.0627272	0.10332	0.0021	1685.3	27.82	1684.99	35.9243	1684.7	37.22	100.036	1684.7	37.22
185_112	99.4888	29.969	0.838328	4.30496	0.082267	0.30123	0.00524	0.910282	3.31972	0.0577477	0.10365	0.00164	1697.4	25.98	1694.31	32.378	1690.5	29.12	100.408	1690.5	29.12
185_067	170.104	51.026	0.490322	4.32004	0.0805265	0.29997	0.00516	0.922827	3.33367	0.0573448	0.10445	0.0015	1691.2	25.58	1697.19	31.6361	1704.7	26.44	99.2081	1704.7	26.44
185_030	263.612	79.4554	0.16571	4.36114	0.0882089	0.30141	0.00548	0.898899	3.31774	0.0603205	0.10494	0.00186	1698.3	27.1	1705.01	34.4857	1713.3	32.26	99.1245	1713.3	32.26
185_128	52.26	16.128	0.637759	4.53212	0.0960638	0.30861	0.00576	0.88055	3.24034	0.0604787	0.10651	0.00214	1733.8	28.38	1736.89	36.8154	1740.4	36.76	99.6208	1740.4	36.76
185_058	89.1289	25.2021	0.725786	4.22268	0.101811	0.28276	0.00582	0.853685	3.53657	0.0727926	0.10831	0.00272	1605.3	29.22	1678.44	40.4681	1771.1	45.48	90.6386	1771.1	45.48
185_088	426.666	136.2	0.277415	4.8169	0.0867074	0.31922	0.00536	0.932795	3.13264	0.0525999	0.10944	0.00142	1785.9	26.24	1787.85	32.1825	1790	23.58	99.7709	1790	23.58
185_135	267.666	85.6666	0.287592	4.83339	0.0883465	0.32005	0.0054	0.923079	3.12451	0.0527179	0.10953	0.00154	1790	26.4	1790.73	32.7316	1791.6	25.56	99.9107	1791.6	25.56
185_137	63.0981	20.4608	0.315291	4.92797	0.132475	0.32427	0.00726	0.832848	3.08385	0.0690435	0.11022	0.00328	1810.5	35.38	1807.06	48.5777	1803	53.72	100.416	1803	53.72
185_080	315.775	101.935	0.301	4.90757	0.0860348	0.32281	0.00534	0.943597	3.0978	0.0512445	0.11026	0.00128	1803.4	25.98	1803.56	31.6183	1803.7	20.92	99.9834	1803.7	20.92
185_114	392.732	138.175	0.235991	5.75332	0.102023	0.35183	0.00584	0.936053	2.84228	0.0471788	0.1186	0.00148	1943.3	27.88	1939.42	34.3915	1935.3	22.16	100.413	1935.3	22.16
185_119	165.797	85.0042	0.480248	12.9054	0.233618	0.5127	0.00868	0.935233	1.95046	0.0330212	0.18256	0.00234	2668.2	37.02	2672.77	48.3835	2676.3	21.06	99.6973	2676.3	21.06
185_004	62.9793	33.6826	0.342716	13.5565	0.251479	0.53482	0.00934	0.941428	1.86979	0.0326536	0.18384	0.0023	2761.7	39.22	2719.24	50.4428	2687.9	20.64	102.746	2687.9	20.64
185_103	107.228	58.9808	0.399604	15.1485	0.2731	0.55005	0.00932	0.939854	1.81802	0.0308043	0.19974	0.00246	2825.4	38.76	2824.62	50.9229	2824.1	19.96	100.046	2824.1	19.96
7131/4-1 1100.1, Snadd Formation, Finnmark Platform
187_078	66.9019	4.78482	0.371642	1.37376	0.0603306	0.07152	0.00242	0.77048	13.9821	0.473108	0.13931	0.0078	445.3	14.62	877.774	38.5486	2218.6	95.5	20.0712
187_135	34.3647	2.17047	0.268275	1.04763	0.0381814	0.06316	0.00178	0.773277	15.8328	0.446206	0.1203	0.00556	394.8	10.78	727.709	26.5217	1960.6	81.48	20.1367
187_134	717.2	22.8858	0.653317	0.275952	0.00590897	0.03191	0.00058	0.848835	31.3381	0.569606	0.06272	0.00142	202.5	3.66	247.442	5.29847	698.7	47.94	28.9824
187_128	173.68	9.7417	0.375516	0.59503	0.0276541	0.05609	0.00182	0.698177	17.8285	0.578496	0.07694	0.00512	351.8	11.1	474.075	22.0327	1119.6	130.14	31.4219
187_117	638.659	25.5911	1.21212	0.353425	0.0119747	0.04007	0.00098	0.721836	24.9563	0.610362	0.06397	0.003	253.2	6.04	307.294	10.4117	740.6	97.9	34.1885
187_096	325.45	11.3875	1.27425	0.294338	0.00962032	0.03499	0.00082	0.717012	28.5796	0.66977	0.06101	0.00278	221.7	5.14	261.968	8.56233	639.4	96.54	34.6731
187_043	223.691	27.9815	0.309554	2.36427	0.0549601	0.12509	0.00252	0.86662	7.99424	0.161048	0.13708	0.00318	759.8	14.42	1231.88	28.6362	2190.6	39.96	34.6846
187_009	1947.13	58.4723	0.195126	0.2404	0.00507044	0.03003	0.00054	0.852562	33.3	0.598802	0.05806	0.00128	190.7	3.36	218.748	4.61377	531.4	48.76	35.8863
187_093	62.8137	4.9472	0.553084	0.871795	0.0284606	0.07876	0.00194	0.754514	12.6968	0.312745	0.08028	0.00344	488.7	11.54	636.541	20.7805	1203.9	83.28	40.5931
187_037	703.724	35.151	0.325528	0.446147	0.00966945	0.04995	0.00092	0.849823	20.02	0.368737	0.06478	0.00148	314.2	5.6	374.577	8.11831	767.1	47.46	40.9595
187_137	87.1391	4.2977	0.360424	0.420799	0.0178616	0.04932	0.00142	0.678297	20.2758	0.583771	0.06188	0.00386	310.3	8.74	356.622	15.1375	670	130.48	46.3134
187_094	127.505	7.46412	0.530038	0.505598	0.0157308	0.05854	0.00134	0.735712	17.0823	0.39102	0.06264	0.00264	366.8	8.18	415.485	12.9271	696	88.86	52.7011
187_069	452.212	31.5961	0.268827	0.627538	0.0131736	0.06987	0.00126	0.859044	14.3123	0.258101	0.06514	0.0014	435.4	7.62	494.561	10.3821	779	44.72	55.8922
187_082	703.425	31.8863	0.767197	0.358131	0.0101533	0.04533	0.00096	0.747002	22.0604	0.467197	0.0573	0.00216	285.8	5.96	310.818	8.81191	502.8	82.8	56.8417
187_059	681.736	32.0416	0.578865	0.372621	0.0106183	0.047	0.001	0.746642	21.2766	0.452694	0.0575	0.00218	296.1	6.18	321.594	9.16426	510.3	82.88	58.0247
187_139	53.8591	2.9434	0.530359	0.447738	0.021971	0.05465	0.00176	0.656291	18.2983	0.589294	0.05942	0.0044	343	10.8	375.694	18.4357	582.4	157	58.8942
187_047	320.669	11.8776	1.06808	0.278693	0.0124619	0.03704	0.00108	0.652071	26.9978	0.787194	0.05457	0.0037	234.5	6.74	249.62	11.1619	394.5	146.94	59.4423
187_077	381.638	67.3476	0.316036	2.49375	0.0504575	0.17647	0.0032	0.896203	5.66669	0.102756	0.10249	0.00184	1047.7	17.5	1270.22	25.7011	1669.6	33.02	62.7516
187_036	261.061	20.0103	1.03352	0.679026	0.0229204	0.07665	0.00188	0.726625	13.0463	0.319988	0.06425	0.00298	476.1	11.2	526.186	17.7613	749.9	96.58	63.4885
187_121	424.7	31.6699	0.732137	0.644869	0.0159149	0.07457	0.00148	0.8042	13.4102	0.266154	0.06272	0.00184	463.7	8.84	505.316	12.4709	698.8	61.84	66.3566
187_070	427.941	20.691	0.371176	0.371724	0.00870052	0.04835	0.00092	0.812955	20.6825	0.393545	0.05576	0.00152	304.4	5.62	320.93	7.51165	442.6	59.1	68.7754
187_110	58.4816	3.05566	0.199305	0.403797	0.0285996	0.05225	0.0023	0.621506	19.1388	0.842472	0.05605	0.00622	328.3	14.04	344.398	24.3926	454.1	238	72.2969
187_067	81.7994	7.6008	0.555539	0.838149	0.0217084	0.09292	0.0019	0.789474	10.7619	0.220057	0.06542	0.00208	572.8	11.22	618.123	16.0097	787.9	66.04	72.6996
187_008	97.8057	5.00276	0.459882	0.392687	0.018657	0.05115	0.00158	0.650153	19.5503	0.603901	0.05568	0.00402	321.6	9.72	336.33	15.9794	439.1	156.96	73.2407
187_004	224.418	16.2052	0.352345	0.589912	0.0177086	0.07221	0.0016	0.738115	13.8485	0.306849	0.05925	0.0024	449.5	9.64	470.811	14.1334	576.3	86.74	77.9976
187_068	70.4686	4.87502	0.344078	0.555811	0.0215232	0.06918	0.00184	0.686842	14.455	0.384465	0.05827	0.00328	431.2	11.1	448.796	17.3792	539.2	121.82	79.9703
187_023	67.8806	15.7958	0.454425	3.31306	0.0696241	0.2327	0.00434	0.88749	4.29738	0.0801488	0.10326	0.002	1348.7	22.66	1484.13	31.1891	1683.5	35.66	80.1129
187_074	113.688	6.18692	0.504482	0.415015	0.0122108	0.05442	0.00118	0.736957	18.3756	0.398442	0.05531	0.0022	341.6	7.22	352.48	10.3709	424.5	86.5	80.4711
187_085	35.751	6.05836	1.02638	1.89795	0.0524362	0.16946	0.00374	0.798836	5.9011	0.130238	0.08123	0.0027	1009.1	20.56	1080.37	29.8483	1226.9	64.72	82.2479
187_017	424.87	52.9813	0.238709	1.18344	0.0260524	0.1247	0.00232	0.845123	8.01925	0.149195	0.06883	0.00162	757.5	13.34	792.913	17.4553	893.8	48.04	84.7505
187_034	133.054	6.32275	0.783761	0.350994	0.0134822	0.04752	0.00124	0.679335	21.0438	0.549122	0.05357	0.00302	299.2	7.58	305.468	11.7335	352.7	124.98	84.8313
187_092	344.595	36.1136	0.510492	0.930713	0.0202015	0.1048	0.00194	0.852849	9.54198	0.176636	0.06441	0.00146	642.5	11.28	668.01	14.4994	755.1	47.54	85.0881
187_130	229.93	12.522	0.909119	0.410364	0.0148431	0.05446	0.00136	0.690408	18.3621	0.458547	0.05465	0.00286	341.9	8.36	349.137	12.6285	397.9	114.84	85.9261
187_030	312.283	15.7265	1.12707	0.373082	0.0107779	0.05036	0.00108	0.742347	19.857	0.425846	0.05373	0.00208	316.7	6.58	321.935	9.30035	359.7	86.54	88.0456
187_086	165.258	8.46616	0.578392	0.380516	0.0100493	0.05123	0.00104	0.76868	19.5198	0.396264	0.05387	0.00182	322.1	6.36	327.418	8.647	365.5	75.64	88.1259
187_029	200.84	11.6668	0.434894	0.44036	0.0186758	0.05809	0.00164	0.665688	17.2147	0.486005	0.05498	0.00348	364	10	370.506	15.7133	411.2	137.28	88.5214
187_104	353.707	13.8547	0.510343	0.277113	0.00655372	0.03917	0.00074	0.798816	25.5297	0.482308	0.05131	0.00146	247.7	4.62	248.365	5.87383	254.8	64.6	97.2135	247.7	4.62
187_098	696.497	27.6161	0.333305	0.282313	0.00872258	0.03965	0.00088	0.718332	25.2207	0.559753	0.05164	0.00222	250.7	5.44	252.491	7.80117	269.5	96.68	93.0241	250.7	5.44
187_066	254.013	10.9505	0.517282	0.311228	0.00934148	0.04311	0.00094	0.726462	23.1965	0.505792	0.05236	0.00216	272.1	5.8	275.133	8.25807	301.2	92.36	90.3386	272.1	5.8
187_131	264.082	11.4163	0.483842	0.308518	0.00929751	0.04323	0.00094	0.721534	23.1321	0.502988	0.05176	0.00216	272.8	5.86	273.032	8.22809	274.9	93.8	99.2361	272.8	5.86
187_021	286.641	12.8817	1.36281	0.323324	0.00811794	0.04494	0.00088	0.779906	22.2519	0.435729	0.05218	0.00164	283.4	5.42	284.457	7.14205	293.5	70.86	96.5588	283.4	5.42
187_031	401.223	18.2276	0.766694	0.325597	0.00801655	0.04543	0.00088	0.786742	22.0119	0.42638	0.05198	0.00158	286.4	5.42	286.199	7.04653	284.6	68.72	100.632	286.4	5.42
187_035	415.155	18.9145	0.47727	0.325021	0.00692508	0.04556	0.00082	0.844728	21.9491	0.395045	0.05174	0.00118	287.2	5.04	285.758	6.08851	274	51.96	104.818	287.2	5.04
187_053	949.441	43.323	0.233017	0.327659	0.00627589	0.04563	0.00078	0.892465	21.9154	0.374622	0.05208	0.0009	287.7	4.84	287.777	5.51201	288.9	39.28	99.5846	287.7	4.84
187_126	329.112	15.2346	0.808351	0.333292	0.0119465	0.04629	0.00114	0.687074	21.6029	0.532023	0.05222	0.00272	291.7	7.04	292.076	10.4691	295	116.94	98.8814	291.7	7.04
187_079	501.226	23.5827	0.897197	0.340451	0.0071829	0.04705	0.00084	0.846203	21.254	0.379455	0.05248	0.00118	296.4	5.2	297.514	6.27699	306.5	50.36	96.7047	296.4	5.2
187_016	254.842	12.3038	0.460184	0.348619	0.00843157	0.04828	0.00092	0.787886	20.7125	0.394687	0.05237	0.00156	304	5.7	303.682	7.34474	301.7	67.28	100.762	304	5.7
187_099	407.946	19.8303	0.612449	0.349326	0.00756704	0.04861	0.00088	0.835723	20.5719	0.372419	0.05212	0.00124	306	5.44	304.214	6.58983	290.7	53.56	105.263	306	5.44
187_048	105.124	5.18575	1.14859	0.358309	0.0106414	0.04933	0.00106	0.723525	20.2716	0.435596	0.05268	0.00216	310.4	6.56	310.952	9.23494	315	91.44	98.5397	310.4	6.56
187_122	408.904	20.2121	0.617519	0.356991	0.00775271	0.04943	0.0009	0.838409	20.2306	0.368351	0.05238	0.00124	311	5.56	309.966	6.73147	302	53.8	102.98	311	5.56
187_075	501.94	25.0719	0.332161	0.360678	0.00739765	0.04995	0.00088	0.85896	20.02	0.352705	0.05237	0.0011	314.2	5.44	312.721	6.41403	301.5	47.3	104.212	314.2	5.44
187_007	279.145	13.9768	0.368327	0.362373	0.00814688	0.05007	0.00092	0.817287	19.972	0.366972	0.05249	0.00136	315	5.66	313.985	7.05902	306.9	58.06	102.639	315	5.66
187_018	62.8618	3.16446	0.343705	0.368075	0.0186208	0.05034	0.00162	0.636121	19.8649	0.639276	0.05303	0.00414	316.6	9.94	318.226	16.0989	330.1	172.58	95.9103	316.6	9.94
187_133	374.634	18.9939	0.500653	0.366373	0.00821143	0.0507	0.00094	0.827227	19.7239	0.365689	0.05241	0.00132	318.8	5.78	316.962	7.10399	303.4	57.1	105.076	318.8	5.78
187_118	279.785	14.2942	0.38993	0.375602	0.0176793	0.05109	0.00156	0.64871	19.5733	0.597658	0.05332	0.00382	321.2	9.56	323.797	15.2409	342.6	157.94	93.7536	321.2	9.56
187_091	292.069	15.2665	0.573936	0.381322	0.00850671	0.05227	0.00096	0.823282	19.1314	0.351371	0.05291	0.00134	328.4	5.94	328.01	7.31741	324.7	57.3	101.14	328.4	5.94
187_013	42.8203	2.26733	0.369555	0.386063	0.031145	0.05295	0.00258	0.603982	18.8857	0.920212	0.05288	0.0068	332.6	15.76	331.49	26.7424	323.6	278.5	102.781	332.6	15.76
187_063	468.472	24.8946	1.35275	0.391039	0.00800539	0.05314	0.00094	0.86406	18.8182	0.332878	0.05337	0.0011	333.7	5.76	335.128	6.86077	344.4	46.04	96.8931	333.7	5.76
187_051	847.831	45.1555	0.558657	0.389646	0.00746604	0.05326	0.00092	0.901501	18.7758	0.324329	0.05306	0.00088	334.5	5.58	334.11	6.40193	331.2	37.28	100.996	334.5	5.58
187_022	302.962	16.2267	0.593476	0.39184	0.00891556	0.05356	0.001	0.820578	18.6706	0.348593	0.05306	0.00138	336.3	6.08	335.713	7.63849	331.2	58.06	101.54	336.3	6.08
187_032	145.871	7.87412	0.373374	0.399379	0.0141729	0.05398	0.00132	0.689074	18.5254	0.45301	0.05366	0.00276	338.9	8.12	341.197	12.1082	356.7	114.14	95.0098	338.9	8.12
187_138	61.9039	3.35705	0.390576	0.399583	0.0148097	0.05423	0.00138	0.686596	18.44	0.469245	0.05344	0.00288	340.5	8.38	341.346	12.6512	347.6	119.68	97.9574	340.5	8.38
187_025	484.464	26.3791	0.249979	0.404282	0.00969114	0.05445	0.00104	0.796793	18.3655	0.350782	0.05385	0.00156	341.8	6.38	344.749	8.26406	364.7	65.16	93.7209	341.8	6.38
187_061	399.73	21.8412	0.358947	0.402454	0.010165	0.05464	0.00108	0.782568	18.3016	0.361745	0.05342	0.00168	342.9	6.58	343.426	8.6741	346.6	70.14	98.9325	342.9	6.58
187_083	111.104	6.1107	0.656568	0.403209	0.018955	0.055	0.00168	0.64976	18.1818	0.555372	0.05317	0.0038	345.2	10.2	343.973	16.1703	336.1	157.86	102.708	345.2	10.2
187_012	50.9887	2.81101	0.260274	0.403554	0.0192375	0.05513	0.0017	0.646867	18.1389	0.559336	0.05309	0.00386	345.9	10.32	344.223	16.4091	332.6	160.98	103.999	345.9	10.32
187_010	226.518	12.5446	1.56002	0.406224	0.0220633	0.05538	0.0019	0.631678	18.0571	0.619509	0.0532	0.00448	347.4	11.66	346.152	18.8006	337.2	185	103.025	347.4	11.66
187_045	266.013	14.8967	0.611447	0.41278	0.0123167	0.056	0.00122	0.730123	17.8571	0.389031	0.05346	0.00218	351.3	7.46	350.875	10.4696	348.3	91.22	100.861	351.3	7.46
187_020	254.372	14.339	0.778339	0.412165	0.00926053	0.05637	0.00104	0.821146	17.7399	0.327293	0.05303	0.00136	353.5	6.34	350.433	7.87354	330.1	57.14	107.089	353.5	6.34
187_019	53.8142	3.03781	0.270683	0.412905	0.0285332	0.05645	0.0024	0.615243	17.7148	0.753153	0.05305	0.00578	354	14.58	350.965	24.253	331	237.38	106.949	354	14.58
187_049	93.8362	5.31301	0.215586	0.41571	0.0245673	0.05662	0.0021	0.627599	17.6616	0.655058	0.05325	0.0049	355.1	12.76	352.979	20.8601	339.5	201.24	104.595	355.1	12.76
187_065	269.345	15.2665	1.04172	0.420215	0.0113104	0.05668	0.00116	0.760361	17.6429	0.361076	0.05377	0.00188	355.4	7.1	356.204	9.58755	361.3	77.66	98.367	355.4	7.1
187_136	285.417	16.303	0.545458	0.426469	0.0108775	0.05712	0.00114	0.782484	17.507	0.349404	0.05415	0.00172	358.1	6.94	360.667	9.19914	377.2	70.86	94.9364	358.1	6.94
187_097	65.1097	3.75618	0.283581	0.430168	0.0251551	0.05769	0.00212	0.628417	17.334	0.636993	0.05408	0.00492	361.6	12.96	363.296	21.2446	374.4	197.56	96.5812	361.6	12.96
187_087	83.1039	4.79676	0.425242	0.427129	0.017523	0.05772	0.00158	0.667241	17.325	0.474247	0.05367	0.00328	361.7	9.64	361.136	14.8156	357.2	135.86	101.26	361.7	9.64
187_105	41.2575	2.38881	0.355019	0.432213	0.0219247	0.0579	0.00188	0.640094	17.2712	0.560791	0.05414	0.00422	362.8	11.5	364.747	18.5024	376.6	169.74	96.3356	362.8	11.5
187_028	108.228	6.26859	0.147319	0.43364	0.0229527	0.05792	0.00196	0.639328	17.2652	0.58425	0.0543	0.00442	363	11.92	365.758	19.3596	383.6	176.46	94.6298	363	11.92
187_071	129.542	7.5834	0.4449	0.433439	0.0120602	0.05854	0.00122	0.748997	17.0823	0.356004	0.0537	0.00198	366.8	7.48	365.616	10.1731	358.3	83.66	102.372	366.8	7.48
187_052	450.845	27.0597	0.584903	0.449777	0.00923842	0.06002	0.00106	0.859823	16.6611	0.294248	0.05435	0.00114	375.8	6.5	377.123	7.74611	385.4	46.92	97.5091	375.8	6.5
187_005	157.449	9.47055	0.715086	0.447267	0.0111522	0.06015	0.00118	0.786776	16.6251	0.326145	0.05393	0.00166	376.5	7.14	375.364	9.35939	367.9	69.24	102.338	376.5	7.14
187_080	106.906	6.43897	0.400822	0.450022	0.0126088	0.06023	0.00126	0.746651	16.603	0.347332	0.05419	0.00202	377	7.7	377.294	10.5711	378.9	82.42	99.4985	377	7.7
187_132	150.668	9.15612	0.65048	0.462268	0.0189504	0.06077	0.00168	0.674367	16.4555	0.454916	0.05517	0.00334	380.3	10.2	385.834	15.817	418.9	131.78	90.7854	380.3	10.2
187_060	409.336	25.0882	0.322955	0.46073	0.0117542	0.06129	0.00122	0.780235	16.3159	0.324774	0.05452	0.00174	383.5	7.38	384.766	9.81615	392.4	70	97.7319	383.5	7.38
187_129	889.082	56.6879	0.624615	0.479298	0.0092438	0.06376	0.0011	0.894539	15.6838	0.27058	0.05452	0.00094	398.5	6.72	397.591	7.66799	392.4	38.46	101.555	398.5	6.72
187_127	133.646	8.80597	0.444641	0.498126	0.0147777	0.06589	0.00144	0.736673	15.1768	0.331683	0.05483	0.0022	411.3	8.74	410.433	12.1762	405.3	88.08	101.48	411.3	8.74
187_044	318.458	26.1008	0.0978667	0.648657	0.0133405	0.08196	0.00146	0.86615	12.2011	0.217345	0.0574	0.00118	507.8	8.68	507.652	10.4406	506.6	45	100.237	507.8	8.68
187_024	206.958	17.9909	0.740361	0.707648	0.0158928	0.08693	0.00162	0.829781	11.5035	0.214376	0.05904	0.00148	537.4	9.62	543.349	12.2028	568.7	53.06	94.4962	537.4	9.62
187_103	305.375	26.9249	0.481173	0.715919	0.018425	0.08817	0.00178	0.784432	11.3417	0.22897	0.05889	0.00188	544.7	10.56	548.255	14.11	563.2	68.56	96.7152	544.7	10.56
187_081	262.552	23.5955	0.66237	0.732077	0.015396	0.08987	0.00162	0.857133	11.1272	0.200579	0.05908	0.00128	554.8	9.62	557.771	11.7303	569.9	47.36	97.3504	554.8	9.62
187_057	204.964	19.8098	1.18973	0.794902	0.0170777	0.09665	0.00176	0.84761	10.3466	0.188412	0.05965	0.00136	594.8	10.38	593.949	12.7604	590.8	49.02	100.677	594.8	10.38
187_095	53.243	13.0232	0.372077	3.21235	0.118989	0.2446	0.007	0.772603	4.08831	0.117	0.09525	0.00448	1410.6	36.3	1460.14	54.0854	1533.1	87.32	92.0097	1410.6	36.3
187_062	364.916	95.0131	0.281464	3.36381	0.0629163	0.26037	0.0045	0.924038	3.84069	0.066379	0.0937	0.00134	1491.7	23.02	1496.01	27.9812	1502.1	27.1	99.3076	1491.7	23.02
187_033	71.3062	18.6195	0.879813	3.37314	0.0697963	0.26112	0.0048	0.888389	3.82966	0.0703981	0.09369	0.00178	1495.6	24.52	1498.18	31	1501.9	35.52	99.5805	1495.6	24.52
187_006	146.654	47.9617	0.808281	5.0341	0.0953227	0.32704	0.00572	0.923678	3.05773	0.0534804	0.11164	0.00162	1824	27.78	1825.08	34.5586	1826.2	26.28	99.8795	1824	27.78
187_011	190.804	62.9483	0.288707	5.25659	0.103855	0.32991	0.00594	0.911313	3.03113	0.0545752	0.11556	0.00188	1838	28.84	1861.84	36.7846	1888.6	29.2	97.3208	1838	28.84
187_084	94.2004	32.1506	0.337886	5.41925	0.105611	0.3413	0.00608	0.914104	2.92997	0.0521953	0.11516	0.00182	1892.9	29.24	1887.9	36.7918	1882.3	28.26	100.563	1892.9	29.24
187_088	28.7458	10.9504	0.996644	6.7903	0.156209	0.38094	0.0077	0.878652	2.62509	0.0530613	0.12928	0.00284	2080.7	35.98	2084.46	47.9524	2088.3	38.32	99.6361	2080.7	35.98
187_125	45.2013	17.6602	1.21313	7.15551	0.155079	0.3907	0.00754	0.890464	2.55951	0.0493952	0.13283	0.00262	2126.1	34.92	2130.98	46.1839	2135.7	34.26	99.5505	2126.1	34.92
187_054	110.415	57.0681	0.637414	13.2528	0.242722	0.51685	0.00892	0.942323	1.9348	0.0333915	0.18597	0.00228	2685.8	37.94	2697.83	49.41	2706.8	20.24	99.2242	2685.8	37.94
187_046	208.877	112.911	0.333831	14.5264	0.260942	0.54056	0.0092	0.94745	1.84993	0.0314847	0.1949	0.00224	2785.8	38.48	2784.73	50.0231	2783.9	18.72	100.068	2785.8	38.48
7226/2-1 1380.5, Snadd Formation, Bjarmeland Platform
A_092	482.29	34.1413	0.732243	0.696316	0.0228446	0.07079	0.00216	0.930047	14.1263	0.431032	0.07134	0.00172	440.9	12.96	536.588	17.6043	967.2	48.68	45.5852
A_006	435.915	18.631	0.285393	0.347863	0.0115835	0.04274	0.0013	0.913432	23.3973	0.711663	0.05903	0.0016	269.8	7.98	303.113	10.0934	568.2	58.12	47.4833
A_086	247.671	14.5655	0.432647	0.523013	0.0228626	0.05881	0.00194	0.754636	17.0039	0.560918	0.0645	0.0037	368.4	11.84	427.162	18.6726	758.2	118.7	48.5888
A_102	1077.23	59.9911	0.26081	0.443896	0.0157137	0.05569	0.00172	0.872478	17.9565	0.554593	0.05781	0.002	349.3	10.56	372.996	13.2039	522.5	75.78	66.8517
A_063	987.101	155.676	0.281395	1.74221	0.0561073	0.15771	0.00476	0.937195	6.34075	0.191376	0.08012	0.0018	944	26.56	1024.28	32.9866	1200	43.86	78.6667
A_061	485.503	33.558	0.412917	0.55428	0.0238697	0.06912	0.00226	0.759253	14.4676	0.473043	0.05816	0.00326	430.9	13.6	447.797	19.2841	535.1	120.2	80.527
A_016	741.53	37.8255	0.277459	0.38268	0.0147958	0.05101	0.0016	0.81126	19.604	0.614907	0.05441	0.00246	320.7	9.82	329.008	12.7207	388.2	99.32	82.6121
A_022	859.591	232.433	0.206488	4.18163	0.132519	0.2704	0.0081	0.945248	3.69822	0.110783	0.11216	0.00232	1542.8	41.14	1670.43	52.9371	1834.6	37.3	84.0946
A_098	275.543	83.225	0.239501	5.06323	0.168425	0.30204	0.00928	0.923642	3.31082	0.101723	0.12158	0.0031	1701.4	45.98	1829.97	60.8728	1979.5	45.18	85.951
A_050	110.814	5.67587	0.380021	0.381642	0.0157632	0.05122	0.00164	0.775206	19.5236	0.625122	0.05404	0.00282	322	10.06	328.246	13.5577	372.7	115.42	86.3966
A_059	111.798	10.215	0.741106	0.767728	0.035596	0.09137	0.00308	0.727032	10.9445	0.36893	0.06094	0.00388	563.6	18.14	578.459	26.8204	637	134.18	88.4772
A_028	294.812	11.1174	0.272469	0.265588	0.00979722	0.03771	0.00116	0.833887	26.5182	0.815727	0.05108	0.00208	238.6	7.26	239.16	8.82233	244.3	92.86	97.6668	238.6	7.26
A_026	990.253	39.3922	0.278096	0.281264	0.00950216	0.03978	0.0012	0.892911	25.1383	0.758319	0.05128	0.00156	251.5	7.5	251.66	8.50202	253.5	69.02	99.211	251.5	7.5
A_117	1179.04	47.3975	0.553089	0.28379	0.0120183	0.0402	0.0013	0.763613	24.8756	0.804436	0.0512	0.0028	254.1	8.08	253.66	10.7423	249.9	123.54	101.681	254.1	8.08
A_125	234.573	9.82159	0.313401	0.297196	0.0149507	0.04187	0.00144	0.68366	23.8834	0.821404	0.05148	0.00378	264.4	8.88	264.208	13.2912	262.2	164.28	100.839	264.4	8.88
A_005	894.012	38.7376	0.162421	0.309889	0.0102695	0.04333	0.0013	0.905342	23.0787	0.692414	0.05187	0.00146	273.5	8.08	274.095	9.08329	279.7	63.86	97.7833	273.5	8.08
A_107	327.359	14.227	0.521271	0.313336	0.0109215	0.04346	0.00134	0.884591	23.0097	0.709456	0.05229	0.0017	274.2	8.28	276.763	9.64674	298.1	73.1	91.9826	274.2	8.28
A_089	1265.21	55.3276	0.328982	0.315403	0.0122347	0.04373	0.00138	0.813527	22.8676	0.721639	0.05231	0.00236	275.9	8.54	278.36	10.7978	299	101.06	92.2742	275.9	8.54
A_115	415.157	18.3998	0.451064	0.317092	0.0107297	0.04432	0.00136	0.906852	22.5632	0.692372	0.05189	0.00148	279.5	8.4	279.663	9.46319	280.6	64.92	99.608	279.5	8.4
A_077	154.447	6.94703	0.615865	0.322806	0.0134977	0.04498	0.00144	0.765643	22.2321	0.711744	0.05205	0.0028	283.7	8.94	284.059	11.8775	287.4	120.72	98.7126	283.7	8.94
A_014	80.0419	3.71314	0.25789	0.334524	0.033467	0.04639	0.00226	0.486961	21.5564	1.05017	0.0523	0.00914	292.3	13.98	293.014	29.3142	298.5	374.3	97.9229	292.3	13.98
A_066	381.518	17.8855	0.481564	0.341031	0.0157965	0.04688	0.00156	0.718404	21.3311	0.709822	0.05276	0.0034	295.4	9.58	297.953	13.8012	318.6	143.34	92.7181	295.4	9.58
A_065	338.827	15.8978	0.940071	0.33634	0.0114616	0.04692	0.00144	0.900616	21.3129	0.654104	0.05199	0.00154	295.6	8.82	294.395	10.0322	285.1	66.72	103.683	295.6	8.82
A_015	489.174	23.0303	0.089377	0.339305	0.0111712	0.04708	0.00142	0.916101	21.2404	0.640642	0.05227	0.00138	296.6	8.74	296.645	9.76665	297.4	59.96	99.731	296.6	8.74
A_060	117.622	5.5882	0.458924	0.342797	0.0132241	0.04751	0.0015	0.818422	21.0482	0.66454	0.05233	0.00232	299.2	9.18	299.289	11.5457	299.9	99.26	99.7666	299.2	9.18
A_023	166.048	7.91385	0.470904	0.346245	0.0156846	0.04766	0.00156	0.72257	20.982	0.686778	0.05269	0.0033	300.1	9.62	301.893	13.6755	315.6	139.22	95.0887	300.1	9.62
A_095	48.3552	2.30703	0.311094	0.344766	0.0186391	0.04771	0.00168	0.651329	20.96	0.738058	0.05241	0.0043	300.4	10.3	300.777	16.2609	303.5	181.82	98.9786	300.4	10.3
A_064	176.262	8.46588	0.2079	0.352046	0.0143175	0.04803	0.00154	0.78839	20.8203	0.667568	0.05316	0.00266	302.4	9.42	306.258	12.4553	335.8	111.84	90.0536	302.4	9.42
A_040	471.488	22.7116	0.386401	0.349087	0.011557	0.04817	0.00146	0.915515	20.7598	0.629216	0.05256	0.0014	303.3	8.98	304.034	10.0654	309.9	60.42	97.8703	303.3	8.98
A_126	86.7717	4.21277	0.126825	0.35251	0.0157558	0.04855	0.0016	0.737329	20.5973	0.6788	0.05266	0.00318	305.6	9.84	306.607	13.7041	314	133.96	97.3248	305.6	9.84
A_051	176.513	8.61382	0.613297	0.356882	0.0196829	0.0488	0.00172	0.639063	20.4918	0.722252	0.05304	0.0045	307.1	10.64	309.884	17.0909	330.3	186.84	92.9761	307.1	10.64
A_010	356.327	17.4885	0.227767	0.355952	0.0119913	0.04908	0.00148	0.89512	20.3749	0.614402	0.0526	0.00158	308.8	9.14	309.188	10.4159	311.7	67.74	99.0696	308.8	9.14
A_041	452.335	22.4675	1.78004	0.361258	0.0120294	0.04967	0.0015	0.906925	20.1329	0.607999	0.05275	0.00148	312.5	9.26	313.154	10.4276	318.2	62.9	98.2087	312.5	9.26
A_052	199.457	9.91502	0.325699	0.364222	0.0134949	0.04971	0.00154	0.836131	20.1167	0.623208	0.05314	0.00216	312.8	9.5	315.362	11.6846	334.8	90.3	93.4289	312.8	9.5
A_137	330.697	16.4455	0.359664	0.359089	0.0125548	0.04973	0.00154	0.885717	20.1086	0.622707	0.05237	0.0017	312.9	9.46	311.534	10.8921	301.7	73.38	103.712	312.9	9.46
A_108	98.9587	4.93705	0.231721	0.361827	0.0284507	0.04989	0.00212	0.540418	20.0441	0.851744	0.0526	0.00696	313.9	12.98	313.578	24.6569	311.5	287.08	100.77	313.9	12.98
A_099	103.947	5.20047	0.189744	0.361807	0.015271	0.05003	0.00162	0.767176	19.988	0.647223	0.05245	0.00284	314.7	9.92	313.563	13.2347	305	120.48	103.18	314.7	9.92
A_035	261.919	13.1431	0.193676	0.361716	0.0183234	0.05018	0.00172	0.676644	19.9283	0.683073	0.05228	0.0039	315.6	10.5	313.495	15.8807	297.8	165.28	105.977	315.6	10.5
A_090	155.16	7.8356	0.364361	0.366251	0.0151779	0.0505	0.00162	0.774086	19.802	0.635232	0.0526	0.00276	317.6	9.98	316.871	13.1316	311.7	117.32	101.893	317.6	9.98
A_042	694.01	35.0891	1.2571	0.367592	0.0119439	0.05056	0.00152	0.925241	19.7785	0.594606	0.05273	0.0013	318	9.38	317.867	10.3283	317.3	55.48	100.221	318	9.38
A_124	738.024	37.3735	1.19421	0.368872	0.012154	0.05064	0.00154	0.922958	19.7472	0.600528	0.05283	0.00134	318.4	9.5	318.817	10.5048	321.6	56.68	99.005	318.4	9.5
A_021	107.544	5.474	0.334004	0.37631	0.0152278	0.0509	0.00162	0.786514	19.6464	0.625287	0.05362	0.00268	320.1	9.9	324.32	13.1239	355.1	111.36	90.1436	320.1	9.9
A_093	115.555	5.94183	0.597767	0.375617	0.0158516	0.05142	0.00166	0.764978	19.4477	0.627833	0.05298	0.00288	323.2	10.2	323.808	13.6652	328	121.3	98.5366	323.2	10.2
A_009	137.134	7.1241	0.535945	0.380921	0.0138972	0.05195	0.0016	0.844195	19.2493	0.592856	0.05318	0.00208	326.5	9.82	327.716	11.9561	336.2	87.5	97.1148	326.5	9.82
A_080	264.911	13.8231	0.521166	0.381457	0.0130361	0.05218	0.0016	0.897252	19.1644	0.587641	0.05302	0.0016	327.9	9.78	328.109	11.213	329.7	67.7	99.454	327.9	9.78
A_094	565.528	29.5262	0.156784	0.380452	0.0127593	0.05221	0.0016	0.913776	19.1534	0.586966	0.05285	0.00144	328.1	9.76	327.371	10.9791	322.4	61	101.768	328.1	9.76
A_055	277.809	14.5211	0.712734	0.384277	0.0141884	0.05227	0.00162	0.839406	19.1314	0.592939	0.05332	0.00214	328.4	9.96	330.18	12.191	342.3	89.44	95.9392	328.4	9.96
A_025	64.0118	3.36766	0.305038	0.386994	0.0174164	0.05261	0.00172	0.72645	19.0078	0.621429	0.05335	0.0033	330.5	10.56	332.171	14.9491	343.6	137.02	96.1874	330.5	10.56
A_067	621.701	32.801	0.231031	0.384023	0.0126529	0.05276	0.0016	0.920411	18.9538	0.574792	0.05279	0.00136	331.5	9.8	329.994	10.8728	319.6	57.66	103.723	331.5	9.8
A_004	74.2241	3.92052	0.279995	0.385043	0.0219255	0.05282	0.00188	0.625055	18.9322	0.673847	0.05287	0.0047	331.8	11.54	330.742	18.8335	323.1	195.56	102.693	331.8	11.54
A_085	100.77	5.3277	0.453359	0.386938	0.0149706	0.05287	0.00166	0.811522	18.9143	0.593867	0.05308	0.0024	332.1	10.22	332.13	12.8501	332	100.9	100.03	332.1	10.22
A_033	197.855	10.4665	0.262195	0.388908	0.0144021	0.0529	0.00164	0.83716	18.9036	0.586047	0.05332	0.00216	332.3	10.06	333.572	12.3529	342.3	90.76	97.0786	332.3	10.06
A_084	140.842	7.47165	0.316783	0.388621	0.0139526	0.05305	0.00164	0.861053	18.8501	0.582738	0.05313	0.00194	333.2	10.06	333.362	11.9686	334.2	81.6	99.7008	333.2	10.06
A_111	242.198	12.8607	0.322021	0.388621	0.0168159	0.0531	0.00174	0.757288	18.8324	0.617107	0.05308	0.003	333.5	10.6	333.362	14.4248	332.2	125.38	100.391	333.5	10.6
A_043	32.1966	1.70996	0.550153	0.389647	0.023801	0.05311	0.00196	0.604164	18.8288	0.69487	0.05321	0.00518	333.6	11.98	334.111	20.4087	337.7	212.72	98.7859	333.6	11.98
A_027	306.447	16.401	0.499281	0.391179	0.0139614	0.05352	0.00164	0.858569	18.6846	0.572548	0.05301	0.00194	336.1	10.08	335.23	11.9645	329.3	82.18	102.065	336.1	10.08
A_116	216.78	11.6086	0.275467	0.393318	0.0161839	0.05355	0.00172	0.780603	18.6741	0.599804	0.05327	0.00274	336.3	10.56	336.79	13.8579	340.4	114.6	98.7955	336.3	10.56
A_131	104.351	5.59216	0.467701	0.392873	0.0149602	0.05359	0.0017	0.833064	18.6602	0.591945	0.05317	0.00224	336.5	10.34	336.466	12.8123	336.1	93.58	100.119	336.5	10.34
A_103	358.848	19.5751	0.330649	0.40164	0.0151683	0.05455	0.00172	0.834898	18.3318	0.578015	0.0534	0.00222	342.4	10.48	342.837	12.9476	345.8	92.34	99.0168	342.4	10.48
A_017	49.2206	2.70123	0.186501	0.403994	0.0335421	0.05488	0.00238	0.522334	18.2216	0.790221	0.05339	0.00756	344.4	14.6	344.541	28.6059	345.3	304.78	99.7394	344.4	14.6
A_011	384.778	21.2667	0.254859	0.408161	0.0134308	0.05527	0.00166	0.912745	18.093	0.543412	0.05356	0.00144	346.8	10.2	347.55	11.4363	352.3	60.06	98.4388	346.8	10.2
A_081	495.14	27.5446	1.16962	0.409055	0.0135746	0.05563	0.0017	0.920865	17.9759	0.549327	0.05333	0.00138	349	10.34	348.195	11.5549	342.7	57.94	101.838	349	10.34
A_136	119.407	6.6629	0.242858	0.412921	0.0196298	0.0558	0.00188	0.708719	17.9211	0.603795	0.05367	0.0036	350	11.52	350.977	16.6851	356.9	147.96	98.0667	350	11.52
A_044	231.569	12.9239	0.688917	0.412303	0.0141958	0.05581	0.0017	0.884692	17.9179	0.545789	0.05358	0.00172	350.1	10.42	350.532	12.069	353.2	71.42	99.1223	350.1	10.42
A_118	139.913	7.82953	0.559718	0.415108	0.015829	0.05596	0.00176	0.824791	17.8699	0.562027	0.0538	0.00232	351	10.8	352.547	13.4434	362.5	96.1	96.8276	351	10.8
A_114	1145.37	64.1177	1.19316	0.416955	0.0142215	0.05598	0.00172	0.900822	17.8635	0.548861	0.05402	0.0016	351.1	10.52	353.871	12.0698	371.9	66.66	94.4071	351.1	10.52
A_091	678.903	39.1252	0.619567	0.425351	0.0140088	0.05763	0.00176	0.927282	17.3521	0.529926	0.05353	0.00132	361.2	10.68	359.87	11.8522	351.2	54.94	102.847	361.2	10.68
A_038	269.497	15.5796	0.420697	0.426121	0.016384	0.05781	0.00182	0.818806	17.298	0.544585	0.05346	0.00236	362.3	11.04	360.419	13.8578	348.4	98.48	103.99	362.3	11.04
A_133	243.312	14.1827	0.319743	0.433598	0.0170985	0.05829	0.00186	0.809185	17.1556	0.547425	0.05395	0.0025	365.2	11.32	365.728	14.4221	368.8	102.76	99.0239	365.2	11.32
A_048	258.379	15.2056	0.646181	0.434517	0.0189512	0.05885	0.00192	0.748039	16.9924	0.554381	0.05355	0.0031	368.6	11.66	366.379	15.9794	352	128.32	104.716	368.6	11.66
A_119	225.46	13.2931	0.195839	0.439069	0.0157689	0.05896	0.00184	0.868943	16.9607	0.529301	0.05401	0.00192	369.3	11.16	369.596	13.2738	371.1	79.1	99.515	369.3	11.16
A_007	110.834	6.56362	0.65965	0.443373	0.0233066	0.05922	0.00206	0.661744	16.8862	0.587395	0.0543	0.00428	370.9	12.5	372.628	19.5878	383.5	171	96.7145	370.9	12.5
A_120	33.9977	2.02388	0.345562	0.444135	0.0329767	0.05953	0.00244	0.552029	16.7983	0.688522	0.05411	0.0067	372.8	14.88	373.164	27.7071	375.7	266.66	99.2281	372.8	14.88
A_100	1263.51	75.5324	0.177711	0.443033	0.0159354	0.05978	0.00186	0.865027	16.728	0.520476	0.05375	0.00194	374.3	11.3	372.389	13.3944	360.7	80.9	103.77	374.3	11.3
A_109	148.108	9.65812	0.25618	0.493704	0.0226794	0.06521	0.00218	0.727742	15.3351	0.512658	0.05491	0.00346	407.2	13.16	407.432	18.7163	408.6	136.66	99.6574	407.2	13.16
A_039	37.7678	2.49305	0.26682	0.498578	0.0301375	0.06601	0.00244	0.611513	15.1492	0.559977	0.05478	0.00524	412.1	14.74	410.739	24.8279	403.4	206.26	102.157	412.1	14.74
A_047	112.593	7.85564	0.312514	0.542273	0.0194941	0.06977	0.00216	0.861191	14.3328	0.443727	0.05637	0.00206	434.8	13	439.922	15.8147	466.3	80.86	93.2447	434.8	13
A_062	90.4941	6.39341	0.467381	0.541515	0.0248117	0.07065	0.00234	0.722866	14.1543	0.468804	0.05559	0.00352	440.1	14.14	439.423	20.1339	435.9	137.48	100.964	440.1	14.14
A_032	38.6443	2.75302	0.107205	0.55085	0.0282763	0.07124	0.00246	0.6727	14.0371	0.484716	0.05608	0.00426	443.6	14.78	445.553	22.8712	455.3	164.08	97.4303	443.6	14.78
A_018	200.883	15.5262	0.242073	0.604877	0.0224271	0.07729	0.0024	0.837493	12.9383	0.401758	0.05676	0.0023	479.9	14.38	480.324	17.8091	481.6	89.28	99.647	479.9	14.38
A_013	58.4783	4.60516	0.136554	0.620538	0.0499139	0.07875	0.00344	0.543069	12.6984	0.554699	0.05715	0.00772	488.7	20.5	490.184	39.4287	496.9	285.94	98.3498	488.7	20.5
A_012	119.172	9.62195	0.0892383	0.635996	0.0259535	0.08074	0.00258	0.783049	12.3854	0.395769	0.05713	0.0029	500.5	15.36	499.824	20.3967	495.9	110.76	100.928	500.5	15.36
A_045	352.092	28.6497	5.92456	0.652851	0.021456	0.08137	0.00246	0.919891	12.2895	0.371541	0.05819	0.0015	504.3	14.7	510.232	16.7688	536.3	57.24	94.0332	504.3	14.7
A_056	51.8349	4.22039	1.25018	0.651568	0.038942	0.08142	0.00302	0.620608	12.282	0.455559	0.05804	0.00544	504.6	18.06	509.443	30.4477	530.7	200.12	95.082	504.6	18.06
A_058	43.6634	3.56162	0.651041	0.656255	0.0454466	0.08157	0.00326	0.57711	12.2594	0.489956	0.05835	0.0066	505.5	19.48	512.321	35.4789	543	237.86	93.0939	505.5	19.48
A_079	207.295	16.9505	0.237393	0.646139	0.0217635	0.08177	0.0025	0.907702	12.2294	0.373897	0.05731	0.00162	506.7	14.88	506.1	17.0466	503.2	61.46	100.696	506.7	14.88
A_127	442.369	36.2212	0.37707	0.653104	0.0216641	0.08188	0.0025	0.920458	12.213	0.372893	0.05785	0.0015	507.3	14.94	510.387	16.93	523.7	56.66	96.8684	507.3	14.94
A_029	147.005	12.2573	0.561808	0.664379	0.027448	0.08338	0.00268	0.777998	11.9933	0.385488	0.05779	0.003	516.3	15.92	517.289	21.3711	521.5	112.56	99.0029	516.3	15.92
A_106	128.466	10.777	0.865276	0.666823	0.0320242	0.08389	0.00286	0.709886	11.9204	0.406392	0.05765	0.0039	519.3	17	518.779	24.9144	516.2	146.1	100.601	519.3	17
A_049	77.6458	6.70161	0.708809	0.68713	0.0315405	0.08631	0.00288	0.726945	11.5861	0.386607	0.05774	0.00364	533.7	17.06	531.075	24.3773	519.6	136.22	102.714	533.7	17.06
A_031	171.15	15.0612	0.61766	0.71563	0.0241113	0.088	0.00268	0.903901	11.3636	0.346074	0.05898	0.0017	543.7	15.86	548.084	18.4662	566.3	62.26	96.0092	543.7	15.86
A_123	117.387	11.2961	1.3314	0.799541	0.030873	0.09623	0.00306	0.823517	10.3918	0.330446	0.06026	0.00264	592.3	18.02	596.57	23.0356	612.9	93.6	96.6389	592.3	18.02
A_097	100.675	9.73125	0.317523	0.794718	0.0349829	0.09666	0.0032	0.752073	10.3455	0.342497	0.05963	0.00346	594.8	18.8	593.844	26.1406	590.3	123.52	100.762	594.8	18.8
A_069	94.4753	9.22079	0.671381	0.807425	0.0292509	0.0976	0.00304	0.85978	10.2459	0.319135	0.06	0.00222	600.3	17.82	601.009	21.7729	603.4	79.34	99.4862	600.3	17.82
A_008	88.127	8.90171	0.24553	0.840371	0.0389009	0.10101	0.00338	0.722876	9.90001	0.331274	0.06034	0.00386	620.3	19.76	619.35	28.6698	615.7	134.94	100.747	620.3	19.76
A_034	120.059	12.3444	0.468131	0.854295	0.0291046	0.10282	0.00314	0.896393	9.72573	0.297012	0.06026	0.00182	630.9	18.34	627.004	21.3611	613	64.8	102.92	630.9	18.34
A_101	90.1548	10.3137	0.458273	0.99089	0.0352282	0.1144	0.00356	0.875305	8.74126	0.272018	0.06282	0.00216	698.3	20.56	699.174	24.8571	702.2	72.24	99.4446	698.3	20.56
A_083	129.191	14.8221	0.255077	0.995963	0.0340524	0.11473	0.00352	0.897349	8.71612	0.267417	0.06296	0.0019	700.2	20.38	701.758	23.9934	706.8	63.62	99.0662	700.2	20.38
A_030	292.6	48.2204	0.366206	1.63148	0.0525192	0.1648	0.00496	0.934951	6.06796	0.182628	0.0718	0.00164	983.4	27.46	982.432	31.6255	980.2	45.94	100.326	983.4	27.46
A_024	157.111	26.9053	0.325371	1.74351	0.0568584	0.17125	0.00518	0.92753	5.83942	0.176632	0.07384	0.0018	1019	28.46	1024.76	33.4191	1037.2	49	98.2453	1019	28.46
A_078	63.1574	12.8506	0.254333	2.24576	0.0757016	0.20347	0.00624	0.909792	4.91473	0.150724	0.08005	0.00224	1193.9	33.44	1195.46	40.2974	1198.2	54.6	99.6411	1193.9	33.44
A_130	65.9746	13.4931	0.164047	2.29231	0.0852969	0.20452	0.00652	0.856747	4.8895	0.155875	0.08129	0.00312	1199.6	34.86	1209.92	45.0211	1228.4	74.44	97.6555	1199.6	34.86
A_057	401.491	82.968	0.194147	2.32303	0.0752955	0.20665	0.00626	0.934597	4.8391	0.14659	0.08153	0.00188	1211	33.42	1219.35	39.5224	1234.2	44.82	98.1202	1211	33.42
A_128	67.9571	17.8102	0.29624	3.39096	0.113459	0.26208	0.00808	0.921425	3.81563	0.117637	0.09384	0.00244	1500.5	41.24	1502.31	50.2663	1504.9	48.86	99.7076	1504.9	48.86
A_132	299.074	79.5448	0.606433	3.49374	0.113779	0.26597	0.00812	0.93746	3.75982	0.114786	0.09527	0.00216	1520.3	41.36	1525.8	49.6899	1533.5	42.34	99.1392	1533.5	42.34
A_096	60.7166	20.2824	0.733363	5.29446	0.177445	0.33405	0.0103	0.919989	2.99356	0.0923027	0.11495	0.00302	1858	49.74	1867.97	62.6056	1879.1	47.04	98.8771	1879.1	47.04
A_135	295.335	148.072	0.276345	12.2566	0.398271	0.50137	0.01532	0.940352	1.99453	0.0609456	0.1773	0.00392	2619.7	65.76	2624.25	85.2737	2627.8	36.52	99.6918	2627.8	36.52
A_134	183.989	94.1877	0.308641	12.9111	0.419434	0.51192	0.01564	0.94045	1.95343	0.0596805	0.18292	0.00404	2664.8	66.7	2673.19	86.8417	2679.5	36.36	99.4514	2679.5	36.36
7226/6-1S 1638, Snadd Formation, Loppa High
A_123	82.7827	1746.1	0.104467	0.443986	0.0142273	0.04741	0.00136	0.895193	21.0926	0.605061	0.06792	0.00194	298.6	8.32	373.059	11.9545	866	58.54	34.4804
A_069	316.714	1797.16	0.0566538	2.98678	0.0887648	0.17623	0.0049	0.935576	5.6744	0.157774	0.12292	0.00258	1046.4	26.86	1404.26	41.7335	1999	37.02	52.3462
A_056	35.7491	636.784	0.327198	0.456075	0.0157171	0.05614	0.00162	0.837349	17.8126	0.514008	0.05892	0.00222	352.1	9.84	381.525	13.148	564.3	80.92	62.3959
A_135	7.48797	66.8808	0.378048	1.12011	0.0452713	0.11196	0.00346	0.76463	8.93176	0.276026	0.07256	0.00378	684.1	20.08	763.029	30.8392	1001.8	103.52	68.2871
A_041	37.2718	758.946	75.284	0.377025	0.011899	0.04911	0.00138	0.890364	20.3625	0.572189	0.05568	0.0016	309.1	8.46	324.847	10.2523	439.3	62.66	70.3619
A_110	31.574	716.938	0.319135	0.330512	0.0131333	0.04404	0.00132	0.75429	22.7066	0.68058	0.05443	0.00284	277.8	8.18	289.956	11.5218	388.8	114.44	71.4506
A_065	37.1314	857.934	0.324205	0.321944	0.0101721	0.04328	0.00122	0.89216	23.1054	0.651306	0.05395	0.00154	273.1	7.52	283.397	8.95416	368.8	62.6	74.051
A_090	10.7338	79.8821	0.330008	1.37025	0.0509167	0.13437	0.00402	0.805126	7.44214	0.222649	0.07396	0.00326	812.8	22.8	876.272	32.5611	1040.3	87.66	78.1313
A_044	51.2949	173.587	0.243879	5.17973	0.154341	0.2955	0.0082	0.931283	3.38409	0.0939072	0.12713	0.00276	1669	40.82	1849.29	55.1036	2058.7	38.04	81.0706
A_127	35.4247	432.642	0.349113	0.680538	0.0217375	0.08188	0.00234	0.894708	12.213	0.349028	0.06028	0.00172	507.3	13.9	527.1	16.8364	613.8	61.18	82.6491
A_132	47.0092	176.726	0.358806	4.06224	0.123929	0.266	0.00752	0.926681	3.7594	0.106281	0.11076	0.00254	1520.5	38.3	1646.76	50.2384	1812	41.22	83.9128
A_130	53.9432	189.601	0.216554	4.58068	0.139419	0.28451	0.00804	0.92847	3.51481	0.0993255	0.11677	0.00264	1614	40.34	1745.76	53.1343	1907.4	40.38	84.6178
A_058	7.39157	201.241	0.521249	0.261471	0.00970659	0.03673	0.00108	0.792064	27.2257	0.800538	0.05163	0.00234	232.5	6.66	235.852	8.75552	268.9	102.02	86.4634
A_059	47.0658	194.519	0.2782	3.29544	0.0988609	0.24196	0.00674	0.928551	4.13291	0.115126	0.09878	0.0022	1396.9	34.96	1479.98	44.3982	1601.2	41.08	87.2408
A_029	24.2791	484.612	0.372543	0.371363	0.0129832	0.0501	0.00144	0.82213	19.9601	0.573703	0.05376	0.00214	315.1	8.82	320.663	11.2107	360.8	88.92	87.3337
A_028	7.86754	213.502	0.551211	0.258007	0.00944571	0.03685	0.00106	0.785715	27.137	0.780604	0.05078	0.0023	233.3	6.64	233.06	8.53238	230.6	102.54	101.171	233.3	6.64
A_046	52.7765	1347.71	0.0960121	0.276502	0.0100034	0.03916	0.00114	0.804663	25.5363	0.743395	0.05121	0.0022	247.6	7.02	247.879	8.96784	250.5	97.5	98.8423	247.6	7.02
A_112	6.72675	164.669	0.378867	0.290744	0.00998856	0.04085	0.00118	0.840811	24.4798	0.707128	0.05162	0.00192	258.1	7.3	259.145	8.90297	268.8	84.6	96.0193	258.1	7.3
A_043	25.2568	601.639	0.198397	0.29844	0.00934129	0.04198	0.00118	0.898026	23.8209	0.669572	0.05156	0.00142	265.1	7.26	265.181	8.30028	265.8	62.46	99.7366	265.1	7.26
A_094	7.51418	170.738	1.26695	0.314995	0.0167628	0.04401	0.00146	0.623387	22.7221	0.75379	0.05191	0.00432	277.6	9.06	278.045	14.7965	281.4	185.16	98.6496	277.6	9.06
A_061	36.7323	824.703	0.192884	0.321245	0.0130175	0.04454	0.00134	0.742446	22.4517	0.675467	0.05231	0.00284	280.9	8.24	282.86	11.462	299.1	121.14	93.9151	280.9	8.24
A_077	16.3195	346.412	0.499758	0.342639	0.0117628	0.04711	0.00136	0.840916	21.2269	0.612791	0.05275	0.00196	296.8	8.32	299.17	10.2705	318.1	83.48	93.304	296.8	8.32
A_082	12.141	252.412	0.358359	0.349641	0.0113802	0.0481	0.00136	0.868691	20.79	0.587826	0.05272	0.0017	302.8	8.4	304.451	9.90935	316.7	72.04	95.611	302.8	8.4
A_115	13.1874	272.073	0.354176	0.350058	0.0112167	0.04847	0.00138	0.888551	20.6313	0.587399	0.05238	0.00154	305.1	8.46	304.765	9.76536	302.1	65.94	100.993	305.1	8.46
A_099	8.81219	181.023	0.212906	0.354259	0.0121271	0.04868	0.0014	0.84012	20.5423	0.590782	0.05278	0.00196	306.4	8.62	307.92	10.5408	319.4	82.92	95.9299	306.4	8.62
A_027	4.07077	83.5886	0.236658	0.352256	0.0190667	0.0487	0.00162	0.614567	20.5339	0.683057	0.05246	0.00448	306.6	9.96	306.417	16.5855	305.3	189.54	100.426	306.6	9.96
A_033	59.6154	1206.54	0.112556	0.359231	0.011168	0.04941	0.00138	0.898384	20.2388	0.565261	0.05273	0.00144	310.9	8.46	311.641	9.68849	317	61.68	98.0757	310.9	8.46
A_113	14.383	291.154	0.691518	0.35875	0.01144	0.0494	0.0014	0.88872	20.2429	0.573686	0.05267	0.00154	310.9	8.62	311.281	9.92632	314.4	65.38	98.8868	310.9	8.62
A_055	12.7707	256.801	0.344491	0.362586	0.0115238	0.04973	0.0014	0.885779	20.1086	0.566097	0.05288	0.00156	312.9	8.58	314.144	9.98419	323.5	66.46	96.7233	312.9	8.58
A_030	23.6529	475.244	0.42713	0.360064	0.0109915	0.04977	0.00138	0.90831	20.0924	0.557114	0.05247	0.00134	313.1	8.5	312.263	9.5323	305.8	57.94	102.387	313.1	8.5
A_109	10.7032	214.494	0.354017	0.367885	0.0126508	0.0499	0.00144	0.83918	20.0401	0.578311	0.05347	0.002	313.9	8.86	318.085	10.9383	348.6	83.62	90.0459	313.9	8.86
A_026	5.05055	100.649	0.367879	0.366905	0.016888	0.05018	0.00156	0.675413	19.9283	0.619531	0.05303	0.0036	315.6	9.62	317.357	14.6074	330	150.42	95.6364	315.6	9.62
A_103	27.247	539.438	0.232817	0.37092	0.0114527	0.05051	0.00142	0.910503	19.7981	0.556588	0.05326	0.00136	317.6	8.74	320.335	9.89085	339.9	57.18	93.4392	317.6	8.74
A_013	25.4944	499.205	0.308323	0.37306	0.0116399	0.05107	0.00142	0.89115	19.581	0.544448	0.05298	0.0015	321.1	8.72	321.919	10.0443	328.1	63.18	97.8665	321.1	8.72
A_124	25.5643	497.844	0.122416	0.376876	0.0140657	0.05135	0.00152	0.79312	19.4742	0.576451	0.05323	0.00242	322.8	9.3	324.737	12.1198	338.6	101.06	95.3337	322.8	9.3
A_032	5.63855	109.721	0.193355	0.375469	0.0140023	0.05139	0.0015	0.782683	19.459	0.567981	0.05299	0.00246	323	9.18	323.699	12.0717	328.3	103.74	98.3856	323	9.18
A_101	12.0485	234.087	0.369513	0.377331	0.0121159	0.05147	0.00146	0.883417	19.4288	0.551118	0.05317	0.0016	323.5	8.96	325.072	10.4379	335.9	66.96	96.3084	323.5	8.96
A_011	16.8578	327.273	0.439146	0.379186	0.012578	0.05151	0.00146	0.854482	19.4137	0.550262	0.05339	0.00184	323.8	8.9	326.439	10.8283	345.3	76.58	93.7735	323.8	8.9
A_025	19.8717	384.292	0.357075	0.378591	0.0116342	0.05171	0.00144	0.906198	19.3386	0.538534	0.0531	0.00138	325	8.8	326.001	10.0181	333.1	58.5	97.5683	325	8.8
A_023	2.30478	44.0515	0.295386	0.383634	0.0286212	0.05232	0.00206	0.527752	19.1131	0.752544	0.05318	0.00674	328.7	12.62	329.709	24.598	336.3	273.56	97.7401	328.7	12.62
A_080	56.0726	1069.48	0.229961	0.3882	0.0121942	0.05243	0.00148	0.898637	19.073	0.538396	0.0537	0.00148	329.4	9.04	333.054	10.4619	358.4	61.76	91.9085	329.4	9.04
A_125	7.30938	137.575	0.276092	0.390013	0.0137147	0.05313	0.00154	0.824277	18.8218	0.545558	0.05324	0.00212	333.7	9.48	334.379	11.7584	338.8	89.02	98.4947	333.7	9.48
A_095	32.7844	613.824	0.286482	0.393026	0.0127463	0.05341	0.00152	0.877524	18.7231	0.532842	0.05337	0.00166	335.4	9.28	336.577	10.9156	344.6	69.06	97.3302	335.4	9.28
A_045	15.1075	282.172	0.236542	0.391915	0.0165301	0.05354	0.00162	0.717388	18.6776	0.565143	0.05309	0.00312	336.2	9.94	335.768	14.1619	332.7	130.34	101.052	336.2	9.94
A_134	22.3717	413.754	0.171478	0.400865	0.0138007	0.05407	0.00156	0.838042	18.4945	0.533595	0.05377	0.00202	339.4	9.6	342.275	11.7836	361.3	83.78	93.9386	339.4	9.6
A_017	3.42908	63.2206	0.334873	0.401826	0.0163769	0.05424	0.00162	0.732826	18.4366	0.55065	0.05373	0.00298	340.5	9.9	342.972	13.9782	359.5	123	94.7149	340.5	9.9
A_084	1.77284	32.5711	0.406415	0.402858	0.028211	0.05443	0.00208	0.545706	18.3722	0.70208	0.05368	0.0063	341.7	12.68	343.719	24.0696	357.4	253.14	95.6072	341.7	12.68
A_060	11.2636	206.823	0.221119	0.40293	0.0132092	0.05446	0.00154	0.862573	18.3621	0.519237	0.05366	0.00178	341.8	9.44	343.771	11.2698	356.7	74.38	95.8228	341.8	9.44
A_102	28.1456	516.148	0.326592	0.405478	0.0136227	0.05453	0.00156	0.85152	18.3385	0.524631	0.05393	0.0019	342.3	9.56	345.613	11.6114	368.2	78.38	92.9658	342.3	9.56
A_048	5.43461	99.444	0.536713	0.406596	0.0163785	0.05465	0.00164	0.744976	18.2983	0.549115	0.05396	0.0029	343	9.98	346.421	13.9545	369.2	118.44	92.9036	343	9.98
A_014	4.34543	78.6788	0.167537	0.403753	0.0185448	0.05523	0.00172	0.678029	18.1061	0.563869	0.05302	0.00358	346.6	10.5	344.367	15.8171	329.6	149.9	105.158	346.6	10.5
A_131	27.457	494.187	0.429688	0.410226	0.0131777	0.05556	0.00158	0.885276	17.9986	0.511838	0.05355	0.0016	348.6	9.68	349.038	11.2121	351.9	66.62	99.0622	348.6	9.68
A_034	7.91539	142.056	0.211052	0.410562	0.0155797	0.05572	0.00164	0.775625	17.9469	0.528228	0.05344	0.00256	349.5	9.98	349.28	13.2542	347.4	107.06	100.604	349.5	9.98
A_012	12.8799	228.367	0.368788	0.416506	0.0139766	0.0564	0.0016	0.845399	17.7305	0.502993	0.05356	0.00192	353.7	9.74	353.549	11.8639	352.7	80.34	100.284	353.7	9.74
A_010	7.29758	128.343	0.333492	0.419354	0.0142475	0.05686	0.00162	0.838592	17.5871	0.501073	0.05349	0.00198	356.5	9.84	355.589	12.0811	349.7	83.04	101.945	356.5	9.84
A_126	9.89199	172.725	0.462776	0.422615	0.0138006	0.05727	0.00164	0.876925	17.4611	0.500022	0.05352	0.00168	359	9.98	357.919	11.688	350.8	70.4	102.338	359	9.98
A_068	3.76323	65.5387	0.35036	0.423959	0.0206839	0.05742	0.00184	0.65682	17.4155	0.558074	0.05355	0.00394	359.9	11.24	358.878	17.5087	352	161.58	102.244	359.9	11.24
A_015	27.0456	465.261	0.385699	0.429522	0.0136558	0.05813	0.00162	0.876566	17.2028	0.479418	0.05359	0.00164	364.2	9.9	362.837	11.5356	353.9	68.6	102.91	364.2	9.9
A_098	3.34253	57.3529	0.337038	0.431514	0.0338818	0.05828	0.0024	0.524469	17.1585	0.706598	0.0537	0.00718	365.1	14.6	364.251	28.6004	358.5	287.74	101.841	365.1	14.6
A_100	33.8359	577.404	0.109591	0.439216	0.0137692	0.0586	0.00166	0.903607	17.0648	0.483407	0.05436	0.00146	367.1	10.08	369.7	11.5899	385.9	59.9	95.1283	367.1	10.08
A_129	24.0959	410.353	0.398542	0.436634	0.0135824	0.05872	0.00166	0.908787	17.03	0.481433	0.05393	0.0014	367.8	10.14	367.876	11.4436	367.9	58.48	99.9728	367.8	10.14
A_051	19.8345	337.608	0.314159	0.435885	0.0134241	0.05875	0.00164	0.90641	17.0213	0.475147	0.05381	0.0014	368	10	367.347	11.3133	363.2	58.62	101.322	368	10
A_005	48.3554	818.889	0.586633	0.438925	0.0156788	0.05905	0.0017	0.805947	16.9348	0.487539	0.05391	0.00228	369.8	10.34	369.494	13.1987	367.2	94.36	100.708	369.8	10.34
A_007	42.8213	723.333	0.316715	0.443142	0.0135065	0.0592	0.00164	0.90891	16.8919	0.467951	0.05429	0.00138	370.8	9.98	372.465	11.3524	383	57.04	96.8146	370.8	9.98
A_091	4.1324	68.5989	0.175371	0.450096	0.018165	0.06024	0.00182	0.748612	16.6003	0.501535	0.05419	0.0029	377.1	11.04	377.347	15.229	378.7	118.24	99.5775	377.1	11.04
A_021	18.716	310.329	0.525645	0.449871	0.0139609	0.06031	0.00168	0.897622	16.581	0.461882	0.0541	0.00148	377.5	10.2	377.189	11.7054	374.9	61.26	100.694	377.5	10.2
A_117	23.6018	390.694	0.373169	0.45095	0.0151661	0.06041	0.00174	0.856435	16.5536	0.476795	0.05414	0.00188	378.1	10.56	377.944	12.7108	376.8	77.38	100.345	378.1	10.56
A_079	33.0006	457.96	0.660233	0.550831	0.0168148	0.07206	0.00202	0.918297	13.8773	0.389012	0.05544	0.00134	448.5	12.12	445.541	13.6007	429.8	53.56	104.351	448.5	12.12
A_128	19.0228	243.694	0.296637	0.611549	0.0194549	0.07806	0.00222	0.893978	12.8107	0.364331	0.05682	0.00162	484.6	13.3	484.536	15.4143	483.7	63.16	100.186	484.6	13.3
A_039	22.5428	286.768	0.220572	0.6164	0.018791	0.07861	0.00218	0.909685	12.721	0.352778	0.05687	0.00144	487.8	13.08	487.588	14.8642	485.9	55.92	100.391	487.8	13.08
A_114	14.2426	171.103	0.507411	0.663034	0.0229798	0.08324	0.00242	0.838829	12.0135	0.349262	0.05777	0.00218	515.4	14.38	516.468	17.9	521	82.2	98.9251	515.4	14.38
A_107	1.24598	14.8402	0.311918	0.664949	0.0512666	0.08396	0.00342	0.528332	11.9104	0.485156	0.05744	0.00752	519.7	20.38	517.637	39.909	507.9	276.14	102.323	519.7	20.38
A_024	21.9511	260.888	0.235339	0.669391	0.0205004	0.08414	0.00234	0.908093	11.885	0.33053	0.0577	0.00148	520.8	13.9	520.342	15.9357	518	56.56	100.541	520.8	13.9
A_009	39.1491	463.797	0.460339	0.670142	0.0200014	0.08441	0.00232	0.920874	11.8469	0.325612	0.05758	0.00134	522.4	13.84	520.799	15.544	513.3	50.04	101.773	522.4	13.84
A_008	13.9679	164.716	0.700107	0.671017	0.0238672	0.0848	0.00244	0.808959	11.7925	0.339311	0.05739	0.0024	524.7	14.5	521.33	18.543	506.3	91.28	103.634	524.7	14.5
A_116	17.6181	206.471	0.389324	0.687329	0.0215955	0.08533	0.00242	0.902641	11.7192	0.332362	0.05842	0.00158	527.9	14.36	531.194	16.6898	545.4	58.22	96.7913	527.9	14.36
A_119	4.54474	53.242	0.444911	0.683569	0.0363862	0.08536	0.0029	0.638247	11.7151	0.398006	0.05808	0.00476	528	17.18	528.929	28.1548	532.4	175.24	99.1736	528	17.18
A_096	8.37486	97.2464	0.193755	0.696067	0.0268918	0.08612	0.00258	0.775437	11.6117	0.347866	0.05862	0.00286	532.6	15.28	536.439	20.7248	553.2	104.68	96.2762	532.6	15.28
A_042	24.8914	286.734	0.298084	0.700088	0.0225493	0.08681	0.00244	0.872651	11.5194	0.32378	0.05849	0.00184	536.7	14.52	538.844	17.3557	548.2	67.68	97.9022	536.7	14.52
A_111	15.1056	171.052	0.445283	0.711333	0.0231258	0.08831	0.00252	0.877742	11.3237	0.323133	0.05842	0.00182	545.5	14.94	545.537	17.7357	545.7	67.14	99.9633	545.5	14.94
A_108	36.45	387.56	0.291271	0.771054	0.0239311	0.09405	0.00266	0.911264	10.6326	0.300721	0.05946	0.00152	579.5	15.64	580.368	18.0128	584	55.12	99.2295	579.5	15.64
A_049	17.5265	178.787	0.485829	0.812469	0.0252694	0.09803	0.00274	0.898677	10.201	0.285123	0.06011	0.00164	602.9	16.12	603.838	18.7806	607.4	58.76	99.2591	602.9	16.12
A_062	47.0541	477.804	0.661394	0.818507	0.0258889	0.09848	0.00278	0.892494	10.1543	0.286648	0.06028	0.00172	605.5	16.26	607.215	19.2059	613.6	60.72	98.6799	605.5	16.26
A_083	14.5298	145.969	0.414067	0.828415	0.0265855	0.09954	0.00282	0.882783	10.0462	0.284612	0.06036	0.00182	611.7	16.56	612.733	19.6638	616.6	64.54	99.2053	611.7	16.56
A_066	25.8175	209.32	0.392362	1.09315	0.0333173	0.12334	0.00344	0.915095	8.10767	0.226126	0.06428	0.00158	749.8	19.8	750.035	22.8597	750.7	51.42	99.8801	749.8	19.8
A_093	16.5271	131.439	0.293055	1.12171	0.0349226	0.12574	0.00354	0.90428	7.95292	0.223901	0.0647	0.00172	763.5	20.32	763.792	23.7795	764.8	55.4	99.83	763.5	20.32
A_120	11.4451	84.9483	0.499273	1.22977	0.0407951	0.13473	0.00388	0.868125	7.42225	0.213749	0.0662	0.00218	814.8	22.06	814.234	27.0106	812.6	68.1	100.271	814.8	22.06
A_040	33.0403	227.566	0.507371	1.36648	0.0414154	0.14519	0.00404	0.918095	6.88753	0.19165	0.06826	0.00164	874	22.74	874.656	26.5091	876.4	49.38	99.7262	874	22.74
A_067	3.27828	20.8356	0.680205	1.54331	0.0878337	0.15734	0.00568	0.634311	6.35566	0.22944	0.07114	0.00626	942	31.7	947.828	53.9432	961.5	174.5	97.9719	942	31.7
A_022	48.9605	301.351	0.615902	1.60035	0.0478958	0.16247	0.0045	0.92546	6.15498	0.170477	0.07144	0.00162	970.5	24.9	970.348	29.0408	970.1	45.66	100.041	970.5	24.9
A_097	87.0992	526.661	0.293192	1.64475	0.0496209	0.16538	0.00464	0.929973	6.04668	0.169649	0.07213	0.0016	986.6	25.62	987.538	29.7933	989.6	44.72	99.6968	986.6	25.62
A_089	26.1753	152.332	0.727376	1.72785	0.0527619	0.17183	0.00482	0.918616	5.81971	0.163248	0.07293	0.00176	1022.2	26.56	1018.95	31.1148	1011.9	48.78	101.018	1022.2	26.56
A_006	6.54127	37.7062	0.256091	1.77961	0.0581804	0.17348	0.00492	0.867486	5.76435	0.163481	0.0744	0.00242	1031.3	26.98	1038.04	33.9364	1052.3	64.62	98.0044	1031.3	26.98
A_052	15.7898	86.1228	0.259202	1.9619	0.09009	0.18334	0.006	0.712679	5.45435	0.178499	0.07761	0.005	1085.2	32.66	1102.53	50.6282	1136.9	125.52	95.4525	1085.2	32.66
A_018	22.7722	122.359	0.836063	1.95587	0.0592465	0.18611	0.00516	0.915287	5.37317	0.148974	0.07622	0.00186	1100.3	28.08	1100.46	33.3349	1100.8	48.62	99.9546	1100.3	28.08
A_118	19.144	102.77	0.612669	1.96588	0.0611429	0.18628	0.00528	0.911334	5.36826	0.15216	0.07654	0.00196	1101.2	28.7	1103.9	34.3335	1109.3	50.2	99.2698	1101.2	28.7
A_137	28.2433	149.42	0.298604	2.00391	0.0627089	0.18902	0.00538	0.909546	5.29045	0.15058	0.07689	0.002	1116.1	29.18	1116.84	34.9494	1118.2	51.38	99.8122	1116.1	29.18
A_133	2.0229	10.5343	0.636618	2.02364	0.153237	0.19203	0.00852	0.585925	5.20752	0.231048	0.07643	0.00938	1132.3	46.04	1123.48	85.0736	1106.4	235.96	102.341	1132.3	46.04
A_106	26.7916	135.222	1.49312	2.15376	0.0659758	0.19813	0.00558	0.919385	5.04719	0.142146	0.07884	0.0019	1165.2	30.06	1166.27	35.726	1168.2	47.48	99.7432	1165.2	30.06
A_078	19.5391	93.8884	0.40243	2.31706	0.0710714	0.20811	0.00584	0.914875	4.80515	0.134843	0.08075	0.002	1218.7	31.22	1217.52	37.3453	1215.4	48.4	100.272	1218.7	31.22
A_004	41.4747	195.857	0.399336	2.39682	0.0714604	0.21176	0.00584	0.924994	4.72233	0.130234	0.08209	0.00186	1238.2	31.06	1241.65	37.0194	1247.7	43.84	99.2386	1238.2	31.06
A_085	36.3434	143.843	0.239326	3.16353	0.0957657	0.25266	0.00708	0.925674	3.95789	0.110907	0.09081	0.00208	1452.2	36.44	1448.3	43.8428	1442.4	43.32	100.679	1452.2	36.44
A_031	13.9202	52.3826	0.867773	3.47349	0.106726	0.26574	0.00744	0.911196	3.76308	0.105356	0.0948	0.0024	1519.2	37.88	1521.22	46.7407	1524.1	47.52	99.6785	1519.2	37.88
A_050	75.4173	283.204	0.116611	3.55021	0.111916	0.2663	0.00754	0.89818	3.75516	0.106323	0.09669	0.00268	1522	38.4	1538.48	48.4986	1561.2	51.66	97.4891	1522	38.4
A_081	101.544	306.269	0.452944	5.17484	0.158016	0.33155	0.00932	0.92058	3.01614	0.0847848	0.1132	0.0027	1845.9	45.16	1848.49	56.4445	1851.5	42.7	99.6975	1845.9	45.16
A_092	8.89441	26.0872	1.45986	5.45083	0.17212	0.34095	0.00974	0.904688	2.93298	0.0837872	0.11595	0.00312	1891.2	46.82	1892.89	59.7714	1894.7	48.02	99.8153	1891.2	46.82
A_038	52.6665	142.027	0.462266	6.39824	0.190517	0.37082	0.01028	0.931015	2.69673	0.0747596	0.12514	0.00272	2033.3	48.36	2032.03	60.5066	2030.8	38.28	100.123	2033.3	48.36
A_047	88.8401	188.029	1.16778	10.6246	0.315401	0.47248	0.0131	0.933979	2.11649	0.0586819	0.16309	0.00346	2494.4	57.38	2490.86	73.9435	2487.9	35.52	100.261	2494.4	57.38
A_086	36.0154	75.7915	0.889273	10.7871	0.325698	0.47519	0.01334	0.929773	2.10442	0.0590774	0.16464	0.00366	2506.3	58.26	2504.95	75.633	2503.9	37.06	100.096	2506.3	58.26
A_057	32.8422	68.5999	0.311345	11.2197	0.356849	0.47875	0.01378	0.904979	2.08877	0.0601218	0.16997	0.0046	2521.8	60.04	2541.56	80.8354	2557.3	44.96	98.6118	2521.8	60.04
7224/7-1 1725.8, Kobbe Formation, Samson Dome
177-112	229.558	13.0825	0.98481	0.693685	0.0313104	0.05699	0.00132	0.513155	17.5469	0.406421	0.08828	0.00342	357.3	8.04	535.012	24.1485	1388.5	73.46	25.7328
177-132	207.237	12.7907	0.370832	0.706326	0.0324457	0.06172	0.00142	0.500853	16.2022	0.372766	0.083	0.0033	386.1	8.64	542.562	24.9231	1269.1	76.64	30.4231
177-131	58.437	3.02412	0.523259	0.43932	0.0305325	0.05175	0.00148	0.4115	19.3237	0.552638	0.06157	0.0039	325.3	9.06	369.773	25.699	659.3	133.2	49.3402
177-057	50.6554	3.18116	0.289271	0.547154	0.0356002	0.0628	0.00174	0.42584	15.9236	0.441194	0.06319	0.00372	392.7	10.58	443.13	28.832	714.5	122.6	54.9615
177-004	29.4467	1.5489	0.366265	0.416365	0.0346322	0.0526	0.0017	0.388559	19.0114	0.614437	0.05741	0.0044	330.4	10.42	353.449	29.399	506.9	165.38	65.1805
177-019	104.884	9.16476	0.245636	0.800225	0.0281937	0.08738	0.00176	0.57169	11.4443	0.230509	0.06642	0.00192	540	10.38	596.956	21.0321	819.5	59.92	65.8938
177-079	138.136	27.2887	0.304335	2.91095	0.068289	0.19755	0.00344	0.742275	5.06201	0.0881464	0.10687	0.00168	1162.1	18.46	1384.76	32.4856	1746.7	28.66	66.5312
177-053	180.632	10.1768	1.45203	0.450864	0.0144129	0.05634	0.00106	0.588551	17.7494	0.333943	0.05804	0.0015	353.3	6.44	377.884	12.0799	530.9	57.08	66.5474
177-078	520.86	34.5018	0.316555	0.551918	0.0192907	0.06624	0.00128	0.552862	15.0966	0.291722	0.06043	0.00176	413.5	7.76	446.252	15.5974	618.8	62.3	66.8229
177-134	51.0143	18.0759	1.00661	9.18523	0.248214	0.35433	0.00668	0.697641	2.82223	0.053206	0.18801	0.00364	1955.2	31.78	2356.64	63.6839	2724.8	31.66	71.7557
177-022	533.996	19.5656	1.30061	0.356413	0.0164234	0.03664	0.00084	0.497526	27.2926	0.625703	0.07055	0.00282	232	5.22	309.533	14.2631	944.5	80.98	74.9516
177-054	323.695	25.8697	0.818534	0.677581	0.0226536	0.07992	0.00154	0.576354	12.5125	0.241107	0.06149	0.00168	495.7	9.18	525.311	17.5628	656.5	58.18	75.5065
177-082	168.884	6.1575	0.35754	0.342899	0.0187136	0.03646	0.0009	0.452307	27.4273	0.677032	0.06821	0.00332	230.9	5.66	299.366	16.3378	874.9	99.36	77.1297
177-084	253.538	21.5837	0.740376	0.7295	0.022962	0.08513	0.00158	0.589643	11.7467	0.218018	0.06215	0.00158	526.7	9.4	556.259	17.5091	679.2	53.54	77.5471
177-126	36.2428	1.99154	0.435106	0.42186	0.0384234	0.05495	0.00188	0.375632	18.1984	0.622619	0.05568	0.0047	344.8	11.44	357.38	32.5505	439.5	182.42	78.4528
177-061	336.96	11.6925	0.859485	0.31228	0.0121977	0.0347	0.00072	0.531213	28.8184	0.597962	0.06527	0.00216	219.9	4.44	275.947	10.7785	783.2	69.02	79.6893
177-080	198.361	12.5602	0.542176	0.496769	0.0176605	0.06332	0.00122	0.541963	15.7928	0.304283	0.0569	0.0017	395.8	7.42	409.513	14.5585	487.1	65.76	81.2564
177-068	155.404	13.5667	0.912659	0.731484	0.02143	0.0873	0.00158	0.617768	11.4548	0.207314	0.06077	0.0014	539.5	9.42	557.424	16.3306	631.1	49.06	85.4857
177-127	183.082	12.7846	0.485744	0.553138	0.0170833	0.06983	0.00126	0.584237	14.3205	0.258396	0.05745	0.00144	435.1	7.58	447.05	13.8069	508.4	54.2	85.5822
177-133	746.433	27.0582	0.49406	0.301538	0.0078347	0.03625	0.00062	0.65827	27.5862	0.471819	0.06033	0.00118	229.6	3.84	267.601	6.95292	615.3	42.24	85.7993
177-096	45.3603	2.48075	0.388766	0.411494	0.0261142	0.05469	0.00142	0.409136	18.2849	0.474758	0.05457	0.00316	343.2	8.68	349.95	22.2085	394.6	126.74	86.9742
177-013	834.964	35.7866	0.21711	0.347363	0.00809489	0.04286	0.00074	0.740886	23.3318	0.402835	0.05878	0.00092	270.5	4.6	302.735	7.05491	558.8	34.18	89.3519
177-058	191.7	9.86486	1.3591	0.381585	0.0128872	0.05146	0.00098	0.563883	19.4326	0.370072	0.05378	0.0015	323.4	5.98	328.204	11.0844	361.7	62.86	89.4111
177-059	127.61	4.23409	0.370853	0.231213	0.0187814	0.03318	0.00102	0.37845	30.1386	0.926504	0.05054	0.0038	210.4	6.34	211.2	17.1557	220.1	169.72	99.6213	210.4	6.34
177-119	140.869	5.06142	0.962456	0.270539	0.0191764	0.03593	0.001	0.39265	27.8319	0.774614	0.05461	0.00356	227.6	6.26	243.125	17.2332	396.3	141.18	93.6144	227.6	6.26
177-136	397.766	14.7253	1.44873	0.289313	0.0103443	0.03702	0.0007	0.528843	27.0124	0.51077	0.05668	0.00172	234.3	4.36	258.018	9.22539	478.2	67.04	90.8075	234.3	4.36
177-030	134.635	5.16326	0.633739	0.271735	0.015754	0.03835	0.00094	0.422782	26.0756	0.639142	0.05139	0.0027	242.6	5.86	244.08	14.1507	258.5	118.44	99.3937	242.6	5.86
177-075	294.606	11.4484	0.239664	0.277277	0.00988657	0.03886	0.00074	0.534069	25.7334	0.490034	0.05175	0.00156	245.8	4.62	248.495	8.86032	274.3	68.54	98.9153	245.8	4.62
177-034	84.9975	3.3183	0.358207	0.28669	0.0156377	0.03904	0.00092	0.432032	25.6148	0.603626	0.05326	0.00262	246.9	5.76	255.951	13.961	339.9	109.58	96.464	246.9	5.76
177-137	71.0993	2.79918	0.418788	0.277768	0.0221437	0.03937	0.00118	0.375966	25.4001	0.761292	0.05117	0.00378	248.9	7.28	248.885	19.8412	248.4	165.8	100.006	248.9	7.28
177-011	114.253	4.54613	0.349146	0.299	0.0202022	0.03979	0.0011	0.409158	25.1319	0.694776	0.0545	0.00336	251.5	6.82	265.619	17.9468	391.6	134.12	94.6844	251.5	6.82
177-135	302.522	12.2461	0.883506	0.287106	0.00914856	0.04048	0.00072	0.55819	24.7036	0.439391	0.05144	0.00136	255.8	4.52	256.279	8.16626	260.4	60	99.813	255.8	4.52
177-051	198.52	8.10559	0.428694	0.317118	0.0160552	0.04083	0.00094	0.454728	24.4918	0.563857	0.05633	0.00254	258	5.84	279.683	14.16	464.6	99.58	92.2473	258	5.84
177-095	110.839	4.56324	0.196614	0.293646	0.0138756	0.04117	0.00088	0.45235	24.2895	0.519184	0.05173	0.00218	260.1	5.48	261.425	12.3531	273.4	94.7	99.493	260.1	5.48
177-120	313.824	12.9421	0.450093	0.295397	0.0103872	0.04124	0.00078	0.537875	24.2483	0.458625	0.05195	0.00154	260.5	4.78	262.798	9.24097	283.4	67.02	99.1255	260.5	4.78
177-032	147.38	6.26219	0.483376	0.304877	0.0160994	0.04249	0.001	0.445687	23.5349	0.553894	0.05204	0.00246	268.2	6.14	270.203	14.2683	287.2	106.54	99.2588	268.2	6.14
177-086	105.926	4.60991	0.330738	0.310648	0.0220724	0.04352	0.00122	0.39454	22.9779	0.644143	0.05177	0.00338	274.6	7.48	274.683	19.517	275.3	145.98	99.9698	274.6	7.48
177-103	31.504	1.41075	0.273724	0.357675	0.0491249	0.04478	0.00222	0.360957	22.3314	1.10709	0.05793	0.00742	282.4	13.66	310.478	42.6426	526.7	270.06	90.9566	282.4	13.66
177-104	464.218	21.1637	0.616158	0.341201	0.011835	0.04559	0.00086	0.54384	21.9346	0.41377	0.05428	0.00158	287.4	5.3	298.082	10.3393	382.5	64.9	96.4165	287.4	5.3
177-139	30.542	1.41623	0.918567	0.334891	0.0383604	0.04637	0.00186	0.350184	21.5657	0.865045	0.05238	0.00562	292.2	11.48	293.293	33.5955	302.1	235.66	99.6272	292.2	11.48
177-102	549.077	25.7737	0.577636	0.377517	0.00969231	0.04694	0.0008	0.663828	21.3038	0.363081	0.05833	0.00112	295.7	4.98	325.209	8.34938	541.4	43.22	90.926	295.7	4.98
177-007	83.0832	3.95144	1.26815	0.34624	0.0197975	0.04756	0.00118	0.433917	21.0261	0.521673	0.0528	0.00272	299.5	7.22	301.889	17.2616	320.1	115.14	93.5645	299.5	7.22
177-077	191.931	9.24917	1.50453	0.347703	0.0133637	0.04819	0.00096	0.51832	20.7512	0.413388	0.05233	0.00172	303.4	5.86	302.992	11.6452	299.7	74.42	101.235	303.4	5.86
177-046	102.004	5.07979	0.494776	0.360625	0.0206608	0.0498	0.00122	0.427601	20.0803	0.491928	0.05252	0.00272	313.3	7.5	312.681	17.914	308	115.5	101.721	313.3	7.5
177-012	56.4894	2.84142	0.750993	0.366673	0.0342029	0.0503	0.00174	0.370849	19.8807	0.687723	0.05287	0.00458	316.4	10.72	317.184	29.5867	323.1	190.76	97.9263	316.4	10.72
177-092	288.179	14.9075	0.512551	0.378737	0.0111172	0.05173	0.00092	0.605882	19.3311	0.343798	0.0531	0.00124	325.2	5.66	326.109	9.57237	332.8	52.42	97.7163	325.2	5.66
177-065	56.2687	2.9271	0.574668	0.379211	0.0296653	0.05202	0.00156	0.383343	19.2234	0.57648	0.05287	0.00382	326.9	9.58	326.457	25.5384	323.3	159.92	101.114	326.9	9.58
177-125	255.247	13.3162	0.946861	0.381599	0.0117231	0.05217	0.00094	0.586507	19.1681	0.345371	0.05305	0.00132	327.8	5.72	328.214	10.083	330.7	56.2	99.1231	327.8	5.72
177-021	179.791	9.39048	0.407059	0.386287	0.0138929	0.05223	0.00102	0.542996	19.1461	0.373904	0.05364	0.00162	328.2	6.28	331.653	11.928	355.9	67.7	92.2169	328.2	6.28
177-062	118.695	6.2469	0.689148	0.38344	0.0242432	0.05263	0.00138	0.414718	19.0006	0.49821	0.05284	0.00304	330.7	8.42	329.566	20.837	321.9	128.42	102.734	330.7	8.42
177-069	443.951	23.5738	0.790485	0.390818	0.0105066	0.0531	0.00094	0.658488	18.8324	0.333379	0.05338	0.00108	333.5	5.7	334.967	9.00508	345.1	45.56	96.6387	333.5	5.7
177-029	310.833	16.6265	0.843952	0.398851	0.0161098	0.05349	0.0011	0.509145	18.6951	0.384457	0.05408	0.00188	335.9	6.74	340.814	13.7657	374.1	77.6	89.7888	335.9	6.74
177-088	22.2941	1.20054	0.910696	0.3927	0.034494	0.05385	0.00174	0.367859	18.5701	0.600037	0.05289	0.00432	338.1	10.6	336.34	29.5434	324.2	179.98	104.287	338.1	10.6
177-070	130.785	7.12383	1.10028	0.403755	0.0258856	0.05447	0.00144	0.412349	18.3587	0.485342	0.05376	0.00314	341.9	8.8	344.368	22.0781	360.7	128.84	94.7879	341.9	8.8
177-017	153.5	8.37499	0.452075	0.403896	0.0193843	0.05456	0.00122	0.465912	18.3284	0.409837	0.05369	0.00228	342.5	7.5	344.47	16.5323	358	94.9	95.6704	342.5	7.5
177-117	91.711	5.01109	0.708593	0.398837	0.0176097	0.05464	0.00114	0.472541	18.3016	0.381842	0.05294	0.00206	342.9	6.96	340.805	15.0474	326.1	86.84	105.152	342.9	6.96
177-110	189.69	10.4595	0.605781	0.413131	0.0157675	0.05514	0.00108	0.513194	18.1357	0.355214	0.05434	0.00178	346	6.6	351.127	13.4011	385.1	72.36	89.8468	346	6.6
177-047	137.489	7.8259	0.612824	0.42168	0.0194191	0.05692	0.00124	0.473053	17.5685	0.382729	0.05373	0.00218	356.9	7.58	357.252	16.4521	359.7	90.82	99.2216	356.9	7.58
177-111	100.388	5.76328	0.588946	0.425389	0.0171854	0.05741	0.00116	0.500148	17.4186	0.351952	0.05374	0.00188	359.8	7.02	359.897	14.5395	360	78.5	99.9444	359.8	7.02
177-100	381.36	21.913	1.73523	0.429642	0.0114829	0.05746	0.001	0.651161	17.4034	0.302879	0.05423	0.0011	360.2	6.06	362.922	9.69972	380.3	45.76	94.7147	360.2	6.06
177-064	282.357	16.2666	1.04166	0.42838	0.0121813	0.05761	0.00102	0.622643	17.3581	0.30733	0.05393	0.0012	361.1	6.28	362.026	10.2944	368.1	49.6	98.0983	361.1	6.28
177-091	114.626	6.72508	0.457569	0.440226	0.0175977	0.05867	0.00118	0.503135	17.0445	0.342807	0.05442	0.00188	367.5	7.18	370.412	14.807	388.3	76.3	94.6433	367.5	7.18
177-067	146.027	8.58494	0.765434	0.437803	0.0152838	0.05879	0.00112	0.54571	17.0097	0.324049	0.05401	0.00158	368.3	6.84	368.702	12.8715	371.4	65.26	99.1653	368.3	6.84
177-024	239.998	14.1671	0.755113	0.438532	0.0137588	0.05903	0.0011	0.593937	16.9405	0.31568	0.05388	0.00136	369.7	6.72	369.217	11.5841	366.1	56.7	100.983	369.7	6.72
177-076	215.936	12.8806	0.561257	0.449389	0.0210805	0.05965	0.00132	0.471742	16.7645	0.370982	0.05464	0.00226	373.5	7.96	376.851	17.6778	397.6	91.04	93.9386	373.5	7.96
177-071	767.11	46.7784	0.778116	0.457307	0.0104112	0.06098	0.00102	0.734718	16.3988	0.2743	0.05439	0.00084	381.6	6.26	382.383	8.70544	387.1	34.8	98.5792	381.6	6.26
177-008	186.66	12.0452	0.410258	0.488556	0.0151315	0.06453	0.0012	0.600416	15.4967	0.288176	0.05491	0.00136	403.1	7.32	403.926	12.5103	408.6	54.06	98.6539	403.1	7.32
177-052	159.254	10.5968	1.27265	0.510563	0.0162808	0.06654	0.00124	0.584401	15.0286	0.280063	0.05565	0.00144	415.3	7.52	418.828	13.3556	438.3	56.38	94.7525	415.3	7.52
177-010	69.634	4.67384	0.742881	0.513162	0.0353302	0.06712	0.0019	0.41116	14.8987	0.421745	0.05545	0.00348	418.8	11.52	420.573	28.9556	430.3	136.74	97.3274	418.8	11.52
177-130	602.265	41.3154	0.532548	0.526653	0.0135521	0.0686	0.00116	0.657131	14.5773	0.246496	0.05568	0.00108	427.7	7.02	429.586	11.0543	439.2	41.7	97.3816	427.7	7.02
177-066	83.0956	5.8009	0.498999	0.536616	0.0363145	0.06981	0.00194	0.410646	14.3246	0.398076	0.05575	0.00344	435	11.72	436.191	29.5184	441.9	134.16	98.4386	435	11.72
177-043	51.2462	3.58313	0.757443	0.547681	0.0269943	0.06992	0.0016	0.464274	14.3021	0.327278	0.05681	0.00248	435.7	9.6	443.476	21.8582	483.4	95.32	90.1324	435.7	9.6
177-074	103.858	7.29912	0.425067	0.544202	0.021113	0.07028	0.00142	0.520795	14.2288	0.287491	0.05616	0.00186	437.8	8.5	441.191	17.1166	458.2	72.28	95.5478	437.8	8.5
177-099	297.416	24.0282	0.539661	0.64285	0.0167257	0.08079	0.0014	0.666034	12.3778	0.214493	0.05771	0.00112	500.8	8.32	504.069	13.1149	518.6	41.42	96.5677	500.8	8.32
177-098	107.42	8.96634	0.947401	0.665326	0.0248861	0.08347	0.00164	0.525281	11.9804	0.235387	0.05781	0.00184	516.8	9.78	517.867	19.3704	522.4	69.16	98.928	516.8	9.78
177-113	196.266	17.1909	0.735943	0.701789	0.0233675	0.08759	0.00164	0.56232	11.4168	0.213764	0.05811	0.0016	541.3	9.7	539.859	17.9757	533.6	60.34	101.443	541.3	9.7
177-138	110.632	9.70351	0.15135	0.709886	0.026659	0.08771	0.00172	0.522184	11.4012	0.223579	0.0587	0.00188	542	10.16	544.678	20.4548	555.9	68.9	97.4996	542	10.16
177-049	161.181	14.2065	0.649873	0.713609	0.0233329	0.08814	0.00168	0.582945	11.3456	0.216254	0.05872	0.00156	544.5	9.92	546.887	17.8816	556.7	57.2	97.8085	544.5	9.92
177-085	63.536	5.60642	0.729506	0.71746	0.0437005	0.08824	0.00232	0.431653	11.3327	0.297959	0.05897	0.00324	545.1	13.76	549.167	33.4497	566.2	117.34	96.2734	545.1	13.76
177-094	65.6254	5.81638	0.588464	0.727353	0.0356209	0.08863	0.00202	0.465383	11.2829	0.257152	0.05952	0.00258	547.4	11.96	554.998	27.1801	586.2	92.5	93.3811	547.4	11.96
177-081	229.299	20.3663	0.883787	0.734545	0.0205961	0.08882	0.00158	0.634425	11.2587	0.200279	0.05998	0.0013	548.6	9.4	559.217	15.68	602.8	46.66	91.0086	548.6	9.4
177-018	44.788	4.07795	1.70506	0.737923	0.0339284	0.09105	0.00204	0.487302	10.983	0.246077	0.05878	0.00236	561.7	12.02	561.193	25.8026	558.9	86.34	100.501	561.7	12.02
177-121	66.2248	6.03308	0.8815	0.75315	0.0333433	0.0911	0.00196	0.485971	10.9769	0.236167	0.05996	0.00232	562	11.54	570.05	25.2372	602	82.4	93.3555	562	11.54
177-050	75.013	7.00321	0.618961	0.781488	0.0344015	0.09336	0.00204	0.49638	10.7112	0.23405	0.06071	0.00232	575.4	12.04	586.332	25.8106	629	81.12	91.4785	575.4	12.04
177-128	141.382	13.2221	0.282888	0.760133	0.0261756	0.09352	0.00176	0.546515	10.6929	0.201235	0.05895	0.0017	576.3	10.44	574.087	19.769	565.1	61.96	101.982	576.3	10.44
177-087	19.3474	1.85484	1.37694	0.786901	0.0531461	0.09587	0.00268	0.413905	10.4308	0.291588	0.05953	0.00366	590.2	15.78	589.412	39.808	586.6	130.9	100.614	590.2	15.78
177-006	53.5662	8.89307	0.477367	1.64837	0.0527573	0.16602	0.00326	0.613521	6.02337	0.118276	0.07201	0.00182	990.2	18.08	988.926	31.6513	986.3	51.14	100.395	990.2	18.08
177-063	187.067	31.3318	0.642686	1.71031	0.0590297	0.16749	0.00336	0.581237	5.97051	0.119774	0.07406	0.00208	998.3	18.58	1012.4	34.9421	1043.2	56.16	95.6959	998.3	18.58
177-097	75.4434	13.5602	0.290578	1.87307	0.100909	0.17974	0.0047	0.485372	5.56359	0.145482	0.07558	0.00356	1065.5	25.72	1071.61	57.7321	1083.9	93.1	98.3024	1065.5	25.72
177-116	22.632	4.26953	0.526703	2.12614	0.14135	0.18865	0.00588	0.468831	5.30082	0.16522	0.08174	0.0048	1114.1	31.9	1157.33	76.9419	1239.4	112.86	89.8903	1114.1	31.9
177-025	115.056	22.07	0.290724	2.05052	0.0561298	0.19182	0.00356	0.677996	5.21322	0.0967525	0.07753	0.00156	1131.2	19.2	1132.47	30.9996	1134.6	40.28	99.7003	1131.2	19.2
177-044	9.8686	1.95882	0.701227	2.18121	0.143799	0.19849	0.00614	0.469215	5.03804	0.155844	0.0797	0.00464	1167.2	33	1175.07	77.4675	1189.6	112.88	98.117	1167.2	33
177-035	79.6987	16.127	0.460312	2.22447	0.0632035	0.20235	0.0038	0.660946	4.94193	0.0928062	0.07973	0.0017	1187.9	20.38	1188.78	33.7766	1190.4	41.88	99.79	1187.9	20.38
177-114	459.024	93.2002	0.183353	2.23793	0.0483567	0.20304	0.00334	0.761299	4.92514	0.0810183	0.07994	0.00112	1191.6	17.94	1193.01	25.7783	1195.4	27.56	99.6821	1191.6	17.94
177-048	67.2486	13.8263	0.414358	2.26927	0.0630361	0.2056	0.0038	0.66536	4.86381	0.0898954	0.08005	0.00166	1205.3	20.36	1202.79	33.4113	1198.2	40.48	100.593	1205.3	20.36
177-016	182.309	46.2556	0.632102	3.22053	0.0702905	0.25372	0.0044	0.794563	3.94135	0.0683507	0.09206	0.00122	1457.6	22.66	1462.11	31.9117	1468.4	25.22	99.2645	1457.6	22.66
177-129	54.1978	13.9245	1.44447	3.27602	0.106165	0.25692	0.00506	0.60774	3.89226	0.0766575	0.09248	0.00238	1474.1	25.92	1475.38	47.812	1477.2	48.6	99.7901	1474.1	25.92
177-083	191.354	51.4532	0.492196	3.53024	0.0833726	0.26889	0.00468	0.736974	3.71899	0.0647287	0.09522	0.00152	1535.2	23.74	1534.02	36.2284	1532.5	30.04	100.176	1535.2	23.74
177-033	71.5211	19.3114	0.458359	3.54494	0.0913284	0.27001	0.00496	0.713026	3.70357	0.0680334	0.09522	0.00172	1540.9	25.14	1537.31	39.6056	1532.5	33.68	100.548	1540.9	25.14
177-009	61.2394	17.5047	0.574372	3.95693	0.115324	0.28584	0.00562	0.67461	3.49846	0.0687845	0.1004	0.00216	1620.7	28.16	1625.41	47.3722	1631.5	39.56	99.338	1620.7	28.16
177-020	150.665	47.2741	0.40231	4.64424	0.0997258	0.31377	0.00544	0.807411	3.18705	0.0552556	0.10735	0.00136	1759.3	26.68	1757.26	37.7336	1754.9	23.06	100.251	1759.3	26.68
177-093	267.834	84.7908	0.27926	4.73996	0.102558	0.31658	0.00532	0.776668	3.15876	0.0530817	0.10859	0.00148	1773	26	1774.33	38.3909	1775.9	24.74	99.8367	1773	26
177-023	53.0309	16.8384	1.13692	4.76673	0.130174	0.31752	0.00608	0.701176	3.14941	0.0603061	0.10888	0.00212	1777.6	29.72	1779.06	48.5842	1780.7	35.22	99.8259	1777.6	29.72
177-115	63.9208	20.4463	0.539318	4.82406	0.122537	0.31987	0.0057	0.701528	3.12627	0.0557093	0.10938	0.00198	1789.1	27.8	1789.1	45.4455	1789	32.88	100.006	1789.1	27.8
177-036	62.342	28.7503	0.766703	10.163	0.227749	0.46117	0.0082	0.793445	2.1684	0.038556	0.15983	0.00218	2444.7	36.22	2449.72	54.8974	2453.8	22.9	99.6291	2444.7	36.22
177-118	64.2575	31.2356	0.768753	11.4141	0.267619	0.4861	0.0085	0.745792	2.05719	0.0359723	0.1703	0.00266	2553.8	36.92	2557.58	59.966	2560.6	26.1	99.7344	2553.8	36.92
177-060	187.404	94.4364	0.9182	12.4224	0.25335	0.50392	0.00848	0.825125	1.98444	0.0333943	0.17879	0.00206	2630.6	36.38	2636.87	53.7779	2641.7	18.98	99.5798	2630.6	36.38
177-101	49.5576	25.3016	0.583453	12.7428	0.329597	0.51055	0.00964	0.729998	1.95867	0.0369829	0.18102	0.0032	2659	41.12	2660.83	68.8231	2662.3	29.14	99.876	2659	41.12
177-031	105.116	55.4549	0.896407	13.785	0.285805	0.52756	0.0091	0.831964	1.89552	0.0326962	0.18951	0.00218	2731.2	38.44	2735.05	56.7061	2737.9	18.88	99.7553	2731.2	38.44
177-037	92.2747	50.6367	1.3655	15.1493	0.319044	0.54876	0.00954	0.825481	1.82229	0.0316799	0.20022	0.00238	2820	39.7	2824.67	59.4876	2828	19.36	99.7171	2820	39.7
7226/2-1 1748, Kobbe Formation, Bjarmeland Platform
A_118	646.149	24.9543	0.132536	0.305757	0.0126839	0.03862	0.00138	0.86137	25.8933	0.92524	0.05742	0.00242	244.3	8.54	270.887	11.2374	507.4	92.36	48.1474
A_109	521.49	86.39	0.272827	2.7679	0.101632	0.16566	0.00576	0.946948	6.03646	0.209888	0.12118	0.00286	988.1	31.82	1346.92	49.4563	1973.7	41.84	50.0633
A_091	431.769	102.921	1.63753	5.30793	0.193617	0.23837	0.00826	0.949971	4.19516	0.145371	0.1615	0.00368	1378.2	43.04	1870.14	68.217	2471.5	38.26	55.7637
A_108	1998.59	124.532	0.377096	0.537558	0.0204006	0.06231	0.00218	0.921895	16.0488	0.561489	0.06257	0.00184	389.7	13.22	436.813	16.5773	693.6	61.92	56.1851
A_009	68.5086	13.1769	0.830577	3.17416	0.133792	0.19234	0.00706	0.870833	5.19913	0.190838	0.11969	0.00496	1134	38.16	1450.89	61.1556	1951.6	73.22	58.1062
A_049	46.7107	2.72697	0.17505	0.479424	0.0300766	0.05838	0.00238	0.649837	17.1292	0.698311	0.05956	0.00568	365.8	14.54	397.678	24.9482	587.7	200.38	62.2426
A_065	1399.77	207.138	0.246423	1.71695	0.0623623	0.14798	0.00512	0.952584	6.75767	0.23381	0.08415	0.00186	889.7	28.78	1014.89	36.8622	1295.9	42.76	68.655
A_057	111.825	19.5436	0.525388	2.26274	0.0850271	0.17477	0.00612	0.931882	5.72181	0.200363	0.0939	0.00256	1038.3	33.54	1200.76	45.121	1506	51.1	68.9442
A_048	192.316	10.3966	0.747854	0.424419	0.0165442	0.05406	0.0019	0.901626	18.498	0.650132	0.05694	0.00192	339.4	11.6	359.206	14.0021	488.4	73.94	69.4922
A_092	542.92	176.862	0.565279	7.27501	0.265405	0.32576	0.0113	0.950834	3.06974	0.106484	0.16197	0.00366	1817.8	54.92	2145.75	78.2807	2476.3	37.86	73.4079
A_005	180.212	20.546	0.474224	1.10242	0.041224	0.11401	0.00398	0.933551	8.77116	0.306194	0.07013	0.00188	696	22.98	754.521	28.2146	932.1	54.62	74.6701
A_085	227.877	54.2302	0.41936	3.64418	0.134307	0.23798	0.00828	0.944044	4.20203	0.146201	0.11106	0.0027	1376.2	43.12	1559.24	57.4659	1816.8	43.78	75.7486
A_069	169.093	14.1125	0.606497	0.711161	0.0405946	0.08346	0.00332	0.696882	11.9818	0.47663	0.0618	0.00506	516.8	19.7	545.436	31.1346	667	170.32	77.4813
A_132	634.361	118.416	0.311238	2.24101	0.0824391	0.18667	0.00648	0.943652	5.35705	0.185963	0.08707	0.00212	1103.3	35.24	1193.97	43.9222	1362	46.74	81.0059
A_055	59.9041	3.13718	0.428372	0.392882	0.0223198	0.05237	0.00204	0.685677	19.0949	0.743815	0.05441	0.0045	329	12.5	336.473	19.1152	388.1	179.1	84.772
A_004	88.2859	20.1416	0.683489	3.00876	0.119141	0.22814	0.00812	0.898839	4.38327	0.15601	0.09565	0.00332	1324.7	42.64	1409.84	55.8268	1541	64.44	85.9637
A_111	47.5882	7.76545	0.64667	1.74054	0.0687279	0.16318	0.00578	0.897042	6.1282	0.217067	0.07736	0.0027	974.4	32.04	1023.66	40.4209	1130.5	68.56	86.192
A_098	280.214	14.5151	0.349183	0.385821	0.0183503	0.0518	0.00192	0.779315	19.305	0.715553	0.05402	0.00322	325.5	11.7	331.312	15.7578	371.6	131.14	87.5942
A_097	153.674	7.40404	0.426746	0.354341	0.0225479	0.04818	0.00196	0.639299	20.7555	0.84435	0.05334	0.00522	303.4	12.1	307.981	19.5979	343.1	213.82	88.429
A_102	132.079	24.0568	0.26389	2.02389	0.0792925	0.18214	0.00644	0.902477	5.49028	0.194122	0.08059	0.00272	1078.7	35.14	1123.57	44.0193	1211.5	65.6	89.0384
A_016	6223.46	240.35	17.8319	0.275512	0.0100625	0.03862	0.00134	0.95001	25.8933	0.898422	0.05174	0.00118	244.3	8.3	247.091	9.02446	273.8	51.72	89.2257
A_063	48.3887	3.89093	0.869224	0.651246	0.0385446	0.08041	0.00322	0.676594	12.4363	0.498007	0.05874	0.00512	498.6	19.16	509.245	30.1401	557.5	184.3	89.435
A_047	981.296	37.5248	0.295294	0.269848	0.00994363	0.03824	0.00132	0.936765	26.1506	0.902689	0.05118	0.00132	241.9	8.24	242.572	8.93854	248.9	58.82	97.1876	241.9	8.24
A_114	1782.52	74.1706	0.0309237	0.296899	0.0109503	0.04161	0.00144	0.938311	24.0327	0.831701	0.05175	0.00132	262.8	8.96	263.976	9.73603	274.2	58.1	95.8425	262.8	8.96
A_136	113.863	5.13863	0.682088	0.323385	0.0171218	0.04513	0.00172	0.719835	22.1582	0.844496	0.05197	0.00382	284.6	10.58	284.503	15.0632	283.9	163.66	100.247	284.6	10.58
A_126	195.65	9.0175	0.447991	0.33128	0.015267	0.04609	0.00168	0.790944	21.6967	0.790853	0.05213	0.00294	290.4	10.38	290.543	13.3896	291.2	125.74	99.7253	290.4	10.38
A_117	211.089	9.76286	0.270211	0.332494	0.0176513	0.04625	0.00176	0.716819	21.6216	0.82279	0.05214	0.00386	291.5	10.86	291.468	15.4733	291.5	164.88	100	291.5	10.86
A_113	859.326	41.5656	0.659319	0.35207	0.013113	0.04837	0.00168	0.932525	20.674	0.718054	0.05279	0.00142	304.5	10.36	306.277	11.4074	319.7	60.34	95.2455	304.5	10.36
A_006	434.916	21.3848	0.436709	0.357012	0.0142116	0.04917	0.00174	0.888972	20.3376	0.719696	0.05266	0.00192	309.4	10.64	309.981	12.3395	314.2	81.4	98.4723	309.4	10.64
A_021	309.27	15.3182	0.737307	0.360104	0.0138623	0.04953	0.00174	0.912582	20.1898	0.709272	0.05273	0.00166	311.6	10.64	312.292	12.0218	317.2	70.58	98.2346	311.6	10.64
A_089	224.673	11.2494	0.339985	0.364237	0.0150463	0.05007	0.00178	0.86059	19.972	0.710011	0.05276	0.00222	315	10.94	315.373	13.0278	318.6	94.46	98.8701	315	10.94
A_129	147.338	7.40523	0.489433	0.36749	0.0235374	0.05026	0.00206	0.63993	19.8965	0.815497	0.05303	0.00522	316.1	12.62	317.791	20.3542	330	215.3	95.7879	316.1	12.62
A_018	270.585	13.6754	0.570871	0.369049	0.0171089	0.05054	0.00184	0.785316	19.7863	0.720356	0.05296	0.00304	317.8	11.34	318.949	14.7863	326.8	127.7	97.246	317.8	11.34
A_051	133.768	7.0335	0.659495	0.387136	0.0184922	0.05258	0.00194	0.772423	19.0186	0.701715	0.0534	0.00324	330.3	11.86	332.275	15.8717	345.9	134.36	95.49	330.3	11.86
A_035	133.235	7.0055	0.564228	0.386338	0.0164811	0.05258	0.00188	0.838142	19.0186	0.680012	0.05329	0.00248	330.4	11.54	331.691	14.1499	340.9	103.52	96.9199	330.4	11.54
A_135	278.836	15.0125	0.243583	0.399308	0.0178265	0.05384	0.00196	0.815443	18.5736	0.676155	0.05379	0.00278	338.1	11.94	341.146	15.2299	361.9	114.8	93.4236	338.1	11.94
A_042	316.827	17.0928	0.284194	0.395289	0.0162743	0.05395	0.00192	0.864412	18.5357	0.659657	0.05314	0.0022	338.7	11.72	338.225	13.925	334.9	92.64	101.135	338.7	11.72
A_052	210.802	11.5751	0.1503	0.403382	0.0163559	0.05491	0.00194	0.871349	18.2116	0.643426	0.05328	0.00212	344.6	11.88	344.098	13.9521	340.9	89.14	101.085	344.6	11.88
A_060	495.484	27.2516	0.215487	0.404878	0.0164253	0.055	0.00194	0.869458	18.1818	0.641322	0.05339	0.00214	345.2	11.9	345.18	14.0035	345.2	89.36	100	345.2	11.9
A_017	598.523	32.9547	0.742942	0.409495	0.0152899	0.05506	0.00192	0.933917	18.162	0.633328	0.05394	0.00144	345.5	11.7	348.511	13.0129	368.4	59.94	93.7839	345.5	11.7
A_032	219.808	12.1686	0.393223	0.406612	0.0187408	0.05536	0.00202	0.791675	18.0636	0.659112	0.05327	0.003	347.3	12.36	346.432	15.9671	340.3	125.06	102.057	347.3	12.36
A_131	97.347	5.41541	0.39807	0.411203	0.0198983	0.05563	0.00206	0.765243	17.9759	0.665655	0.05361	0.00334	349	12.6	349.741	16.9241	354.6	137.2	98.4208	349	12.6
A_099	312.229	17.4755	0.473409	0.418578	0.0177981	0.05597	0.002	0.840383	17.8667	0.638439	0.05424	0.0025	351	12.26	355.034	15.0962	380.7	101.66	92.1986	351	12.26
A_077	154.491	8.85386	0.26465	0.420539	0.0225363	0.05731	0.0022	0.716336	17.449	0.669826	0.05322	0.00398	359.2	13.36	356.437	19.1011	338.3	164.48	106.178	359.2	13.36
A_030	369.316	21.2135	0.419854	0.428779	0.0161572	0.05744	0.002	0.924024	17.4095	0.606179	0.05414	0.00156	360	12.2	362.31	13.6525	376.6	64.62	95.5921	360	12.2
A_110	654.512	37.6082	0.147422	0.429483	0.0174076	0.05746	0.00204	0.875935	17.4034	0.617873	0.05421	0.00212	360.2	12.4	362.81	14.7052	379.7	86.36	94.8644	360.2	12.4
A_094	608.824	34.9952	0.292683	0.4225	0.0165067	0.05748	0.00202	0.899501	17.3974	0.611389	0.05331	0.00182	360.3	12.32	357.837	13.9804	341.9	76.02	105.382	360.3	12.32
A_080	706.718	40.6433	0.603753	0.429143	0.0168509	0.05751	0.00202	0.894515	17.3883	0.610752	0.05412	0.0019	360.5	12.34	362.568	14.2367	375.9	78.48	95.9032	360.5	12.34
A_014	128.234	7.39012	0.530987	0.429483	0.0177789	0.05763	0.00204	0.855111	17.3521	0.614233	0.05405	0.00232	361.2	12.5	362.809	15.0189	372.9	95.26	96.8624	361.2	12.5
A_107	112.653	6.53277	0.472664	0.428887	0.0259213	0.05799	0.00232	0.661943	17.2444	0.689893	0.05364	0.00486	363.4	14.14	362.386	21.9021	355.7	198.02	102.165	363.4	14.14
A_011	371.535	21.5602	0.0632557	0.433664	0.0165242	0.05803	0.00202	0.913546	17.2325	0.599855	0.0542	0.00168	363.6	12.36	365.775	13.9374	379.1	68.98	95.9114	363.6	12.36
A_119	264.259	15.3587	0.3671	0.432173	0.0166946	0.05812	0.00204	0.908627	17.2058	0.603919	0.05393	0.00174	364.2	12.42	364.718	14.0889	367.9	71.86	98.9943	364.2	12.42
A_130	43.0616	2.50274	0.189286	0.431371	0.0243347	0.05812	0.00226	0.6893	17.2058	0.669048	0.05383	0.0044	364.2	13.74	364.15	20.5426	363.8	179.18	100.11	364.2	13.74
A_041	54.0209	3.15212	0.421379	0.43686	0.0250572	0.05835	0.00228	0.681245	17.138	0.669658	0.0543	0.00456	365.6	13.92	368.036	21.1096	383.4	182.2	95.3573	365.6	13.92
A_033	493.155	28.8989	0.428345	0.437196	0.0163521	0.0586	0.00204	0.930755	17.0648	0.594066	0.05411	0.00148	367.1	12.42	368.274	13.7742	375.7	61	97.7109	367.1	12.42
A_058	92.7895	5.4588	0.493452	0.437209	0.0244323	0.05883	0.00228	0.693522	16.9981	0.658775	0.0539	0.00434	368.5	13.92	368.282	20.5805	366.9	176.02	100.436	368.5	13.92
A_086	176.445	10.5549	0.252998	0.45133	0.0216334	0.05982	0.00222	0.774239	16.7168	0.620383	0.05472	0.00332	374.5	13.46	378.21	18.1286	400.1	132.76	93.6016	374.5	13.46
A_106	171.474	10.3142	0.392206	0.446521	0.0233525	0.06015	0.00228	0.724783	16.6251	0.630179	0.05384	0.00388	376.5	13.92	374.84	19.6037	364.4	158.34	103.321	376.5	13.92
A_081	432.282	27.1733	0.425552	0.474526	0.0202098	0.06286	0.00226	0.844172	15.9084	0.571952	0.05475	0.0025	393	13.66	394.31	16.7935	401.9	99.98	97.7855	393	13.66
A_023	467.86	30.2191	0.341713	0.492573	0.0219233	0.06459	0.00234	0.81398	15.4823	0.5609	0.05531	0.00286	403.5	14.18	406.662	18.0997	425.1	111.72	94.9188	403.5	14.18
A_050	218.71	15.185	0.392711	0.530823	0.020251	0.06943	0.00242	0.913634	14.403	0.50202	0.05545	0.00172	432.7	14.64	432.356	16.4944	430.1	67.02	100.605	432.7	14.64
A_062	50.5324	3.55546	0.415312	0.539195	0.0248988	0.07036	0.00258	0.794076	14.2126	0.521156	0.05558	0.00312	438.4	15.5	437.893	20.2209	435.4	121.76	100.689	438.4	15.5
A_045	120.365	9.72188	1.47587	0.642469	0.0299921	0.08077	0.00298	0.790336	12.3808	0.456789	0.05769	0.0033	500.7	17.72	503.833	23.5202	517.7	123.84	96.7162	500.7	17.72
A_079	96.4243	7.84701	0.717019	0.652931	0.0313296	0.08138	0.00302	0.773395	12.288	0.456007	0.05819	0.00354	504.4	18.04	510.281	24.4848	536.3	131.72	94.0518	504.4	18.04
A_083	1199.91	98.9208	0.100842	0.656207	0.0240415	0.08244	0.00286	0.946908	12.13	0.420814	0.05773	0.00136	510.7	17.02	512.291	18.7688	519.1	51.96	98.3818	510.7	17.02
A_124	144.733	12.0563	0.780694	0.664086	0.0292747	0.0833	0.00302	0.82242	12.0048	0.435228	0.05782	0.0029	515.8	17.98	517.11	22.7956	522.7	108.54	98.6799	515.8	17.98
A_066	275.874	23.303	0.824121	0.678305	0.0259778	0.08447	0.00296	0.91498	11.8385	0.414846	0.05824	0.0018	522.7	17.58	525.75	20.1352	538.3	68.18	97.102	522.7	17.58
A_093	506.767	42.8623	0.141179	0.690384	0.0257054	0.08458	0.00294	0.933567	11.8231	0.410972	0.0592	0.00158	523.4	17.5	533.031	19.8466	574.5	57.54	91.1053	523.4	17.5
A_101	198.718	16.8374	1.20991	0.676421	0.0263512	0.08473	0.00298	0.902809	11.8022	0.41509	0.0579	0.00194	524.3	17.7	524.609	20.4371	525.5	73.1	99.7716	524.3	17.7
A_046	130.642	11.3162	0.572555	0.696287	0.0276097	0.08662	0.00306	0.8909	11.5447	0.407836	0.0583	0.0021	535.5	18.12	536.571	21.2765	540.2	79.16	99.13	535.5	18.12
A_128	499.906	45.2915	0.283029	0.736649	0.0275233	0.0906	0.00316	0.933509	11.0375	0.384973	0.05897	0.00158	559.1	18.66	560.448	20.94	566	57.4	98.7809	559.1	18.66
A_007	125.199	11.4933	0.359589	0.757924	0.0446043	0.0918	0.00368	0.681168	10.8932	0.436679	0.05988	0.00516	566.2	21.72	572.812	33.7103	599.2	181.6	94.4927	566.2	21.72
A_043	41.8077	3.84046	0.615309	0.747527	0.0381647	0.09186	0.00348	0.742024	10.8861	0.412407	0.05902	0.00404	566.6	20.56	566.789	28.9372	567.8	145.5	99.7887	566.6	20.56
A_027	768.837	72.263	1.4825	0.782744	0.0290153	0.09399	0.00326	0.935682	10.6394	0.369024	0.0604	0.00158	579.1	19.26	587.048	21.7611	618.1	55.82	93.6903	579.1	19.26
A_068	30.2093	2.91006	0.543265	0.800771	0.0641215	0.09633	0.00448	0.580793	10.381	0.482786	0.06029	0.00786	592.9	26.3	597.263	47.8257	614.1	269.44	96.5478	592.9	26.3
A_120	211.996	20.994	0.646853	0.821167	0.033887	0.09903	0.00354	0.866233	10.098	0.360969	0.06014	0.00248	608.7	20.72	608.699	25.1191	608.8	88.18	99.9836	608.7	20.72
A_034	130.969	15.3103	0.608024	1.0148	0.0392054	0.1169	0.0041	0.907828	8.55432	0.300023	0.06296	0.00204	712.7	23.68	711.296	27.48	706.8	68.02	100.835	712.7	23.68
A_127	238.28	41.4917	0.782276	1.79083	0.0701013	0.17413	0.00616	0.903725	5.74284	0.203158	0.07459	0.0025	1034.8	33.78	1042.13	40.7936	1057.1	67.58	97.8905	1034.8	33.78
A_026	130.123	23.1371	0.255021	1.82525	0.069311	0.17781	0.00622	0.921201	5.62398	0.196733	0.07445	0.0022	1055	34.1	1054.57	40.0458	1053.5	59.66	100.142	1055	34.1
A_059	66.8755	12.4295	0.461392	1.97707	0.0795029	0.18586	0.00662	0.885752	5.38039	0.19164	0.07715	0.00288	1098.9	36	1107.72	44.5442	1125.2	73.42	97.6626	1098.9	36
A_112	471.21	88.9125	0.392913	2.02591	0.0749056	0.18869	0.00656	0.940289	5.2997	0.184249	0.07787	0.00196	1114.3	35.6	1124.24	41.5676	1143.5	49.7	97.4464	1114.3	35.6
A_116	122.735	23.4337	0.560713	2.06418	0.0776136	0.19093	0.00668	0.930489	5.23752	0.183243	0.07841	0.00216	1126.4	36.12	1137	42.7517	1157.3	54.34	97.33	1126.4	36.12
A_056	183.07	36.5023	0.39189	2.19303	0.083026	0.19939	0.00698	0.92466	5.0153	0.175569	0.07977	0.0023	1172	37.54	1178.83	44.6294	1191.3	56.36	98.3799	1172	37.54
A_028	309.466	62.5337	0.411655	2.21554	0.0808289	0.20207	0.007	0.949531	4.94878	0.171433	0.07952	0.00182	1186.5	37.56	1185.96	43.2671	1185.1	45.06	100.118	1186.5	37.56
A_008	158.223	31.9974	0.26078	2.25048	0.0886051	0.20223	0.00716	0.899255	4.94486	0.175074	0.08071	0.00278	1187.3	38.42	1196.93	47.1254	1214.5	66.8	97.7604	1187.3	38.42
A_134	73.5984	14.9515	0.318297	2.24307	0.0966415	0.20315	0.00742	0.847746	4.92247	0.179792	0.08008	0.00366	1192.2	39.72	1194.62	51.4696	1199	88.72	99.4329	1192.2	39.72
A_010	484.067	98.8125	0.215836	2.25164	0.0830311	0.20413	0.0071	0.943211	4.89884	0.17039	0.08	0.00196	1197.5	37.98	1197.3	44.1514	1197.1	48.14	100.033	1197.5	37.98
A_039	231.42	48.0473	0.14124	2.3096	0.0909063	0.20762	0.00736	0.90064	4.81649	0.170742	0.08068	0.00276	1216.1	39.28	1215.24	47.832	1213.7	66.76	100.198	1216.1	39.28
A_067	402.124	83.6337	0.237861	2.35633	0.0871821	0.20798	0.00724	0.940861	4.80815	0.167377	0.08217	0.00206	1218.1	38.62	1229.47	45.4895	1249.6	48.88	97.4792	1218.1	38.62
A_022	155.814	33.0996	0.219167	2.37804	0.0926794	0.21243	0.0075	0.905903	4.70743	0.166199	0.08119	0.00268	1241.7	39.9	1236.02	48.1715	1226	63.96	101.281	1241.7	39.9
A_044	67.936	16.0234	0.209183	2.85464	0.107093	0.23586	0.00824	0.931243	4.2398	0.148122	0.08778	0.0024	1365.2	43.02	1370.03	51.3974	1377.7	52.2	99.0927	1377.7	52.2
A_123	360.007	90.9451	0.257362	3.24488	0.120039	0.25262	0.0088	0.941651	3.95851	0.137895	0.09316	0.00232	1452	45.24	1467.95	54.3047	1491.1	46.7	97.3778	1491.1	46.7
A_015	630.011	160.502	0.353792	3.24532	0.117718	0.25476	0.00882	0.954443	3.92526	0.135896	0.09239	0.002	1463	45.28	1468.06	53.2513	1475.4	41.12	99.1595	1475.4	41.12
A_064	222.487	57.5128	0.79602	3.33752	0.122506	0.2585	0.00898	0.946418	3.86847	0.134386	0.09364	0.00222	1482.2	45.98	1489.87	54.6868	1500.9	44.38	98.7541	1500.9	44.38
A_125	190.196	49.2494	0.47195	3.30499	0.122471	0.25894	0.00902	0.940035	3.8619	0.134527	0.09257	0.00234	1484.4	46.16	1482.23	54.9262	1478.9	47.64	100.372	1478.9	47.64
A_025	344.335	89.8474	0.390054	3.36169	0.12244	0.26093	0.00904	0.951216	3.83245	0.132776	0.09344	0.0021	1494.6	46.22	1495.52	54.4699	1496.8	42.24	99.853	1496.8	42.24
A_040	127.695	33.7256	0.332857	3.44345	0.127414	0.26411	0.0092	0.941415	3.7863	0.131892	0.09456	0.00236	1510.8	46.9	1514.37	56.0344	1519.4	46.72	99.434	1519.4	46.72
A_061	132.644	35.2423	0.406542	3.55856	0.13109	0.26569	0.00924	0.944067	3.76378	0.130895	0.09714	0.00236	1518.9	47.08	1540.34	56.7429	1569.8	45.32	96.7575	1569.8	45.32
A_095	244.329	65.0185	0.520358	3.51062	0.130352	0.26611	0.00928	0.939188	3.75784	0.131047	0.09568	0.00244	1521	47.22	1529.61	56.7956	1541.6	47.5	98.6637	1541.6	47.5
A_024	403.921	123.895	0.240162	4.53835	0.165933	0.30673	0.01064	0.948745	3.2602	0.113091	0.10731	0.00248	1724.6	52.54	1738.03	63.5466	1754.2	42	98.3126	1754.2	42
A_029	532.413	167.726	0.36186	4.74108	0.172541	0.31503	0.01092	0.952477	3.1743	0.110032	0.10915	0.00242	1765.4	53.5	1774.53	64.5803	1785.3	40.18	98.8853	1785.3	40.18
A_038	164.524	51.835	0.354042	4.69809	0.172072	0.31506	0.01094	0.948059	3.174	0.110212	0.10815	0.00252	1765.6	53.64	1766.9	64.7143	1768.4	42.3	99.8417	1768.4	42.3
A_100	206.925	66.9691	0.186662	4.95231	0.1818	0.32364	0.01124	0.946058	3.08985	0.10731	0.11098	0.00264	1807.5	54.78	1811.22	66.4902	1815.5	43	99.5594	1815.5	43
A_133	98.7819	31.9718	1.68416	4.94593	0.185769	0.32366	0.01134	0.932822	3.08966	0.108252	0.11083	0.003	1807.6	55.18	1810.13	67.9884	1813.1	48.82	99.6967	1813.1	48.82
A_084	84.7003	40.3868	0.671073	11.1009	0.409087	0.47682	0.01662	0.94584	2.09723	0.0731008	0.16885	0.00404	2513.4	72.52	2531.63	93.2952	2546.3	39.72	98.7079	2546.3	39.72
A_096	226.474	109.475	0.382217	11.3578	0.415134	0.48339	0.01678	0.949729	2.06872	0.0718119	0.17041	0.0039	2542	72.92	2552.96	93.3124	2561.6	38.1	99.2349	2561.6	38.1
A_013	42.2393	20.6005	0.607589	11.6442	0.429538	0.48771	0.01702	0.946035	2.0504	0.0715544	0.17316	0.00414	2560.8	73.78	2576.23	95.0332	2588.5	39.58	98.9299	2588.5	39.58
A_031	150.194	78.1399	0.236286	13.3582	0.485761	0.52026	0.01804	0.953545	1.92212	0.0666493	0.18622	0.00408	2700.3	76.48	2705.31	98.3765	2709	35.94	99.6788	2709	35.94
A_090	98.1626	51.3724	1.01114	13.7476	0.504217	0.52334	0.0182	0.94819	1.9108	0.0664513	0.19052	0.00444	2713.3	77.02	2732.47	100.219	2746.6	38	98.7876	2746.6	38
A_137	326.656	184.832	0.0077312	16.4584	0.60496	0.56583	0.01966	0.945276	1.76732	0.0614061	0.21096	0.00506	2890.7	80.96	2903.81	106.735	2913	38.66	99.2345	2913	38.66

## Sheet: PlotDat1
Source sheet	Sheet3	0	0	300	0	0	0
Plot name	ProbDens1	1.75	0	350	0	3498.25	0
Plot Type	16	3.5	0	350	1
1st free col	9	5.25	0	300	1
Sigma Level	2	7	0	300	0
Absolute Errs	TRUE	8.75	0	ErrBox	ErrBox
Symbol Type	1	10.5	0	350	0
Inverse Plot	FALSE	12.25	0	400	0
Color Plot	TRUE	14	0	400	3
3D plot	FALSE	15.75	0	350	3
Linear	FALSE	17.5	0	350	0
Data Range	C2:D659	19.25	0	ErrBox	ErrBox
Filled Symbols	FALSE	21	0	400	0
ConcAge	FALSE	22.75	0	450	0
ConcSwap	FALSE	24.5	0	450	23
1st Symbol-row	1	26.25	0	400	23
		28	0	400	0
		29.75	0	ErrBox	ErrBox
		31.5	0	450	0
		33.25	0	500	0
		35	0	500	5
		36.75	0	450	5
		38.5	0	450	0
		40.25	0	ErrBox	ErrBox
		42	0	500	0
		43.75	0	550	0
		45.5	0	550	4
		47.25	0	500	4
		49	0	500	0
		50.75	0	ErrBox	ErrBox
		52.5	0	550	0
		54.25	0	600	0
		56	0	600	6
		57.75	0	550	6
		59.5	0	550	0
		61.25	0	ErrBox	ErrBox
		63	0	600	0
		64.75	0	650	0
		66.5	0	650	2
		68.25	0	600	2
		70	0	600	0
		71.75	0	ErrBox	ErrBox
		73.5	0	650	0
		75.25	0	700	0
		77	0	700	2
		78.75	0	650	2
		80.5	0	650	0
		82.25	0	ErrBox	ErrBox
		84	0	800	0
		85.75	0	850	0
		87.5	0	850	4
		89.25	0	800	4
		91	0	800	0
		92.75	0	ErrBox	ErrBox
		94.5	0	850	0
		96.25	0	900	0
		98	0	900	2
		99.75	0	850	2
		101.5	0	850	0
		103.25	0	ErrBox	ErrBox
		105	0	900	0
		106.75	0	950	0
		108.5	0	950	6
		110.25	0	900	6
		112	0	900	0
		113.75	0	ErrBox	ErrBox
		115.5	0	950	0
		117.25	0	1000	0
		119	0	1000	17
		120.75	0	950	17
		122.5	0	950	0
		124.25	0	ErrBox	ErrBox
		126	0	1000	0
		127.75	0	1050	0
		129.5	0	1050	33
		131.25	0	1000	33
		133	0	1000	0
		134.75	0	ErrBox	ErrBox
		136.5	0	1050	0
		138.25	0	1100	0
		140	0	1100	24
		141.75	0	1050	24
		143.5	0	1050	0
		145.25	0	ErrBox	ErrBox
		147	0	1100	0
		148.75	0	1150	0
		150.5	0	1150	29
		152.25	0	1100	29
		154	0	1100	0
		155.75	0	ErrBox	ErrBox
		157.5	0	1150	0
		159.25	0	1200	0
		161	0	1200	24
		162.75	0	1150	24
		164.5	0	1150	0
		166.25	0	ErrBox	ErrBox
		168	0	1200	0
		169.75	0	1250	0
		171.5	0	1250	9
		173.25	0	1200	9
		175	0	1200	0
		176.75	0	ErrBox	ErrBox
		178.5	0	1250	0
		180.25	0	1300	0
		182	0	1300	10
		183.75	0	1250	10
		185.5	0	1250	0
		187.25	0	ErrBox	ErrBox
		189	0	1300	0
		190.75	0	1350	0
		192.5	0	1350	13
		194.25	0	1300	13
		196	0	1300	0
		197.75	0	ErrBox	ErrBox
		199.5	0	1350	0
		201.25	0	1400	0
		203	0	1400	23
		204.75	0	1350	23
		206.5	0	1350	0
		208.25	0	ErrBox	ErrBox
		210	0	1400	0
		211.75	0	1450	0
		213.5	0	1450	18
		215.25	0	1400	18
		217	0	1400	0
		218.75	0	ErrBox	ErrBox
		220.5	0	1450	0
		222.25	0	1500	0
		224	0	1500	46
		225.75	0	1450	46
		227.5	0	1450	0
		229.25	0	ErrBox	ErrBox
		231	0	1500	0
		232.75	0	1550	0
		234.5	0	1550	24
		236.25	0	1500	24
		238	0	1500	0
		239.75	0	ErrBox	ErrBox
		241.5	0	1550	0
		243.25	0	1600	0
		245	0	1600	34
		246.75	0	1550	34
		248.5	0	1550	0
		250.25	0	ErrBox	ErrBox
		252	0	1600	0
		253.75	0	1650	0
		255.5	0	1650	86
		257.25	0	1600	86
		259	0	1600	0
		260.75	0	ErrBox	ErrBox
		262.5	0	1650	0
		264.25	0	1700	0
		266	0	1700	45
		267.75	0	1650	45
		269.5	0	1650	0
		271.25	0	ErrBox	ErrBox
		273	0	1700	0
		274.75	0	1750	0
		276.5	0	1750	30
		278.25	0	1700	30
		280	0	1700	0
		281.75	0	ErrBox	ErrBox
		283.5	0	1750	0
		285.25	0	1800	0
		287	0	1800	42
		288.75	0	1750	42
		290.5	0	1750	0
		292.25	0	ErrBox	ErrBox
		294	0	1800	0
		295.75	0	1850	0
		297.5	0	1850	17
		299.25	2.75924e-09	1800	17
		301	1.12601e-08	1800	0
		302.75	4.15722e-08	ErrBox	ErrBox
		304.5	1.38858e-07	1850	0
		306.25	4.19613e-07	1900	0
		308	1.14719e-06	1900	6
		309.75	2.83744e-06	1850	6
		311.5	6.34932e-06	1850	0
		313.25	1.28539e-05	ErrBox	ErrBox
		315	2.35425e-05	1900	0
		316.75	3.901e-05	1950	0
		318.5	5.84802e-05	1950	3
		320.25	7.93138e-05	1900	3
		322	9.73188e-05	1900	0
		323.75	0.000108032	ErrBox	ErrBox
		325.5	0.000108497	1950	0
		327.25	9.858e-05	2000	0
		329	8.10342e-05	2000	6
		330.75	6.02637e-05	1950	6
		332.5	4.05463e-05	1950	0
		334.25	2.46806e-05	ErrBox	ErrBox
		336	1.35915e-05	2000	0
		337.75	6.78415e-06	2050	0
		339.5	3.138e-06	2050	2
		341.25	1.71378e-06	2000	2
		343	2.52701e-06	2000	0
		344.75	7.48582e-06	ErrBox	ErrBox
		346.5	2.09808e-05	2050	0
		348.25	4.81517e-05	2100	0
		350	8.9172e-05	2100	1
		351.75	0.0001331	2050	1
		353.5	0.000160269	2050	0
		355.25	0.000156161	ErrBox	ErrBox
		357	0.000124334	2100	0
		358.75	8.35901e-05	2150	0
		360.5	5.27095e-05	2150	2
		362.25	3.93859e-05	2100	2
		364	4.11573e-05	2100	0
		365.75	5.19296e-05	ErrBox	ErrBox
		367.5	6.62591e-05	2150	0
		369.25	8.01317e-05	2200	0
		371	9.05382e-05	2200	1
		372.75	9.53996e-05	2150	1
		374.5	9.38637e-05	2150	0
		376.25	8.65145e-05	ErrBox	ErrBox
		378	7.52176e-05	2300	0
		379.75	6.26243e-05	2350	0
		381.5	5.15356e-05	2350	1
		383.25	4.44801e-05	2300	1
		385	4.35385e-05	2300	0
		386.75	5.04773e-05	ErrBox	ErrBox
		388.5	6.69161e-05	2400	0
		390.25	9.43734e-05	2450	0
		392	0.000134099	2450	3
		393.75	0.000186693	2400	3
		395.5	0.000251703	2400	0
		397.25	0.000327371	ErrBox	ErrBox
		399	0.000410611	2450	0
		400.75	0.000497204	2500	0
		402.5	0.000582096	2500	5
		404.25	0.000659971	2450	5
		406	0.000726469	2450	0
		407.75	0.000780613	ErrBox	ErrBox
		409.5	0.000826757	2550	0
		411.25	0.000870282	2600	0
		413	0.000904674	2600	1
		414.75	0.000905126	2550	1
		416.5	0.000848256	2550	0
		418.25	0.000741541	ErrBox	ErrBox
		420	0.000621765	2600	0
		421.75	0.000523496	2650	0
		423.5	0.000458791	2650	5
		425.25	0.000423476	2600	5
		427	0.000410134	2600	0
		428.75	0.000413334	ErrBox	ErrBox
		430.5	0.000430144	2650	0
		432.25	0.000461763	2700	0
		434	0.000516256	2700	17
		435.75	0.000606335	2650	17
		437.5	0.000735573	2650	0
		439.25	0.000878406	ErrBox	ErrBox
		441	0.000977008	2700	0
		442.75	0.000972759	2750	0
		444.5	0.000851651	2750	4
		446.25	0.00065794	2700	4
		448	0.000461288	2700	0
		449.75	0.000312856	ErrBox	ErrBox
		451.5	0.000229386	2750	0
		453.25	0.00020559	2800	0
		455	0.000228992	2800	11
		456.75	0.000281858	2750	11
		458.5	0.000338196	2750	0
		460.25	0.000370068	ErrBox	ErrBox
		462	0.000362395	2800	0
		463.75	0.000321432	2850	0
		465.5	0.000268495	2850	3
		467.25	0.000226109	2800	3
		469	0.000207235	2800	0
		470.75	0.00021112	ErrBox	ErrBox
		472.5	0.000225148	2850	0
		474.25	0.000232077	2900	0
		476	0.00021975	2900	1
		477.75	0.000187384	2850	1
		479.5	0.00014405	2850	0
		481.25	0.000101445	ErrBox	ErrBox
		483	6.72474e-05	2950	0
		484.75	4.32958e-05	3000	0
		486.5	2.77834e-05	3000	1
		488.25	1.81678e-05	2950	1
		490	1.29149e-05	2950	0
		491.75	1.2113e-05	ErrBox	ErrBox
		493.5	1.7571e-05	3050	0
		495.25	3.2262e-05	3100	0
		497	5.83592e-05	3100	2
		498.75	9.4034e-05	3050	2
		500.5	0.000131376	3050	0
		502.25	0.000158687	ErrBox	ErrBox
		504	0.000167191	3400	0
		505.75	0.000157092	3450	0
		507.5	0.000137384	3450	1
		509.25	0.000119513	3400	1
		511	0.000110659	3400	0
		512.75	0.000111593	ErrBox	ErrBox
		514.5	0.000118909
		516.25	0.000128339
		518	0.000136708
		519.75	0.000142322
		521.5	0.000144638
		523.25	0.00014383
		525	0.000140469
		526.75	0.000135279
		528.5	0.00012895
		530.25	0.000122004
		532	0.000114731
		533.75	0.000107203
		535.5	9.93481e-05
		537.25	9.10614e-05
		539	8.23133e-05
		540.75	7.32386e-05
		542.5	6.41828e-05
		544.25	5.57263e-05
		546	4.87067e-05
		547.75	4.42572e-05
		549.5	4.38107e-05
		551.25	4.89987e-05
		553	6.12747e-05
		554.75	8.12536e-05
		556.5	0.000107995
		558.25	0.00013873
		560	0.00016948
		561.75	0.000196537
		563.5	0.00021802
		565.25	0.000234499
		567	0.000248251
		568.75	0.000261649
		570.5	0.000275713
		572.25	0.000289383
		574	0.000299503
		575.75	0.00030149
		577.5	0.000290884
		579.25	0.000265648
		581	0.000228042
		582.75	0.000184521
		584.5	0.00014339
		586.25	0.000111643
		588	9.28921e-05
		589.75	8.70881e-05
		591.5	9.13837e-05
		593.25	0.00010125
		595	0.000111564
		596.75	0.000117837
		598.5	0.0001175
		600.25	0.00011082
		602	0.000100744
		603.75	9.16059e-05
		605.5	8.71503e-05
		607.25	8.88507e-05
		609	9.52638e-05
		610.75	0.000102706
		612.5	0.000106886
		614.25	0.000104711
		616	9.5443e-05
		617.75	8.07714e-05
		619.5	6.38887e-05
		621.25	4.81664e-05
		623	3.60777e-05
		624.75	2.87634e-05
		626.5	2.61886e-05
		628.25	2.76348e-05
		630	3.21697e-05
		631.75	3.89411e-05
		633.5	4.72679e-05
		635.25	5.66094e-05
		637	6.64966e-05
		638.75	7.64797e-05
		640.5	8.61095e-05
		642.25	9.49485e-05
		644	0.000102603
		645.75	0.000108751
		647.5	0.000113178
		649.25	0.000115795
		651	0.000116636
		652.75	0.000115847
		654.5	0.00011366
		656.25	0.000110352
		658	0.000106212
		659.75	0.000101504
		661.5	9.64395e-05
		663.25	9.11688e-05
		665	8.57776e-05
		666.75	8.02989e-05
		668.5	7.4731e-05
		670.25	6.90582e-05
		672	6.32711e-05
		673.75	5.73811e-05
		675.5	5.14284e-05
		677.25	4.54825e-05
		679	3.96365e-05
		680.75	3.39964e-05
		682.5	2.86691e-05
		684.25	2.37503e-05
		686	1.93149e-05
		687.75	1.54114e-05
		689.5	1.20592e-05
		691.25	9.25219e-06
		693	6.95659e-06
		694.75	5.1256e-06
		696.5	3.69903e-06
		698.25	2.61731e-06
		700	1.81526e-06
		701.75	1.23505e-06
		703.5	8.25712e-07
		705.25	5.44401e-07
		707	3.55602e-07
		708.75	2.34833e-07
		710.5	1.60372e-07
		712.25	1.17838e-07
		714	9.72275e-08
		715.75	9.18751e-08
		717.5	9.75812e-08
		719.25	1.11915e-07
		721	1.33689e-07
		722.75	1.62585e-07
		724.5	1.97742e-07
		726.25	2.42739e-07
		728	2.96636e-07
		729.75	3.6087e-07
		731.5	4.3704e-07
		733.25	5.26907e-07
		735	6.32398e-07
		736.75	7.55596e-07
		738.5	8.98736e-07
		740.25	1.06419e-06
		742	1.25443e-06
		743.75	1.47203e-06
		745.5	1.71962e-06
		747.25	1.99981e-06
		749	2.31521e-06
		750.75	2.66829e-06
		752.5	3.06318e-06
		754.25	3.4999e-06
		756	3.98168e-06
		757.75	4.51072e-06
		759.5	5.0892e-06
		761.25	5.71947e-06
		763	6.4043e-06
		764.75	7.14717e-06
		766.5	7.9528e-06
		768.25	8.82772e-06
		770	9.781e-06
		771.75	1.0825e-05
		773.5	1.1976e-05
		775.25	1.3255e-05
		777	1.46879e-05
		778.75	1.63053e-05
		780.5	1.81414e-05
		782.25	2.0235e-05
		784	2.26239e-05
		785.75	2.53433e-05
		787.5	2.84321e-05
		789.25	3.19344e-05
		791	3.59156e-05
		792.75	4.04879e-05
		794.5	4.58449e-05
		796.25	5.2291e-05
		798	6.0242e-05
		799.75	7.01603e-05
		801.5	8.24006e-05
		803.25	9.69753e-05
		805	0.000113304
		806.75	0.000130065
		808.5	0.000145281
		810.25	0.000156684
		812	0.000162299
		813.75	0.00016104
		815.5	0.000153071
		817.25	0.000139786
		819	0.000123395
		820.75	0.000106308
		822.5	9.0554e-05
		824.25	7.74326e-05
		826	6.74521e-05
		827.75	6.0498e-05
		829.5	5.60954e-05
		831.25	5.36502e-05
		833	5.26254e-05
		834.75	5.26243e-05
		836.5	5.34257e-05
		838.25	5.49906e-05
		840	5.74558e-05
		841.75	6.11033e-05
		843.5	6.62856e-05
		845.25	7.32904e-05
		847	8.21571e-05
		848.75	9.24825e-05
		850.5	0.000103314
		852.25	0.000113196
		854	0.000120419
		855.75	0.000123425
		857.5	0.00012124
		859.25	0.00011379
		861	0.000101949
		862.75	8.73144e-05
		864.5	7.17937e-05
		866.25	5.71521e-05
		868	4.4678e-05
		869.75	3.50436e-05
		871.5	2.83582e-05
		873.25	2.43292e-05
		875	2.24665e-05
		876.75	2.22426e-05
		878.5	2.31906e-05
		880.25	2.49424e-05
		882	2.72206e-05
		883.75	2.9823e-05
		885.5	3.25963e-05
		887.25	3.54199e-05
		889	3.81961e-05
		890.75	4.08495e-05
		892.5	4.33245e-05
		894.25	4.55926e-05
		896	4.76591e-05
		897.75	4.95592e-05
		899.5	5.13724e-05
		901.25	5.32122e-05
		903	5.52331e-05
		904.75	5.7628e-05
		906.5	6.06353e-05
		908.25	6.45594e-05
		910	6.98059e-05
		911.75	7.69228e-05
		913.5	8.66008e-05
		915.25	9.95621e-05
		917	0.000116294
		918.75	0.000136648
		920.5	0.000159423
		922.25	0.000182245
		924	0.000201954
		925.75	0.000215584
		927.5	0.000221591
		929.25	0.00022079
		931	0.000216481
		932.75	0.000213626
		934.5	0.00021732
		936.25	0.000231207
		938	0.000256396
		939.75	0.000291188
		941.5	0.000331644
		943.25	0.000372755
		945	0.000409765
		946.75	0.000439277
		948.5	0.000459768
		950.25	0.000471529
		952	0.000476191
		953.75	0.000476173
		955.5	0.000474301
		957.25	0.000473582
		959	0.000476973
		960.75	0.000486939
		962.5	0.000504774
		964.25	0.000529939
		966	0.000559734
		967.75	0.000589709
		969.5	0.000614789
		971.25	0.000630791
		973	0.000635713
		974.75	0.00063022
		976.5	0.000617198
		978.25	0.000600643
		980	0.000584446
		981.75	0.000571603
		983.5	0.000563954
		985.25	0.000562343
		987	0.000566975
		988.75	0.000577668
		990.5	0.000593983
		992.25	0.000615235
		994	0.000640466
		995.75	0.000668431
		997.5	0.00069765
		999.25	0.000726495
		1001	0.000753364
		1002.75	0.000776855
		1004.5	0.000795944
		1006.25	0.000810146
		1008	0.000819581
		1009.75	0.000824966
		1011.5	0.000827507
		1013.25	0.000828701
		1015	0.000830097
		1016.75	0.000833087
		1018.5	0.000838705
		1020.25	0.000847508
		1022	0.00085958
		1023.75	0.000874573
		1025.5	0.000891825
		1027.25	0.000910507
		1029	0.000929763
		1030.75	0.000948817
		1032.5	0.000967023
		1034.25	0.000983855
		1036	0.000998832
		1037.75	0.00101142
		1039.5	0.00102096
		1041.25	0.00102663
		1043	0.00102758
		1044.75	0.00102307
		1046.5	0.00101275
		1048.25	0.000996778
		1050	0.000975994
		1051.75	0.000951771
		1053.5	0.000925833
		1055.25	0.000899953
		1057	0.000875682
		1058.75	0.000854144
		1060.5	0.000835937
		1062.25	0.000821196
		1064	0.000809657
		1065.75	0.000800807
		1067.5	0.000794016
		1069.25	0.000788626
		1071	0.000784037
		1072.75	0.000779737
		1074.5	0.000775335
		1076.25	0.000770573
		1078	0.000765291
		1079.75	0.000759451
		1081.5	0.000753129
		1083.25	0.000746504
		1085	0.000739864
		1086.75	0.000733597
		1088.5	0.000728163
		1090.25	0.000724037
		1092	0.000721653
		1093.75	0.000721317
		1095.5	0.000723136
		1097.25	0.000726983
		1099	0.000732509
		1100.75	0.000739185
		1102.5	0.000746401
		1104.25	0.000753583
		1106	0.000760293
		1107.75	0.000766308
		1109.5	0.000771645
		1111.25	0.000776512
		1113	0.000781248
		1114.75	0.000786213
		1116.5	0.000791669
		1118.25	0.000797745
		1120	0.000804397
		1121.75	0.000811428
		1123.5	0.000818538
		1125.25	0.000825415
		1127	0.000831776
		1128.75	0.000837414
		1130.5	0.000842163
		1132.25	0.000845929
		1134	0.000848621
		1135.75	0.000850143
		1137.5	0.000850416
		1139.25	0.000849373
		1141	0.000847016
		1142.75	0.000843419
		1144.5	0.000838743
		1146.25	0.000833196
		1148	0.000827016
		1149.75	0.000820426
		1151.5	0.000813646
		1153.25	0.000806926
		1155	0.000800598
		1156.75	0.000795127
		1158.5	0.00079111
		1160.25	0.000789223
		1162	0.000790084
		1163.75	0.000794088
		1165.5	0.000801241
		1167.25	0.000811053
		1169	0.000822527
		1170.75	0.000834241
		1172.5	0.00084453
		1174.25	0.00085168
		1176	0.00085416
		1177.75	0.000850788
		1179.5	0.000840836
		1181.25	0.000824066
		1183	0.000800705
		1184.75	0.000771383
		1186.5	0.00073704
		1188.25	0.000698842
		1190	0.000658069
		1191.75	0.000616037
		1193.5	0.000574002
		1195.25	0.000533092
		1197	0.000494243
		1198.75	0.000458165
		1200.5	0.000425316
		1202.25	0.000395913
		1204	0.000369963
		1205.75	0.000347291
		1207.5	0.000327611
		1209.25	0.000310581
		1211	0.000295861
		1212.75	0.000283158
		1214.5	0.000272291
		1216.25	0.000263178
		1218	0.000255853
		1219.75	0.000250443
		1221.5	0.00024711
		1223.25	0.000245996
		1225	0.000247176
		1226.75	0.000250591
		1228.5	0.000256035
		1230.25	0.000263158
		1232	0.000271482
		1233.75	0.000280443
		1235.5	0.000289463
		1237.25	0.000297994
		1239	0.000305561
		1240.75	0.000311799
		1242.5	0.000316465
		1244.25	0.000319463
		1246	0.000320842
		1247.75	0.000320794
		1249.5	0.000319663
		1251.25	0.000317896
		1253	0.000316013
		1254.75	0.000314549
		1256.5	0.000313977
		1258.25	0.000314661
		1260	0.000316819
		1261.75	0.000320499
		1263.5	0.000325604
		1265.25	0.000331912
		1267	0.000339099
		1268.75	0.00034677
		1270.5	0.000354464
		1272.25	0.000361659
		1274	0.000367781
		1275.75	0.000372238
		1277.5	0.000374461
		1279.25	0.000373978
		1281	0.000370486
		1282.75	0.0003639
		1284.5	0.000354415
		1286.25	0.00034249
		1288	0.000328807
		1289.75	0.00031421
		1291.5	0.000299601
		1293.25	0.000285851
		1295	0.000273721
		1296.75	0.000263811
		1298.5	0.000256527
		1300.25	0.000252087
		1302	0.000250542
		1303.75	0.000251829
		1305.5	0.000255793
		1307.25	0.000262248
		1309	0.000270991
		1310.75	0.000281845
		1312.5	0.000294654
		1314.25	0.000309287
		1316	0.000325617
		1317.75	0.000343504
		1319.5	0.000362748
		1321.25	0.000383087
		1323	0.000404189
		1324.75	0.000425703
		1326.5	0.000447305
		1328.25	0.000468798
		1330	0.000490165
		1331.75	0.000511629
		1333.5	0.000533609
		1335.25	0.000556672
		1337	0.00058141
		1338.75	0.000608297
		1340.5	0.000637571
		1342.25	0.000669121
		1344	0.000702449
		1345.75	0.000736667
		1347.5	0.000770551
		1349.25	0.000802615
		1351	0.000831228
		1352.75	0.000854737
		1354.5	0.000871619
		1356.25	0.000880598
		1358	0.000880814
		1359.75	0.000871918
		1361.5	0.000854151
		1363.25	0.000828354
		1365	0.000795893
		1366.75	0.000758517
		1368.5	0.000718156
		1370.25	0.000676712
		1372	0.000635851
		1373.75	0.000596907
		1375.5	0.000560826
		1377.25	0.000528227
		1379	0.000499487
		1380.75	0.000474889
		1382.5	0.000454691
		1384.25	0.000439209
		1386	0.000428784
		1387.75	0.000423701
		1389.5	0.000424094
		1391.25	0.000429807
		1393	0.000440312
		1394.75	0.000454657
		1396.5	0.000471486
		1398.25	0.000489146
		1400	0.000505856
		1401.75	0.000519931
		1403.5	0.000530008
		1405.25	0.000535268
		1407	0.000535576
		1408.75	0.000531509
		1410.5	0.000524262
		1412.25	0.000515461
		1414	0.000506911
		1415.75	0.000500338
		1417.5	0.000497198
		1419.25	0.000498527
		1421	0.000504862
		1422.75	0.000516228
		1424.5	0.000532143
		1426.25	0.000551668
		1428	0.000573544
		1429.75	0.000596386
		1431.5	0.000618969
		1433.25	0.00064057
		1435	0.000661237
		1436.75	0.000681952
		1438.5	0.000704498
		1440.25	0.000731095
		1442	0.000763721
		1443.75	0.000803444
		1445.5	0.000849854
		1447.25	0.000900951
		1449	0.000953524
		1450.75	0.001004
		1452.5	0.00104953
		1454.25	0.0010888
		1456	0.00112241
		1457.75	0.00115259
		1459.5	0.00118241
		1461.25	0.00121461
		1463	0.00125077
		1464.75	0.00129063
		1466.5	0.00133213
		1468.25	0.00137183
		1470	0.00140579
		1471.75	0.00143045
		1473.5	0.00144343
		1475.25	0.00144393
		1477	0.0014327
		1478.75	0.00141168
		1480.5	0.00138341
		1482.25	0.00135041
		1484	0.00131484
		1485.75	0.00127822
		1487.5	0.00124142
		1489.25	0.00120485
		1491	0.00116856
		1492.75	0.00113254
		1494.5	0.00109685
		1496.25	0.00106173
		1498	0.00102766
		1499.75	0.000995209
		1501.5	0.000964981
		1503.25	0.000937373
		1505	0.000912471
		1506.75	0.000889977
		1508.5	0.000869267
		1510.25	0.000849558
		1512	0.000830124
		1513.75	0.000810533
		1515.5	0.000790834
		1517.25	0.000771639
		1519	0.000754076
		1520.75	0.000739614
		1522.5	0.000729774
		1524.25	0.000725788
		1526	0.000728287
		1527.75	0.00073705
		1529.5	0.000750917
		1531.25	0.000767914
		1533	0.000785483
		1534.75	0.000800908
		1536.5	0.000811725
		1538.25	0.000816115
		1540	0.000813149
		1541.75	0.000802897
		1543.5	0.000786331
		1545.25	0.000765144
		1547	0.000741474
		1548.75	0.000717624
		1550.5	0.000695778
		1552.25	0.000677831
		1554	0.00066522
		1555.75	0.000658859
		1557.5	0.000659143
		1559.25	0.00066594
		1561	0.000678705
		1562.75	0.000696577
		1564.5	0.000718519
		1566.25	0.000743517
		1568	0.000770747
		1569.75	0.000799773
		1571.5	0.000830658
		1573.25	0.000864077
		1575	0.000901274
		1576.75	0.000943944
		1578.5	0.000994026
		1580.25	0.00105335
		1582	0.00112321
		1583.75	0.00120405
		1585.5	0.00129514
		1587.25	0.00139454
		1589	0.00149937
		1590.75	0.00160631
		1592.5	0.00171232
		1594.25	0.00181527
		1596	0.00191429
		1597.75	0.00200986
		1599.5	0.00210329
		1601.25	0.00219606
		1603	0.00228897
		1604.75	0.00238149
		1606.5	0.00247149
		1608.25	0.00255543
		1610	0.00262902
		1611.75	0.002688
		1613.5	0.00272905
		1615.25	0.0027503
		1617	0.00275161
		1618.75	0.00273447
		1620.5	0.00270167
		1622.25	0.00265697
		1624	0.00260462
		1625.75	0.00254907
		1627.5	0.00249464
		1629.25	0.0024452
		1631	0.00240386
		1632.75	0.00237262
		1634.5	0.00235206
		1636.25	0.00234108
		1638	0.00233693
		1639.75	0.00233554
		1641.5	0.00233211
		1643.25	0.00232188
		1645	0.00230099
		1646.75	0.00226698
		1648.5	0.00221916
		1650.25	0.00215853
		1652	0.00208746
		1653.75	0.00200921
		1655.5	0.00192737
		1657.25	0.00184537
		1659	0.00176611
		1660.75	0.0016918
		1662.5	0.00162385
		1664.25	0.00156307
		1666	0.00150977
		1667.75	0.00146391
		1669.5	0.00142525
		1671.25	0.00139323
		1673	0.00136698
		1674.75	0.00134514
		1676.5	0.0013259
		1678.25	0.00130713
		1680	0.00128667
		1681.75	0.00126281
		1683.5	0.00123472
		1685.25	0.00120271
		1687	0.00116822
		1688.75	0.00113347
		1690.5	0.00110071
		1692.25	0.00107155
		1694	0.00104639
		1695.75	0.0010245
		1697.5	0.00100446
		1699.25	0.000985099
		1701	0.000966169
		1702.75	0.000948698
		1704.5	0.00093458
		1706.25	0.00092572
		1708	0.000923077
		1709.75	0.000926
		1711.5	0.000932189
		1713.25	0.000938287
		1715	0.000940869
		1716.75	0.000937484
		1718.5	0.000927443
		1720.25	0.000912098
		1722	0.000894614
		1723.75	0.000879285
		1725.5	0.000870608
		1727.25	0.000872325
		1729	0.000886562
		1730.75	0.000913333
		1732.5	0.000950458
		1734.25	0.000994052
		1736	0.0010394
		1737.75	0.0010821
		1739.5	0.00111897
		1741.25	0.00114856
		1743	0.00117101
		1744.75	0.00118757
		1746.5	0.00119983
		1748.25	0.00120939
		1750	0.00121766
		1751.75	0.00122605
		1753.5	0.00123607
		1755.25	0.00124921
		1757	0.00126644
		1758.75	0.00128753
		1760.5	0.00131064
		1762.25	0.00133244
		1764	0.00134893
		1765.75	0.00135667
		1767.5	0.00135378
		1769.25	0.00134034
		1771	0.0013181
		1772.75	0.00128968
		1774.5	0.00125792
		1776.25	0.00122537
		1778	0.00119424
		1779.75	0.0011664
		1781.5	0.00114333
		1783.25	0.00112596
		1785	0.00111452
		1786.75	0.00110844
		1788.5	0.00110641
		1790.25	0.0011066
		1792	0.00110692
		1793.75	0.00110537
		1795.5	0.00110015
		1797.25	0.00108984
		1799	0.0010734
		1800.75	0.00105008
		1802.5	0.00101938
		1804.25	0.000981027
		1806	0.000935039
		1807.75	0.000881854
		1809.5	0.000822496
		1811.25	0.000758625
		1813	0.000692508
		1814.75	0.000626791
		1816.5	0.000564225
		1818.25	0.000507267
		1820	0.00045782
		1821.75	0.000417044
		1823.5	0.000385318
		1825.25	0.000362336
		1827	0.000347263
		1828.75	0.000338939
		1830.5	0.000336086
		1832.25	0.00033744
		1834	0.000341824
		1835.75	0.000348109
		1837.5	0.000355076
		1839.25	0.000361263
		1841	0.000364897
		1842.75	0.000364048
		1844.5	0.000357012
		1846.25	0.00034289
		1848	0.000322057
		1849.75	0.000296321
		1851.5	0.000268597
		1853.25	0.000242189
		1855	0.000219929
		1856.75	0.000203517
		1858.5	0.000193246
		1860.25	0.000188198
		1862	0.000186717
		1863.75	0.000187016
		1865.5	0.000187642
		1867.25	0.000187782
		1869	0.000187285
		1870.75	0.00018651
		1872.5	0.000186025
		1874.25	0.000186305
		1876	0.000187498
		1877.75	0.000189339
		1879.5	0.000191281
		1881.25	0.000192697
		1883	0.000193148
		1884.75	0.000192536
		1886.5	0.000191064
		1888.25	0.000189018
		1890	0.000186519
		1891.75	0.000183326
		1893.5	0.000178881
		1895.25	0.000172545
		1897	0.000163941
		1898.75	0.00015322
		1900.5	0.000141123
		1902.25	0.000128785
		1904	0.000117393
		1905.75	0.000107828
		1907.5	0.00010046
		1909.25	9.51188e-05
		1911	9.12524e-05
		1912.75	8.81682e-05
		1914.5	8.52607e-05
		1916.25	8.21679e-05
		1918	7.88267e-05
		1919.75	7.54499e-05
		1921.5	7.24287e-05
		1923.25	7.02414e-05
		1925	6.93535e-05
		1926.75	7.01367e-05
		1928.5	7.28295e-05
		1930.25	7.75144e-05
		1932	8.41211e-05
		1933.75	9.24542e-05
		1935.5	0.000102243
		1937.25	0.000113178
		1939	0.000125005
		1940.75	0.000137555
		1942.5	0.000150796
		1944.25	0.000164811
		1946	0.000179755
		1947.75	0.000195763
		1949.5	0.00021286
		1951.25	0.000230889
		1953	0.000249483
		1954.75	0.000268089
		1956.5	0.000286
		1958.25	0.000302386
		1960	0.000316276
		1961.75	0.000326556
		1963.5	0.000331981
		1965.25	0.000331303
		1967	0.000323497
		1968.75	0.000308065
		1970.5	0.000285298
		1972.25	0.000256386
		1974	0.000223313
		1975.75	0.000188539
		1977.5	0.000154566
		1979.25	0.000123523
		1981	9.68701e-05
		1982.75	7.5299e-05
		1984.5	5.87975e-05
		1986.25	4.6852e-05
		1988	3.86739e-05
		1989.75	3.34189e-05
		1991.5	3.0338e-05
		1993.25	2.88753e-05
		1995	2.87069e-05
		1996.75	2.97419e-05
		1998.5	3.20831e-05
		2000.25	3.59768e-05
		2002	4.17156e-05
		2003.75	4.9512e-05
		2005.5	5.93561e-05
		2007.25	7.08812e-05
		2009	8.32962e-05
		2010.75	9.5434e-05
		2012.5	0.000105911
		2014.25	0.000113407
		2016	0.000116958
		2017.75	0.000116198
		2019.5	0.000111448
		2021.25	0.000103624
		2023	9.40033e-05
		2024.75	8.39275e-05
		2026.5	7.45288e-05
		2028.25	6.65612e-05
		2030	6.03571e-05
		2031.75	5.58894e-05
		2033.5	5.28929e-05
		2035.25	5.09946e-05
		2037	4.98175e-05
		2038.75	4.90423e-05
		2040.5	4.84321e-05
		2042.25	4.78294e-05
		2044	4.71407e-05
		2045.75	4.63179e-05
		2047.5	4.53422e-05
		2049.25	4.42142e-05
		2051	4.29378e-05
		2052.75	4.15324e-05
		2054.5	4.0012e-05
		2056.25	3.83956e-05
		2058	3.67033e-05
		2059.75	3.49553e-05
		2061.5	3.31725e-05
		2063.25	3.1376e-05
		2065	2.95874e-05
		2066.75	2.7829e-05
		2068.5	2.61241e-05
		2070.25	2.4497e-05
		2072	2.29739e-05
		2073.75	2.15823e-05
		2075.5	2.0352e-05
		2077.25	1.93141e-05
		2079	1.85012e-05
		2080.75	1.79461e-05
		2082.5	1.76793e-05
		2084.25	1.77326e-05
		2086	1.81281e-05
		2087.75	1.88817e-05
		2089.5	1.9999e-05
		2091.25	2.14721e-05
		2093	2.32777e-05
		2094.75	2.5375e-05
		2096.5	2.77096e-05
		2098.25	3.02038e-05
		2100	3.27731e-05
		2101.75	3.5325e-05
		2103.5	3.77702e-05
		2105.25	4.00357e-05
		2107	4.20814e-05
		2108.75	4.3919e-05
		2110.5	4.56301e-05
		2112.25	4.73781e-05
		2114	4.9405e-05
		2115.75	5.20064e-05
		2117.5	5.54767e-05
		2119.25	6.00293e-05
		2121	6.5701e-05
		2122.75	7.22691e-05
		2124.5	7.92102e-05
		2126.25	8.57295e-05
		2128	9.0872e-05
		2129.75	9.36988e-05
		2131.5	9.34954e-05
		2133.25	8.99336e-05
		2135	8.31653e-05
		2136.75	7.37961e-05
		2138.5	6.27567e-05
		2140.25	5.11097e-05
		2142	3.98498e-05
		2143.75	2.97476e-05
		2145.5	2.12703e-05
		2147.25	1.45804e-05
		2149	9.59519e-06
		2150.75	6.07503e-06
		2152.5	3.71172e-06
		2154.25	2.19773e-06
		2156	1.27272e-06
		2157.75	7.32763e-07
		2159.5	4.45511e-07
		2161.25	3.43613e-07
		2163	4.31098e-07
		2164.75	7.99959e-07
		2166.5	1.6661e-06
		2168.25	3.39555e-06
		2170	6.52011e-06
		2171.75	1.16884e-05
		2173.5	1.95061e-05
		2175.25	3.02853e-05
		2177	4.37377e-05
		2178.75	5.875e-05
		2180.5	7.34001e-05
		2182.25	8.52913e-05
		2184	9.21793e-05
		2185.75	9.26578e-05
		2187.5	8.66265e-05
		2189.25	7.5325e-05
		2191	6.09183e-05
		2192.75	4.58223e-05
		2194.5	3.20572e-05
		2196.25	2.08591e-05
		2198	1.26236e-05
		2199.75	7.10548e-06
		2201.5	3.71982e-06
		2203.25	1.81122e-06
		2205	8.2024e-07
		2206.75	3.45486e-07
		2208.5	1.35344e-07
		2210.25	4.93139e-08
		2212	1.67117e-08
		2213.75	5.26731e-09
		2215.5	1.54411e-09
		2217.25	0
		2219	0
		2220.75	0
		2222.5	2.10718e-09
		2224.25	3.07719e-09
		2226	4.45951e-09
		2227.75	6.4136e-09
		2229.5	9.15374e-09
		2231.25	1.29651e-08
		2233	1.82237e-08
		2234.75	2.54201e-08
		2236.5	3.51884e-08
		2238.25	4.83398e-08
		2240	6.59007e-08
		2241.75	8.91575e-08
		2243.5	1.19704e-07
		2245.25	1.59491e-07
		2247	2.10887e-07
		2248.75	2.76722e-07
		2250.5	3.60345e-07
		2252.25	4.65667e-07
		2254	5.97192e-07
		2255.75	7.60036e-07
		2257.5	9.59922e-07
		2259.25	1.20315e-06
		2261	1.49653e-06
		2262.75	1.84727e-06
		2264.5	2.26286e-06
		2266.25	2.75086e-06
		2268	3.31863e-06
		2269.75	3.97312e-06
		2271.5	4.72048e-06
		2273.25	5.56572e-06
		2275	6.51237e-06
		2276.75	7.56202e-06
		2278.5	8.71402e-06
		2280.25	9.96507e-06
		2282	1.1309e-05
		2283.75	1.27365e-05
		2285.5	1.4235e-05
		2287.25	1.57886e-05
		2289	1.73786e-05
		2290.75	1.89831e-05
		2292.5	2.05778e-05
		2294.25	2.21368e-05
		2296	2.36325e-05
		2297.75	2.50373e-05
		2299.5	2.63237e-05
		2301.25	2.74656e-05
		2303	2.84388e-05
		2304.75	2.92223e-05
		2306.5	2.97989e-05
		2308.25	3.01556e-05
		2310	3.02843e-05
		2311.75	3.01819e-05
		2313.5	2.9851e-05
		2315.25	2.9299e-05
		2317	2.85383e-05
		2318.75	2.75857e-05
		2320.5	2.6462e-05
		2322.25	2.51908e-05
		2324	2.37982e-05
		2325.75	2.23114e-05
		2327.5	2.07583e-05
		2329.25	1.91663e-05
		2331	1.75617e-05
		2332.75	1.59689e-05
		2334.5	1.44101e-05
		2336.25	1.29044e-05
		2338	1.14681e-05
		2339.75	1.01141e-05
		2341.5	8.85207e-06
		2343.25	7.68854e-06
		2345	6.62711e-06
		2346.75	5.66873e-06
		2348.5	4.81204e-06
		2350.25	4.05373e-06
		2352	3.38892e-06
		2353.75	2.81157e-06
		2355.5	2.31483e-06
		2357.25	1.89134e-06
		2359	1.53357e-06
		2360.75	1.23401e-06
		2362.5	9.85402e-07
		2364.25	7.80892e-07
		2366	6.14116e-07
		2367.75	4.79282e-07
		2369.5	3.71205e-07
		2371.25	2.8531e-07
		2373	2.17622e-07
		2374.75	1.64729e-07
		2376.5	1.23742e-07
		2378.25	9.22462e-08
		2380	6.82433e-08
		2381.75	5.01018e-08
		2383.5	3.6503e-08
		2385.25	2.63928e-08
		2387	1.89375e-08
		2388.75	1.34847e-08
		2390.5	9.52892e-09
		2392.25	8.97117e-09
		2394	1.3103e-08
		2395.75	3.18812e-08
		2397.5	9.34489e-08
		2399.25	2.62394e-07
		2401	6.89151e-07
		2402.75	1.66581e-06
		2404.5	3.70569e-06
		2406.25	7.5885e-06
		2408	1.43131e-05
		2409.75	2.48892e-05
		2411.5	3.99575e-05
		2413.25	5.93455e-05
		2415	8.17805e-05
		2416.75	0.00010499
		2418.5	0.000126256
		2420.25	0.000143215
		2422	0.000154505
		2423.75	0.000159943
		2425.5	0.000160186
		2427.25	0.000156192
		2429	0.000148838
		2430.75	0.000138888
		2432.5	0.000127168
		2434.25	0.000114701
		2436	0.000102624
		2437.75	9.1919e-05
		2439.5	8.31517e-05
		2441.25	7.63879e-05
		2443	7.1328e-05
		2444.75	6.75762e-05
		2446.5	6.4905e-05
		2448.25	6.33999e-05
		2450	6.34145e-05
		2451.75	6.53963e-05
		2453.5	6.96001e-05
		2455.25	7.583e-05
		2457	8.33168e-05
		2458.75	9.08133e-05
		2460.5	9.69154e-05
		2462.25	0.000100558
		2464	0.000101472
		2465.75	0.000100447
		2467.5	9.92495e-05
		2469.25	0.000100202
		2471	0.000105546
		2472.75	0.000116805
		2474.5	0.000134353
		2476.25	0.000157283
		2478	0.000183564
		2479.75	0.000210396
		2481.5	0.000234637
		2483.25	0.000253245
		2485	0.000263719
		2486.75	0.000264508
		2488.5	0.000255327
		2490.25	0.000237258
		2492	0.000212538
		2493.75	0.000184051
		2495.5	0.000154692
		2497.25	0.000126804
		2499	0.000101876
		2500.75	8.0536e-05
		2502.5	6.27731e-05
		2504.25	4.82289e-05
		2506	3.6441e-05
		2507.75	2.6982e-05
		2509.5	1.95005e-05
		2511.25	1.37064e-05
		2513	9.34006e-06
		2514.75	6.15877e-06
		2516.5	3.92238e-06
		2518.25	2.41019e-06
		2520	1.42737e-06
		2521.75	8.1508e-07
		2523.5	4.47651e-07
		2525.25	2.3731e-07
		2527	1.21136e-07
		2528.75	5.95403e-08
		2530.5	2.81791e-08
		2532.25	1.28418e-08
		2534	5.63509e-09
		2535.75	2.38099e-09
		2537.5	0
		2539.25	0
		2541	0
		2542.75	0
		2544.5	0
		2546.25	0
		2548	0
		2549.75	0
		2551.5	0
		2553.25	2.57389e-09
		2555	6.25225e-09
		2556.75	1.45865e-08
		2558.5	3.2684e-08
		2560.25	7.03375e-08
		2562	1.45381e-07
		2563.75	2.886e-07
		2565.5	5.50241e-07
		2567.25	1.00758e-06
		2569	1.77203e-06
		2570.75	2.99318e-06
		2572.5	4.85582e-06
		2574.25	7.56823e-06
		2576	1.13295e-05
		2577.75	1.6287e-05
		2579.5	2.24899e-05
		2581.25	2.98313e-05
		2583	3.80147e-05
		2584.75	4.65436e-05
		2586.5	5.4766e-05
		2588.25	6.19541e-05
		2590	6.74267e-05
		2591.75	7.06713e-05
		2593.5	7.14657e-05
		2595.25	6.99395e-05
		2597	6.6579e-05
		2598.75	6.21679e-05
		2600.5	5.76809e-05
		2602.25	5.41555e-05
		2604	5.25704e-05
		2605.75	5.37497e-05
		2607.5	5.82994e-05
		2609.25	6.65697e-05
		2611	7.86289e-05
		2612.75	9.42402e-05
		2614.5	0.000112826
		2616.25	0.000133463
		2618	0.000154882
		2619.75	0.000175559
		2621.5	0.000193873
		2623.25	0.000208353
		2625	0.000217994
		2626.75	0.000222562
		2628.5	0.00022285
		2630.25	0.000220701
		2632	0.000218667
		2633.75	0.000219257
		2635.5	0.000223876
		2637.25	0.000231975
		2639	0.000240949
		2640.75	0.000247158
		2642.5	0.000247688
		2644.25	0.000241955
		2646	0.000232224
		2647.75	0.000222768
		2649.5	0.000218256
		2651.25	0.000222215
		2653	0.000236179
		2654.75	0.000259575
		2656.5	0.000290114
		2658.25	0.000324471
		2660	0.000359118
		2661.75	0.000391154
		2663.5	0.000418873
		2665.25	0.000441845
		2667	0.000460519
		2668.75	0.000475681
		2670.5	0.000488086
		2672.25	0.000498469
		2674	0.000507792
		2675.75	0.000517405
		2677.5	0.000528893
		2679.25	0.000543565
		2681	0.000561812
		2682.75	0.000582626
		2684.5	0.00060352
		2686.25	0.000620935
		2688	0.000631007
		2689.75	0.000630439
		2691.5	0.000617231
		2693.25	0.00059104
		2695	0.000553136
		2696.75	0.000506036
		2698.5	0.000453014
		2700.25	0.00039762
		2702	0.000343381
		2703.75	0.000293588
		2705.5	0.000251095
		2707.25	0.000218045
		2709	0.000195532
		2710.75	0.000183337
		2712.5	0.000179936
		2714.25	0.00018274
		2716	0.00018854
		2717.75	0.00019391
		2719.5	0.000195663
		2721.25	0.00019145
		2723	0.000180546
		2724.75	0.000164416
		2726.5	0.000146547
		2728.25	0.000131321
		2730	0.000122328
		2731.75	0.000121027
		2733.5	0.000126469
		2735.25	0.000136135
		2737	0.000147341
		2738.75	0.000158472
		2740.5	0.000169502
		2742.25	0.000181698
		2744	0.000196805
		2745.75	0.000216091
		2747.5	0.000239676
		2749.25	0.000266334
		2751	0.000293767
		2752.75	0.000319184
		2754.5	0.000340007
		2756.25	0.000354487
		2758	0.000362088
		2759.75	0.000363546
		2761.5	0.000360572
		2763.25	0.000355273
		2765	0.000349439
		2766.75	0.000343973
		2768.5	0.000338665
		2770.25	0.00033243
		2772	0.000323899
		2773.75	0.0003121
		2775.5	0.000296916
		2777.25	0.000279142
		2779	0.000260172
		2780.75	0.000241515
		2782.5	0.000224368
		2784.25	0.000209409
		2786	0.000196806
		2787.75	0.000186365
		2789.5	0.000177699
		2791.25	0.000170373
		2793	0.000163994
		2794.75	0.000158244
		2796.5	0.000152931
		2798.25	0.000148026
		2800	0.000143713
		2801.75	0.000140465
		2803.5	0.000139112
		2805.25	0.000140861
		2807	0.000147119
		2808.75	0.000159048
		2810.5	0.000176798
		2812.25	0.000198701
		2814	0.000220947
		2815.75	0.000238238
		2817.5	0.000245444
		2819.25	0.00023957
		2821	0.000220961
		2822.75	0.000193072
		2824.5	0.000160933
		2826.25	0.000129276
		2828	0.000101251
		2829.75	7.81526e-05
		2831.5	5.99029e-05
		2833.25	4.57629e-05
		2835	3.48725e-05
		2836.75	2.65008e-05
		2838.5	2.00896e-05
		2840.25	1.52139e-05
		2842	1.15312e-05
		2843.75	8.76594e-06
		2845.5	6.69575e-06
		2847.25	5.15867e-06
		2849	4.03701e-06
		2850.75	3.26679e-06
		2852.5	2.83213e-06
		2854.25	2.76577e-06
		2856	3.15048e-06
		2857.75	4.11741e-06
		2859.5	5.84309e-06
		2861.25	8.52962e-06
		2863	1.23659e-05
		2864.75	1.74875e-05
		2866.5	2.39152e-05
		2868.25	3.14993e-05
		2870	3.98817e-05
		2871.75	4.8495e-05
		2873.5	5.6608e-05
		2875.25	6.34179e-05
		2877	6.81821e-05
		2878.75	7.03406e-05
		2880.5	6.96344e-05
		2882.25	6.61464e-05
		2884	6.02904e-05
		2885.75	5.27289e-05
		2887.5	4.42481e-05
		2889.25	3.56296e-05
		2891	2.75285e-05
		2892.75	2.04084e-05
		2894.5	1.45174e-05
		2896.25	9.90891e-06
		2898	6.48959e-06
		2899.75	4.07815e-06
		2901.5	2.45903e-06
		2903.25	1.42272e-06
		2905	7.89825e-07
		2906.75	4.20723e-07
		2908.5	2.15039e-07
		2910.25	1.05461e-07
		2912	4.96276e-08
		2913.75	2.24083e-08
		2915.5	9.70843e-09
		2917.25	4.03593e-09
		2919	1.60988e-09
		2920.75	0
		2922.5	0
		2924.25	0
		2926	0
		2927.75	0
		2929.5	0
		2931.25	0
		2933	0
		2934.75	0
		2936.5	0
		2938.25	0
		2940	0
		2941.75	0
		2943.5	0
		2945.25	0
		2947	0
		2948.75	0
		2950.5	0
		2952.25	0
		2954	0
		2955.75	0
		2957.5	0
		2959.25	0
		2961	0
		2962.75	0
		2964.5	0
		2966.25	0
		2968	3.08234e-09
		2969.75	1.45042e-08
		2971.5	6.03819e-08
		2973.25	2.22392e-07
		2975	7.24651e-07
		2976.75	2.089e-06
		2978.5	5.32778e-06
		2980.25	1.20213e-05
		2982	2.39971e-05
		2983.75	4.23803e-05
		2985.5	6.62168e-05
		2987.25	9.15316e-05
		2989	0.000111937
		2990.75	0.000121108
		2992.5	0.000115924
		2994.25	9.81684e-05
		2996	7.35477e-05
		2997.75	4.8749e-05
		2999.5	2.85865e-05
		3001.25	1.48305e-05
		3003	6.80688e-06
		3004.75	2.76401e-06
		3006.5	9.92959e-07
		3008.25	3.15589e-07
		3010	8.87381e-08
		3011.75	2.20749e-08
		3013.5	4.8583e-09
		3015.25	0
		3017	0
		3018.75	2.13045e-09
		3020.5	6.53303e-09
		3022.25	1.88197e-08
		3024	5.09295e-08
		3025.75	1.29474e-07
		3027.5	3.09208e-07
		3029.25	6.93706e-07
		3031	1.46204e-06
		3032.75	2.89465e-06
		3034.5	5.38383e-06
		3036.25	9.40683e-06
		3038	1.54402e-05
		3039.75	2.38077e-05
		3041.5	3.44857e-05
		3043.25	4.69263e-05
		3045	5.99907e-05
		3046.75	7.20491e-05
		3048.5	8.13051e-05
		3050.25	8.6236e-05
		3052	8.60383e-05
		3053.75	8.09097e-05
		3055.5	7.20694e-05
		3057.25	6.1512e-05
		3059	5.15851e-05
		3060.75	4.45134e-05
		3062.5	4.19666e-05
		3064.25	4.47226e-05
		3066	5.24554e-05
		3067.75	6.3696e-05
		3069.5	7.60357e-05
		3071.25	8.66107e-05
		3073	9.27997e-05
		3074.75	9.29319e-05
		3076.5	8.67402e-05
		3078.25	7.53694e-05
		3080	6.09346e-05
		3081.75	4.58279e-05
		3083.5	3.2059e-05
		3085.25	2.08591e-05
		3087	1.26236e-05
		3088.75	7.10548e-06
		3090.5	3.71982e-06
		3092.25	1.81122e-06
		3094	8.2024e-07
		3095.75	3.45486e-07
		3097.5	1.35344e-07
		3099.25	4.93139e-08
		3101	1.67117e-08
		3102.75	5.26731e-09
		3104.5	1.54411e-09
		3106.25	0
		3108	0
		3109.75	0
		3111.5	0
		3113.25	0
		3115	0
		3116.75	0
		3118.5	0
		3120.25	0
		3122	0
		3123.75	0
		3125.5	0
		3127.25	0
		3129	0
		3130.75	0
		3132.5	0
		3134.25	0
		3136	0
		3137.75	0
		3139.5	0
		3141.25	0
		3143	0
		3144.75	0
		3146.5	0
		3148.25	0
		3150	0
		3151.75	0
		3153.5	0
		3155.25	0
		3157	0
		3158.75	0
		3160.5	0
		3162.25	0
		3164	0
		3165.75	0
		3167.5	0
		3169.25	0
		3171	0
		3172.75	0
		3174.5	0
		3176.25	0
		3178	0
		3179.75	0
		3181.5	0
		3183.25	0
		3185	0
		3186.75	0
		3188.5	0
		3190.25	0
		3192	0
		3193.75	0
		3195.5	0
		3197.25	0
		3199	0
		3200.75	0
		3202.5	0
		3204.25	0
		3206	0
		3207.75	0
		3209.5	0
		3211.25	0
		3213	0
		3214.75	0
		3216.5	0
		3218.25	0
		3220	0
		3221.75	0
		3223.5	0
		3225.25	0
		3227	0
		3228.75	0
		3230.5	0
		3232.25	0
		3234	0
		3235.75	0
		3237.5	0
		3239.25	0
		3241	0
		3242.75	0
		3244.5	0
		3246.25	0
		3248	0
		3249.75	0
		3251.5	0
		3253.25	0
		3255	0
		3256.75	0
		3258.5	0
		3260.25	0
		3262	0
		3263.75	0
		3265.5	0
		3267.25	0
		3269	0
		3270.75	0
		3272.5	0
		3274.25	0
		3276	0
		3277.75	0
		3279.5	0
		3281.25	0
		3283	0
		3284.75	0
		3286.5	0
		3288.25	0
		3290	0
		3291.75	0
		3293.5	0
		3295.25	0
		3297	0
		3298.75	0
		3300.5	0
		3302.25	0
		3304	0
		3305.75	0
		3307.5	0
		3309.25	0
		3311	0
		3312.75	0
		3314.5	0
		3316.25	0
		3318	0
		3319.75	0
		3321.5	0
		3323.25	0
		3325	0
		3326.75	0
		3328.5	0
		3330.25	0
		3332	0
		3333.75	0
		3335.5	0
		3337.25	0
		3339	0
		3340.75	0
		3342.5	0
		3344.25	0
		3346	0
		3347.75	0
		3349.5	0
		3351.25	0
		3353	0
		3354.75	0
		3356.5	0
		3358.25	0
		3360	0
		3361.75	0
		3363.5	0
		3365.25	0
		3367	0
		3368.75	0
		3370.5	0
		3372.25	0
		3374	2.70674e-09
		3375.75	5.42907e-09
		3377.5	1.06173e-08
		3379.25	2.02445e-08
		3381	3.76366e-08
		3382.75	6.82214e-08
		3384.5	1.2057e-07
		3386.25	2.07762e-07
		3388	3.49062e-07
		3389.75	5.71802e-07
		3391.5	9.13264e-07
		3393.25	1.42218e-06
		3395	2.15935e-06
		3396.75	3.19667e-06
		3398.5	4.61405e-06
		3400.25	6.49342e-06
		3402	8.9099e-06
		3403.75	1.19201e-05
		3405.5	1.55488e-05
		3407.25	1.97751e-05
		3409	2.45217e-05
		3410.75	2.96477e-05
		3412.5	3.49493e-05
		3414.25	4.01693e-05
		3416	4.50151e-05
		3417.75	4.91847e-05
		3419.5	5.23974e-05
		3421.25	5.44249e-05
		3423	5.5118e-05
		3424.75	5.44249e-05
		3426.5	5.23974e-05
		3428.25	4.91847e-05
		3430	4.50151e-05
		3431.75	4.01693e-05
		3433.5	3.49493e-05
		3435.25	2.96477e-05
		3437	2.45217e-05
		3438.75	1.97751e-05
		3440.5	1.55488e-05
		3442.25	1.19201e-05
		3444	8.9099e-06
		3445.75	6.49342e-06
		3447.5	4.61405e-06
		3449.25	3.19667e-06
		3451	2.15935e-06
		3452.75	1.42218e-06
		3454.5	9.13264e-07
		3456.25	5.71802e-07
		3458	3.49062e-07
		3459.75	2.07762e-07
		3461.5	1.2057e-07
		3463.25	6.82214e-08
		3465	3.76366e-08
		3466.75	2.02445e-08
		3468.5	1.06173e-08
		3470.25	5.42907e-09
		3472	2.70674e-09
		3473.75	0
		3475.5	0
		3477.25	0
		3479	0
		3480.75	0
		3482.5	0
		3484.25	0
		3486	0
		3487.75	0
		3489.5	0
		3491.25	0
		3493	0
		3494.75	0
		3496.5	0
		3498.25	0
[truncated: 1 more rows]

## Sheet: PlotDat4
Source sheet	Sheet3	0	0	250	0	0	0
Plot name	ProbDens3	1.5	0	300	0	2998.5	0
Plot Type	16	3	0	300	3
1st free col	9	4.5	0	250	3
Sigma Level	2	6	0	250	0
Absolute Errs	TRUE	7.5	0	ErrBox	ErrBox
Symbol Type	1	9	0	300	0
Inverse Plot	FALSE	10.5	0	350	0
Color Plot	TRUE	12	0	350	9
3D plot	FALSE	13.5	0	300	9
Linear	FALSE	15	0	300	0
Data Range	F2:G392	16.5	0	ErrBox	ErrBox
Filled Symbols	FALSE	18	0	350	0
ConcAge	FALSE	19.5	0	400	0
ConcSwap	FALSE	21	0	400	1
1st Symbol-row	1	22.5	0	350	1
		24	0	350	0
		25.5	0	ErrBox	ErrBox
		27	0	400	0
		28.5	0	450	0
		30	0	450	5
		31.5	0	400	5
		33	0	400	0
		34.5	0	ErrBox	ErrBox
		36	0	450	0
		37.5	0	500	0
		39	0	500	12
		40.5	0	450	12
		42	0	450	0
		43.5	0	ErrBox	ErrBox
		45	0	500	0
		46.5	0	550	0
		48	0	550	2
		49.5	0	500	2
		51	0	500	0
		52.5	0	ErrBox	ErrBox
		54	0	550	0
		55.5	0	600	0
		57	0	600	1
		58.5	0	550	1
		60	0	550	0
		61.5	0	ErrBox	ErrBox
		63	0	850	0
		64.5	0	900	0
		66	0	900	3
		67.5	0	850	3
		69	0	850	0
		70.5	0	ErrBox	ErrBox
		72	0	900	0
		73.5	0	950	0
		75	0	950	4
		76.5	0	900	4
		78	0	900	0
		79.5	0	ErrBox	ErrBox
		81	0	950	0
		82.5	0	1000	0
		84	0	1000	8
		85.5	0	950	8
		87	0	950	0
		88.5	0	ErrBox	ErrBox
		90	0	1000	0
		91.5	0	1050	0
		93	0	1050	13
		94.5	0	1000	13
		96	0	1000	0
		97.5	0	ErrBox	ErrBox
		99	0	1050	0
		100.5	0	1100	0
		102	0	1100	14
		103.5	0	1050	14
		105	0	1050	0
		106.5	0	ErrBox	ErrBox
		108	0	1100	0
		109.5	0	1150	0
		111	0	1150	15
		112.5	0	1100	15
		114	0	1100	0
		115.5	0	ErrBox	ErrBox
		117	0	1150	0
		118.5	0	1200	0
		120	0	1200	12
		121.5	0	1150	12
		123	0	1150	0
		124.5	0	ErrBox	ErrBox
		126	0	1200	0
		127.5	0	1250	0
		129	0	1250	11
		130.5	0	1200	11
		132	0	1200	0
		133.5	0	ErrBox	ErrBox
		135	0	1250	0
		136.5	0	1300	0
		138	0	1300	8
		139.5	0	1250	8
		141	0	1250	0
		142.5	0	ErrBox	ErrBox
		144	0	1300	0
		145.5	0	1350	0
		147	0	1350	7
		148.5	0	1300	7
		150	0	1300	0
		151.5	0	ErrBox	ErrBox
		153	0	1350	0
		154.5	0	1400	0
		156	0	1400	8
		157.5	0	1350	8
		159	0	1350	0
		160.5	0	ErrBox	ErrBox
		162	0	1400	0
		163.5	0	1450	0
		165	0	1450	11
		166.5	0	1400	11
		168	0	1400	0
		169.5	0	ErrBox	ErrBox
		171	0	1450	0
		172.5	0	1500	0
		174	0	1500	12
		175.5	0	1450	12
		177	0	1450	0
		178.5	0	ErrBox	ErrBox
		180	0	1500	0
		181.5	0	1550	0
		183	0	1550	23
		184.5	0	1500	23
		186	0	1500	0
		187.5	0	ErrBox	ErrBox
		189	0	1550	0
		190.5	0	1600	0
		192	0	1600	25
		193.5	0	1550	25
		195	0	1550	0
		196.5	0	ErrBox	ErrBox
		198	0	1600	0
		199.5	0	1650	0
		201	0	1650	44
		202.5	0	1600	44
		204	0	1600	0
		205.5	0	ErrBox	ErrBox
		207	0	1650	0
		208.5	0	1700	0
		210	0	1700	30
		211.5	0	1650	30
		213	0	1650	0
		214.5	0	ErrBox	ErrBox
		216	0	1700	0
		217.5	0	1750	0
		219	0	1750	26
		220.5	0	1700	26
		222	0	1700	0
		223.5	0	ErrBox	ErrBox
		225	0	1750	0
		226.5	0	1800	0
		228	0	1800	20
		229.5	0	1750	20
		231	0	1750	0
		232.5	0	ErrBox	ErrBox
		234	0	1800	0
		235.5	0	1850	0
		237	0	1850	13
		238.5	0	1800	13
		240	2.66702e-09	1800	0
		241.5	7.50581e-08	ErrBox	ErrBox
		243	1.23666e-06	1850	0
		244.5	1.19284e-05	1900	0
		246	6.73586e-05	1900	8
		247.5	0.000222683	1850	8
		249	0.000430983	1850	0
		250.5	0.000488331	ErrBox	ErrBox
		252	0.000323929	1900	0
		253.5	0.000125796	1950	0
		255	2.85997e-05	1950	11
		256.5	3.81208e-06	1900	11
		258	3.98466e-07	1900	0
		259.5	1.24059e-06	ErrBox	ErrBox
		261	9.55655e-06	1950	0
		262.5	4.81405e-05	2000	0
		264	0.00015738	2000	4
		265.5	0.000338198	1950	4
		267	0.000499498	1950	0
		268.5	0.000570919	ErrBox	ErrBox
		270	0.000592727	2050	0
		271.5	0.000553531	2100	0
		273	0.000390372	2100	1
		274.5	0.000182992	2050	1
		276	5.4217e-05	2050	0
		277.5	9.99012e-06	ErrBox	ErrBox
		279	1.13837e-06	2200	0
		280.5	8.02352e-08	2250	0
		282	3.49145e-09	2250	2
		283.5	0	2200	2
		285	0	2200	0
		286.5	0	ErrBox	ErrBox
		288	0	2350	0
		289.5	1.26072e-08	2400	0
		291	1.41953e-07	2400	1
		292.5	1.19292e-06	2350	1
		294	7.27154e-06	2350	0
		295.5	3.28735e-05	ErrBox	ErrBox
		297	0.000111142	2450	0
		298.5	0.000282104	2500	0
		300	0.000536216	2500	1
		301.5	0.000760218	2450	1
		303	0.00081612	2450	0
		304.5	0.000717837	ErrBox	ErrBox
		306	0.000605818	2500	0
		307.5	0.000520637	2550	0
		309	0.000391189	2550	1
		310.5	0.000222704	2500	1
		312	0.0001063	2500	0
		313.5	0.000108176	ErrBox	ErrBox
		315	0.000255734	2550	0
		316.5	0.000529468	2600	0
		318	0.000804805	2600	2
		319.5	0.000919681	2550	2
		321	0.000850769	2550	0
		322.5	0.000711749	ErrBox	ErrBox
		324	0.00060575	2600	0
		325.5	0.000590966	2650	0
		327	0.000679871	2650	1
		328.5	0.000776062	2600	1
		330	0.000733124	2600	0
		331.5	0.000528055	ErrBox	ErrBox
		333	0.000282499	2650	0
		334.5	0.000111405	2700	0
		336	3.23188e-05	2700	6
		337.5	6.96381e-06	2650	6
		339	1.64634e-06	2650	0
		340.5	3.35501e-06	ErrBox	ErrBox
		342	1.40058e-05	2700	0
		343.5	4.6133e-05	2750	0
		345	0.00011572	2750	6
		346.5	0.000220887	2700	6
		348	0.000320849	2700	0
		349.5	0.00035465	ErrBox	ErrBox
		351	0.000298309	2750	0
		352.5	0.00019096	2800	0
		354	9.31633e-05	2800	4
		355.5	3.54938e-05	2750	4
		357	1.47863e-05	2750	0
		358.5	2.14996e-05	ErrBox	ErrBox
		360	5.79139e-05	2800	0
		361.5	0.000132119	2850	0
		363	0.000234375	2850	2
		364.5	0.000321703	2800	2
		366	0.000341569	2800	0
		367.5	0.000280527	ErrBox	ErrBox
		369	0.000178214	2850	0
		370.5	8.75752e-05	2900	0
		372	3.32884e-05	2900	1
		373.5	9.78761e-06	2850	1
		375	2.22604e-06	2850	0
		376.5	3.91616e-07	ErrBox	ErrBox
		378	5.32919e-08
		379.5	5.60962e-09
		381	0
		382.5	0
		384	0
		385.5	0
		387	0
		388.5	0
		390	0
		391.5	0
		393	0
		394.5	0
		396	0
		397.5	0
		399	0
		400.5	3.56556e-09
		402	2.86307e-08
		403.5	1.86274e-07
		405	9.81946e-07
		406.5	4.1941e-06
		408	1.45146e-05
		409.5	4.06995e-05
		411	9.24671e-05
		412.5	0.000170216
		414	0.000253882
		415.5	0.000306816
		417	0.000300427
		418.5	0.000238365
		420	0.000153309
		421.5	8.02888e-05
		423	3.5824e-05
		424.5	1.93432e-05
		426	2.69363e-05
		427.5	6.0886e-05
		429	0.000128331
		430.5	0.000232031
		432	0.000361805
		433.5	0.000495007
		435	0.000605386
		436.5	0.000671198
		438	0.000679005
		439.5	0.000629389
		441	0.00054449
		442.5	0.000464064
		444	0.000423435
		445.5	0.000430143
		447	0.000463351
		448.5	0.00049658
		450	0.00051841
		451.5	0.00053127
		453	0.000537027
		454.5	0.000530507
		456	0.000507219
		457.5	0.000473923
		459	0.000449178
		460.5	0.000453774
		462	0.000503679
		463.5	0.0006135
		465	0.00079867
		466.5	0.00105972
		468	0.00135712
		469.5	0.00160779
		471	0.00171934
		472.5	0.00164031
		474	0.00138861
		475.5	0.00103995
		477	0.000688089
		478.5	0.000404785
		480	0.000221074
		481.5	0.000133436
		483	0.000121628
		484.5	0.000162671
		486	0.000235181
		487.5	0.000318357
		489	0.000391666
		490.5	0.000436982
		492	0.000441974
		493.5	0.000403498
		495	0.000329871
		496.5	0.0002392
		498	0.000152446
		499.5	8.47412e-05
		501	4.08474e-05
		502.5	1.70022e-05
		504	6.0932e-06
		505.5	1.87639e-06
		507	4.95856e-07
		508.5	1.11026e-07
		510	2.16214e-08
		511.5	3.60308e-09
		513	0
		514.5	0
		516	0
		517.5	0
		519	0
		520.5	0
		522	1.3576e-08
		523.5	6.57638e-08
		525	2.79517e-07
		526.5	1.0426e-06
		528	3.41378e-06
		529.5	9.81611e-06
		531	2.48002e-05
		532.5	5.50963e-05
		534	0.000107706
		535.5	0.000185477
		537	0.000281738
		538.5	0.000378124
		540	0.000449416
		541.5	0.000474682
		543	0.000448309
		544.5	0.000383338
		546	0.000304764
		547.5	0.000237522
		549	0.000196578
		550.5	0.000183589
		552	0.000189738
		553.5	0.000201619
		555	0.000207017
		556.5	0.000198769
		558	0.000175998
		559.5	0.000142943
		561	0.000106283
		562.5	7.22971e-05
		564	4.49799e-05
		565.5	2.55946e-05
		567	1.33193e-05
		568.5	6.33892e-06
		570	2.75899e-06
		571.5	1.09821e-06
		573	3.99784e-07
		574.5	1.33096e-07
		576	4.05236e-08
		577.5	1.12837e-08
		579	2.8734e-09
		580.5	0
		582	0
		583.5	0
		585	0
		586.5	0
		588	0
		589.5	0
		591	0
		592.5	0
		594	0
		595.5	0
		597	0
		598.5	0
		600	0
		601.5	0
		603	0
		604.5	0
		606	0
		607.5	0
		609	0
		610.5	0
		612	0
		613.5	0
		615	0
		616.5	0
		618	0
		619.5	0
		621	0
		622.5	0
		624	0
		625.5	0
		627	0
		628.5	0
		630	0
		631.5	0
		633	0
		634.5	0
		636	0
		637.5	0
		639	0
		640.5	0
		642	0
		643.5	0
		645	0
		646.5	0
		648	0
		649.5	0
		651	0
		652.5	0
		654	0
		655.5	0
		657	0
		658.5	0
		660	0
		661.5	0
		663	0
		664.5	0
		666	0
		667.5	0
		669	0
		670.5	0
		672	0
		673.5	0
		675	0
		676.5	0
		678	0
		679.5	0
		681	0
		682.5	0
		684	0
		685.5	0
		687	0
		688.5	0
		690	0
		691.5	0
		693	0
		694.5	0
		696	0
		697.5	0
		699	0
		700.5	0
		702	0
		703.5	0
		705	0
		706.5	0
		708	0
		709.5	0
		711	0
		712.5	0
		714	0
		715.5	0
		717	0
		718.5	0
		720	0
		721.5	0
		723	0
		724.5	0
		726	0
		727.5	0
		729	0
		730.5	0
		732	0
		733.5	0
		735	0
		736.5	0
		738	0
		739.5	0
		741	0
		742.5	0
		744	0
		745.5	0
		747	0
		748.5	0
		750	0
		751.5	0
		753	0
		754.5	0
		756	0
		757.5	0
		759	0
		760.5	0
		762	0
		763.5	0
		765	0
		766.5	0
		768	0
		769.5	0
		771	0
		772.5	0
		774	0
		775.5	0
		777	0
		778.5	0
		780	0
		781.5	0
		783	0
		784.5	0
		786	0
		787.5	0
		789	0
		790.5	0
		792	0
		793.5	0
		795	0
		796.5	0
		798	0
		799.5	0
		801	0
		802.5	0
		804	0
		805.5	0
		807	0
		808.5	0
		810	0
		811.5	0
		813	0
		814.5	0
		816	0
		817.5	0
		819	3.02829e-09
		820.5	4.86359e-09
		822	1.17746e-08
		823.5	1.86336e-08
		825	2.91539e-08
		826.5	4.50967e-08
		828	6.89663e-08
		829.5	1.04273e-07
		831	1.58462e-07
		832.5	2.33697e-07
		834	3.40856e-07
		835.5	4.91641e-07
		837	7.01231e-07
		838.5	9.91959e-07
		840	1.38764e-06
		841.5	1.92452e-06
		843	2.65364e-06
		844.5	3.64082e-06
		846	4.99114e-06
		847.5	6.86488e-06
		849	9.49601e-06
		850.5	1.32389e-05
		852	1.85856e-05
		853.5	2.61731e-05
		855	3.67421e-05
		856.5	5.10298e-05
		858	6.95873e-05
		859.5	9.25444e-05
		861	0.000119378
		862.5	0.000148769
		864	0.00017864
		865.5	0.000206417
		867	0.000229483
		868.5	0.000245735
		870	0.000254042
		871.5	0.000254506
		873	0.000248388
		874.5	0.000237751
		876	0.000224948
		877.5	0.000212111
		879	0.000200777
		880.5	0.000191749
		882	0.000185146
		883.5	0.000180605
		885	0.000177516
		886.5	0.00017523
		888	0.000173203
		889.5	0.000171056
		891	0.000168576
		892.5	0.000165692
		894	0.000162438
		895.5	0.000158898
		897	0.000155186
		898.5	0.000151426
		900	0.000147733
		901.5	0.000144219
		903	0.000140975
		904.5	0.000138094
		906	0.000135649
		907.5	0.000133727
		909	0.000132412
		910.5	0.000131795
		912	0.000131969
		913.5	0.000133033
		915	0.000135077
		916.5	0.000138191
		918	0.000142428
		919.5	0.000147818
		921	0.00015435
		922.5	0.000161966
		924	0.000170551
		925.5	0.000179957
		927	0.000190013
		928.5	0.000200544
		930	0.000211432
		931.5	0.000222657
		933	0.000234338
		934.5	0.00024678
		936	0.000260475
		937.5	0.000276071
		939	0.000294276
		940.5	0.000315722
		942	0.000340792
		943.5	0.000369443
		945	0.000401078
		946.5	0.000434481
		948	0.000467917
		949.5	0.000499273
		951	0.000526361
		952.5	0.000547228
		954	0.000560453
		955.5	0.000565356
		957	0.000562085
		958.5	0.000551556
		960	0.000535272
		961.5	0.000515069
		963	0.00049284
		964.5	0.000470299
		966	0.000448843
		967.5	0.0004295
		969	0.000412953
		970.5	0.000399617
		972	0.000389701
		973.5	0.000383244
		975	0.000380116
		976.5	0.000379985
		978	0.000382289
		979.5	0.000386277
		981	0.000391067
		982.5	0.000395782
		984	0.000399688
		985.5	0.000402366
		987	0.000403807
		988.5	0.000404457
		990	0.000405195
		991.5	0.000407233
		993	0.000411944
		994.5	0.000420685
		996	0.000434558
		997.5	0.000454237
		999	0.00047979
		1000.5	0.000510589
		1002	0.000545298
		1003.5	0.000581964
		1005	0.000618197
		1006.5	0.000651438
		1008	0.000679246
		1009.5	0.000699628
		1011	0.000711243
		1012.5	0.0007136
		1014	0.000707067
		1015.5	0.000692786
		1017	0.000672484
		1018.5	0.000648218
		1020	0.000622101
		1021.5	0.000596061
		1023	0.000571683
		1024.5	0.000550103
		1026	0.000532028
		1027.5	0.00051778
		1029	0.000507391
		1030.5	0.000500721
		1032	0.000497533
		1033.5	0.000497537
		1035	0.000500399
		1036.5	0.00050572
		1038	0.000513012
		1039.5	0.000521683
		1041	0.000531033
		1042.5	0.000540329
		1044	0.000548856
		1045.5	0.000556032
		1047	0.000561474
		1048.5	0.000565062
		1050	0.000566948
		1051.5	0.000567514
		1053	0.000567301
		1054.5	0.00056694
		1056	0.000567063
		1057.5	0.000568228
		1059	0.000570905
		1060.5	0.000575436
		1062	0.000582046
		1063.5	0.000590825
		1065	0.000601705
		1066.5	0.00061444
		1068	0.000628601
		1069.5	0.000643588
		1071	0.000658694
		1072.5	0.0006732
		1074	0.000686485
		1075.5	0.000698139
		1077	0.000708044
		1078.5	0.000716353
		1080	0.000723462
		1081.5	0.000729858
		1083	0.000736003
		1084.5	0.000742154
		1086	0.000748307
		1087.5	0.000754141
		1089	0.000759067
		1090.5	0.00076233
		1092	0.000763148
		1093.5	0.000760891
		1095	0.000755219
		1096.5	0.000746215
		1098	0.000734419
		1099.5	0.000720826
		1101	0.000706802
		1102.5	0.000693917
		1104	0.000683715
		1105.5	0.000677506
		1107	0.000676144
		1108.5	0.000679874
		1110	0.000688293
		1111.5	0.000700416
		1113	0.000714844
		1114.5	0.00073002
		1116	0.00074451
		1117.5	0.000757238
		1119	0.000767666
		1120.5	0.000775835
		1122	0.000782302
		1123.5	0.000787953
		1125	0.000793788
		1126.5	0.000800664
		1128	0.000809139
		1129.5	0.000819328
		1131	0.00083088
		1132.5	0.000843074
		1134	0.00085491
		1135.5	0.000865278
		1137	0.00087311
		1138.5	0.00087749
		1140	0.000877761
		1141.5	0.000873537
		1143	0.000864745
		1144.5	0.000851595
		1146	0.000834555
		1147.5	0.000814317
		1149	0.000791752
		1150.5	0.000767893
		1152	0.000743848
		1153.5	0.000720767
		1155	0.000699766
		1156.5	0.00068184
		1158	0.000667776
		1159.5	0.00065807
		1161	0.000652849
		1162.5	0.000651851
		1164	0.000654418
		1165.5	0.000659556
		1167	0.000666033
		1168.5	0.000672518
		1170	0.00067774
		1171.5	0.000680635
		1173	0.000680469
		1174.5	0.000676914
		1176	0.000670081
		1177.5	0.000660465
		1179	0.000648857
		1180.5	0.00063621
		1182	0.000623476
		1183.5	0.000611475
		1185	0.000600755
		1186.5	0.000591533
		1188	0.000583663
		1189.5	0.000576687
		1191	0.000569914
		1192.5	0.00056256
		1194	0.000553888
		1195.5	0.000543339
		1197	0.000530628
		1198.5	0.000515814
		1200	0.000499288
		1201.5	0.00048176
		1203	0.000464163
		1204.5	0.00044758
		1206	0.000433131
		1207.5	0.000421901
		1209	0.000414836
		1210.5	0.000412716
		1212	0.000416098
		1213.5	0.000425317
		1215	0.000440451
		1216.5	0.000461321
		1218	0.000487491
		1219.5	0.000518259
		1221	0.000552677
		1222.5	0.000589599
		1224	0.000627697
		1225.5	0.000665551
		1227	0.000701737
		1228.5	0.000734921
		1230	0.000763934
		1231.5	0.000787841
		1233	0.00080599
		1234.5	0.000818001
		1236	0.000823759
		1237.5	0.00082334
		1239	0.000816977
		1240.5	0.000805001
		1242	0.000787814
		1243.5	0.000765871
		1245	0.000739687
		1246.5	0.000709865
		1248	0.000677112
		1249.5	0.000642259
		1251	0.000606245
		1252.5	0.000570086
		1254	0.000534834
		1255.5	0.000501485
		1257	0.000470929
		1258.5	0.000443868
		1260	0.000420763
		1261.5	0.000401812
		1263	0.000386936
		1264.5	0.000375814
		1266	0.00036792
		1267.5	0.000362576
		1269	0.000359021
		1270.5	0.000356479
		1272	0.000354204
		1273.5	0.000351539
		1275	0.000347952
		1276.5	0.000343045
		1278	0.000336571
		1279.5	0.000328439
		1281	0.000318691
		1282.5	0.000307469
		1284	0.000295022
		1285.5	0.000281655
		1287	0.000267705
		1288.5	0.000253527
		1290	0.000239458
		1291.5	0.000225807
		1293	0.000212851
		1294.5	0.000200806
		1296	0.000189852
		1297.5	0.000180121
		1299	0.00017172
		1300.5	0.00016472
		1302	0.000159183
		1303.5	0.000155171
		1305	0.000152748
		1306.5	0.000152001
		1308	0.000153037
		1309.5	0.000155989
		1311	0.000161025
		1312.5	0.000168328
		1314	0.00017809
		1315.5	0.00019051
		1317	0.00020576
		1318.5	0.000223973
		1320	0.000245207
		1321.5	0.000269426
		1323	0.000296464
		1324.5	0.000326012
		1326	0.000357597
		1327.5	0.000390585
		1329	0.000424189
		1330.5	0.000457489
		1332	0.000489501
		1333.5	0.000519204
		1335	0.000545611
		1336.5	0.000567847
		1338	0.000585218
		1339.5	0.000597254
		1341	0.000603745
		1342.5	0.000604767
		1344	0.000600676
		1345.5	0.000592064
		1347	0.000579721
		1348.5	0.000564578
		1350	0.000547641
		1351.5	0.000529934
		1353	0.000512451
		1354.5	0.000496125
		1356	0.000481792
		1357.5	0.000470192
		1359	0.000461938
		1360.5	0.000457524
		1362	0.000457282
		1363.5	0.000461361
		1365	0.00046968
		1366.5	0.000481904
		1368	0.000497402
		1369.5	0.000515261
		1371	0.000534297
		1372.5	0.000553133
		1374	0.000570296
		1375.5	0.000584342
		1377	0.000593999
		1378.5	0.000598283
		1380	0.000596633
		1381.5	0.000588939
		1383	0.000575576
		1384.5	0.000557336
		1386	0.000535361
		1387.5	0.000510962
		1389	0.000485523
		1390.5	0.00046032
		1392	0.000436421
		1393.5	0.000414618
		1395	0.000395336
		1396.5	0.000378723
		1398	0.000364668
		1399.5	0.000352882
		1401	0.000343013
		1402.5	0.000334723
		1404	0.000327773
		1405.5	0.000322061
		1407	0.000317641
		1408.5	0.000314719
		1410	0.000313601
		1411.5	0.000314618
		1413	0.000318109
		1414.5	0.000324349
		1416	0.000333497
		1417.5	0.000345594
		1419	0.000360557
		1420.5	0.000378186
		1422	0.000398192
		1423.5	0.000420222
		1425	0.000443888
		1426.5	0.000468761
		1428	0.000494413
		1429.5	0.000520356
		1431	0.000546104
		1432.5	0.00057112
		1434	0.00059484
		1435.5	0.00061668
		1437	0.000636068
		1438.5	0.000652473
		1440	0.00066543
		1441.5	0.000674596
		1443	0.000679756
		1444.5	0.000680844
		1446	0.000677946
		1447.5	0.000671296
		1449	0.000661262
		1450.5	0.000648304
		1452	0.000632974
		1453.5	0.000615885
		1455	0.000597707
		1456.5	0.000579152
		1458	0.000560962
		1459.5	0.000543918
		1461	0.000528794
		1462.5	0.000516373
		1464	0.000507397
		1465.5	0.000502544
		1467	0.000502379
		1468.5	0.000507312
		1470	0.000517573
		1471.5	0.00053317
		1473	0.000553891
		1474.5	0.00057929
		1476	0.000608724
		1477.5	0.000641398
		1479	0.000676431
		1480.5	0.000712921
		1482	0.000750035
		1483.5	0.000787071
		1485	0.000823529
		1486.5	0.000859111
		1488	0.000893757
		1489.5	0.000927591
		1491	0.000960876
		1492.5	0.000993921
		1494	0.00102703
		1495.5	0.00106038
		1497	0.001094
		1498.5	0.00112771
		1500	0.00116112
		1501.5	0.00119363
		1503	0.00122447
		1504.5	0.00125279
		1506	0.00127767
		1507.5	0.00129824
		1509	0.00131372
		1510.5	0.00132345
		1512	0.00132701
		1513.5	0.00132419
		1515	0.00131505
		1516.5	0.00129993
		1518	0.00127941
		1519.5	0.00125432
		1521	0.00122566
		1522.5	0.0011946
		1524	0.00116233
		1525.5	0.00113006
		1527	0.00109893
		1528.5	0.00106992
		1530	0.00104383
		1531.5	0.00102127
		1533	0.00100265
		1534.5	0.000988186
		1536	0.000977951
		1537.5	0.000971933
		1539	0.000970078
		1540.5	0.000972336
		1542	0.000978691
		1543.5	0.000989192
		1545	0.00100391
		1546.5	0.00102293
		1548	0.00104626
		1549.5	0.00107378
		1551	0.00110515
		1552.5	0.00113976
		1554	0.00117671
		1555.5	0.00121474
		1557	0.00125236
		1558.5	0.00128785
		1560	0.00131948
		1561.5	0.00134555
		1563	0.00136465
		1564.5	0.00137574
		1566	0.00137827
		1567.5	0.0013723
		1569	0.0013584
		1570.5	0.00133769
		1572	0.00131164
		1573.5	0.00128199
		1575	0.00125053
		1576.5	0.00121893
		1578	0.00118864
		1579.5	0.00116077
		1581	0.001136
		1582.5	0.00111469
		1584	0.00109681
		1585.5	0.00108213
		1587	0.00107031
		1588.5	0.00106097
		1590	0.00105388
		1591.5	0.00104897
		1593	0.00104649
		1594.5	0.00104692
		1596	0.00105101
		1597.5	0.00105977
		1599	0.00107437
		1600.5	0.00109603
		1602	0.001126
		1603.5	0.00116536
		1605	0.00121499
		1606.5	0.00127546
		1608	0.0013469
		1609.5	0.00142901
		1611	0.00152096
		1612.5	0.00162138
		1614	0.00172838
		1615.5	0.00183962
		1617	0.00195242
		1618.5	0.00206388
		1620	0.0021711
		1621.5	0.00227136
		1623	0.00236232
		1624.5	0.00244219
		1626	0.0025099
		1627.5	0.00256507
		1629	0.00260803
		1630.5	0.00263971
		1632	0.0026615
		1633.5	0.00267502
		1635	0.00268194
		1636.5	0.00268378
		1638	0.00268174
		1639.5	0.00267666
		1641	0.0026689
		1642.5	0.00265844
		1644	0.00264489
		1645.5	0.00262763
		1647	0.00260591
		1648.5	0.002579
		1650	0.00254633
		1651.5	0.00250757
		1653	0.00246278
		1654.5	0.0024124
		1656	0.00235728
		1657.5	0.00229859
		1659	0.00223778
		1660.5	0.00217633
		1662	0.00211566
		1663.5	0.0020569
		1665	0.00200081
		1666.5	0.00194768
		1668	0.00189732
		1669.5	0.00184914
		1671	0.00180235
		1672.5	0.00175608
		1674	0.00170966
		1675.5	0.00166273
		1677	0.0016154
		1678.5	0.00156824
		1680	0.00152229
		1681.5	0.00147891
		1683	0.00143961
		1684.5	0.00140585
		1686	0.00137891
		1687.5	0.00135959
		1689	0.00134823
		1690.5	0.0013445
		1692	0.00134744
		1693.5	0.00135555
		1695	0.00136674
		1696.5	0.00137865
		1698	0.00138876
		1699.5	0.00139465
		1701	0.00139426
		1702.5	0.00138611
		1704	0.00136953
		1705.5	0.00134476
		1707	0.001313
		1708.5	0.00127634
		1710	0.00123759
		1711.5	0.00119988
		1713	0.00116631
		1714.5	0.00113949
		1716	0.00112111
		1717.5	0.00111168
		1719	0.00111047
		1720.5	0.00111567
		1722	0.00112486
		1723.5	0.00113553
		1725	0.0011456
		1726.5	0.00115387
		1728	0.0011601
		1729.5	0.00116492
		1731	0.00116949
		1732.5	0.00117514
		1734	0.00118295
		1735.5	0.00119352
		1737	0.0012069
		1738.5	0.00122261
		1740	0.00123981
		1741.5	0.00125747
		1743	0.0012745
		1744.5	0.00128986
		1746	0.00130264
		1747.5	0.0013121
		1749	0.00131765
		1750.5	0.00131882
		1752	0.00131535
		1753.5	0.0013071
		1755	0.00129412
		1756.5	0.0012766
		1758	0.00125498
		1759.5	0.00122984
		1761	0.00120196
		1762.5	0.00117225
		1764	0.00114173
		1765.5	0.00111146
		1767	0.00108246
		1768.5	0.00105569
		1770	0.00103189
		1771.5	0.00101163
		1773	0.000995165
		1774.5	0.000982473
		1776	0.000973231
		1777.5	0.000966837
		1779	0.00096246
		1780.5	0.000959124
		1782	0.000955813
		1783.5	0.000951569
		1785	0.000945615
		1786.5	0.000937437
		1788	0.000926851
		1789.5	0.000914006
		1791	0.000899326
		1792.5	0.00088346
		1794	0.000867164
		1795.5	0.000851186
		1797	0.00083615
		1798.5	0.000822495
		1800	0.000810432
		1801.5	0.000799985
		1803	0.000791004
		1804.5	0.000783275
		1806	0.000776595
		1807.5	0.00077083
		1809	0.000765979
		1810.5	0.000762155
		1812	0.000759547
		1813.5	0.000758363
		1815	0.000758725
		1816.5	0.000760577
		1818	0.000763603
		1819.5	0.00076721
		1821	0.000770495
		1822.5	0.000772335
		1824	0.000771484
		1825.5	0.000766722
		1827	0.000756986
		1828.5	0.000741557
		1830	0.000720161
		1831.5	0.000693045
		1833	0.000660997
		1834.5	0.00062528
		1836	0.000587531
		1837.5	0.000549593
		1839	0.000513326
		1840.5	0.000480424
		1842	0.000452218
		1843.5	0.000429589
		1845	0.000412888
		1846.5	0.00040193
		1848	0.00039609
		1849.5	0.000394426
		1851	0.000395843
		1852.5	0.00039926
		1854	0.000403763
		1855.5	0.000408709
		1857	0.000413751
		1858.5	0.00041884
		1860	0.000424124
		1861.5	0.00042985
		1863	0.000436244
		1864.5	0.000443419
		1866	0.000451312
		1867.5	0.000459695
		1869	0.000468188
		1870.5	0.000476346
		1872	0.000483734
		1873.5	0.000490034
		1875	0.000495057
		1876.5	0.000498804
		1878	0.000501451
		1879.5	0.000503292
		1881	0.000504704
		1882.5	0.000506081
		1884	0.000507768
		1885.5	0.000510029
		1887	0.000513009
		1888.5	0.000516742
		1890	0.000521155
		1891.5	0.000526087
		1893	0.000531321
		1894.5	0.000536602
		1896	0.000541677
		1897.5	0.0005463
		1899	0.000550253
		1900.5	0.000553366
		1902	0.000555502
		1903.5	0.000556579
		1905	0.00055656
		1906.5	0.000555459
		1908	0.000553339
		1909.5	0.000550306
		1911	0.000546508
		1912.5	0.000542123
		1914	0.000537362
		1915.5	0.000532443
		1917	0.000527588
		1918.5	0.000522989
		1920	0.000518803
		1921.5	0.000515124
		1923	0.000511985
		1924.5	0.000509323
		1926	0.000507001
		1927.5	0.000504809
		1929	0.000502475
		1930.5	0.000499696
		1932	0.000496171
		1933.5	0.000491625
		1935	0.000485833
		1936.5	0.000478637
		1938	0.000469948
		1939.5	0.000459736
		1941	0.000448014
		1942.5	0.000434815
		1944	0.000420172
		1945.5	0.000404111
		1947	0.000386648
		1948.5	0.00036781
		1950	0.00034766
		1951.5	0.000326325
		1953	0.000304025
		1954.5	0.000281083
		1956	0.000257924
		1957.5	0.000235054
		1959	0.000213011
		1960.5	0.000192332
		1962	0.000173492
		1963.5	0.000156863
		1965	0.00014269
		1966.5	0.000131076
		1968	0.000121988
		1969.5	0.000115278
		1971	0.000110709
		1972.5	0.000107987
		1974	0.000106791
		1975.5	0.000106801
		1977	0.000107711
		1978.5	0.000109249
		1980	0.000111173
		1981.5	0.00011328
		1983	0.000115397
		1984.5	0.000117387
		1986	0.000119134
		1987.5	0.00012054
		1989	0.000121532
		1990.5	0.000122057
		1992	0.000122063
		1993.5	0.000121521
		1995	0.000120409
		1996.5	0.000118734
		1998	0.000116493
		1999.5	0.000113713
		2001	0.000110419
		2002.5	0.000106652
		2004	0.000102456
		2005.5	9.78895e-05
		2007	9.30145e-05
		2008.5	8.7892e-05
		2010	8.25861e-05
		2011.5	7.71682e-05
		2013	7.17007e-05
		2014.5	6.62446e-05
		2016	6.08618e-05
		2017.5	5.56086e-05
		2019	5.0531e-05
		2020.5	4.56721e-05
		2022	4.1068e-05
		2023.5	3.67488e-05
		2025	3.27379e-05
		2026.5	2.9053e-05
		2028	2.57061e-05
		2029.5	2.27044e-05
		2031	2.00508e-05
		2032.5	1.77447e-05
		2034	1.5783e-05
		2035.5	1.41601e-05
		2037	1.28691e-05
		2038.5	1.19024e-05
		2040	1.12514e-05
		2041.5	1.09077e-05
		2043	1.08625e-05
		2044.5	1.11072e-05
		2046	1.16328e-05
		2047.5	1.243e-05
		2049	1.34887e-05
		2050.5	1.47977e-05
		2052	1.63444e-05
		2053.5	1.81139e-05
		2055	2.00891e-05
		2056.5	2.22497e-05
		2058	2.45726e-05
		2059.5	2.70312e-05
		2061	2.95953e-05
		2062.5	3.22317e-05
		2064	3.49038e-05
		2065.5	3.75728e-05
		2067	4.01974e-05
		2068.5	4.27354e-05
		2070	4.51442e-05
		2071.5	4.73817e-05
		2073	4.9405e-05
		2074.5	5.11822e-05
		2076	5.26763e-05
		2077.5	5.38584e-05
		2079	5.47053e-05
		2080.5	5.51999e-05
		2082	5.53286e-05
		2083.5	5.50972e-05
		2085	5.45049e-05
		2086.5	5.35634e-05
		2088	5.2291e-05
		2089.5	5.07122e-05
		2091	4.88566e-05
		2092.5	4.67586e-05
		2094	4.44555e-05
		2095.5	4.1987e-05
		2097	3.93941e-05
		2098.5	3.67176e-05
		2100	3.39972e-05
		2101.5	3.12708e-05
		2103	2.85733e-05
		2104.5	2.59363e-05
		2106	2.33874e-05
		2107.5	2.09499e-05
		2109	1.86427e-05
		2110.5	1.64802e-05
		2112	1.44724e-05
		2113.5	1.26255e-05
		2115	1.09415e-05
		2116.5	9.41969e-06
		2118	8.05603e-06
		2119.5	6.84726e-06
		2121	5.78066e-06
		2122.5	4.84896e-06
		2124	4.04189e-06
		2125.5	3.34874e-06
		2127	2.75864e-06
		2128.5	2.26094e-06
		2130	1.84542e-06
		2131.5	1.50256e-06
		2133	1.22365e-06
		2134.5	1.00094e-06
		2136	8.27734e-07
		2137.5	6.98436e-07
		2139	6.08581e-07
		2140.5	5.54855e-07
		2142	5.35102e-07
		2143.5	5.48312e-07
		2145	5.94615e-07
		2146.5	6.75261e-07
		2148	7.92605e-07
		2149.5	9.50072e-07
		2151	1.15213e-06
		2152.5	1.40425e-06
		2154	1.71283e-06
		2155.5	2.08513e-06
		2157	2.52915e-06
		2158.5	3.05352e-06
		2160	3.6673e-06
		2161.5	4.37981e-06
		2163	5.20036e-06
		2164.5	6.1356e-06
		2166	7.19941e-06
		2167.5	8.39596e-06
		2169	9.73142e-06
		2170.5	1.12102e-05
		2172	1.28347e-05
		2173.5	1.46046e-05
		2175	1.65168e-05
		2176.5	1.8565e-05
		2178	2.07436e-05
		2179.5	2.30351e-05
		2181	2.54262e-05
		2182.5	2.78993e-05
		2184	3.04354e-05
		2185.5	3.30157e-05
		2187	3.56239e-05
		2188.5	3.82489e-05
		2190	4.08883e-05
		2191.5	4.35528e-05
		2193	4.62708e-05
		2194.5	4.90919e-05
		2196	5.20901e-05
		2197.5	5.53643e-05
		2199	5.90346e-05
		2200.5	6.32349e-05
		2202	6.80986e-05
		2203.5	7.37396e-05
		2205	8.02286e-05
		2206.5	8.75676e-05
		2208	9.56663e-05
		2209.5	0.000104325
		2211	0.000113228
		2212.5	0.000121953
		2214	0.000129998
		2215.5	0.000136819
		2217	0.000141888
		2218.5	0.000144745
		2220	0.00014506
		2221.5	0.000142669
		2223	0.000137599
		2224.5	0.000130069
		2226	0.000120468
		2227.5	0.000109309
		2229	9.71749e-05
		2230.5	8.46609e-05
		2232	7.23179e-05
		2233.5	6.06104e-05
		2235	4.98885e-05
		2236.5	4.03784e-05
		2238	3.21868e-05
		2239.5	2.53177e-05
		2241	1.96963e-05
		2242.5	1.51949e-05
		2244	1.16576e-05
		2245.5	8.92064e-06
		2247	6.82787e-06
		2248.5	5.23992e-06
		2250	4.03908e-06
		2251.5	3.13023e-06
		2253	2.43919e-06
		2254.5	1.9099e-06
		2256	1.50087e-06
		2257.5	1.18192e-06
		2259	9.31224e-07
		2260.5	7.32981e-07
		2262	5.75621e-07
		2263.5	4.5053e-07
		2265	3.48994e-07
		2266.5	2.71359e-07
		2268	2.09703e-07
		2269.5	1.61063e-07
		2271	1.22948e-07
		2272.5	9.32779e-08
		2274	7.03345e-08
		2275.5	5.27098e-08
		2277	3.92596e-08
		2278.5	2.90626e-08
		2280	2.13823e-08
		2281.5	1.56354e-08
		2283	1.1363e-08
		2284.5	8.20752e-09
		2286	5.892e-09
		2287.5	4.20385e-09
		2289	2.98101e-09
		2290.5	2.82842e-09
		2292	4.2769e-09
		2293.5	6.41105e-09
		2295	9.52676e-09
		2296.5	1.40338e-08
		2298	2.04938e-08
		2299.5	2.96678e-08
		2301	4.25759e-08
		2302.5	6.057e-08
		2304	8.54213e-08
		2305.5	1.19424e-07
		2307	1.65513e-07
		2308.5	2.27398e-07
		2310	3.09712e-07
		2311.5	4.18162e-07
		2313	5.5969e-07
		2314.5	7.42618e-07
		2316	9.76785e-07
		2317.5	1.27364e-06
		2319	1.64631e-06
		2320.5	2.10956e-06
		2322	2.67971e-06
		2323.5	3.37442e-06
		2325	4.21237e-06
		2326.5	5.21277e-06
		2328	6.39479e-06
		2329.5	7.77678e-06
		2331	9.37538e-06
		2332.5	1.12045e-05
		2334	1.32744e-05
		2335.5	1.55901e-05
		2337	1.8151e-05
		2338.5	2.09492e-05
		2340	2.3969e-05
		2341.5	2.71861e-05
		2343	3.05675e-05
		2344.5	3.40714e-05
		2346	3.76473e-05
		2347.5	4.12377e-05
		2349	4.47785e-05
		2350.5	4.82015e-05
		2352	5.1436e-05
		2353.5	5.44114e-05
		2355	5.70594e-05
		2356.5	5.93172e-05
		2358	6.11293e-05
		2359.5	6.24503e-05
		2361	6.32462e-05
		2362.5	6.34965e-05
		2364	6.31947e-05
		2365.5	6.23487e-05
		2367	6.09803e-05
		2368.5	5.91245e-05
		2370	5.68278e-05
		2371.5	5.41464e-05
		2373	5.11439e-05
		2374.5	4.78888e-05
		2376	4.44518e-05
		2377.5	4.09035e-05
		2379	3.73119e-05
		2380.5	3.37403e-05
		2382	3.02459e-05
		2383.5	2.68782e-05
		2385	2.36782e-05
		2386.5	2.06782e-05
		2388	1.79017e-05
		2389.5	1.53635e-05
		2391	1.30707e-05
		2392.5	1.10237e-05
		2394	9.21655e-06
		2395.5	7.63882e-06
		2397	6.27624e-06
		2398.5	5.11197e-06
		2400	4.12755e-06
		2401.5	3.30379e-06
		2403	2.62149e-06
		2404.5	2.06205e-06
		2406	1.60792e-06
		2407.5	1.24293e-06
		2409	9.52456e-07
		2410.5	7.23533e-07
		2412	5.44862e-07
		2413.5	4.06753e-07
		2415	3.01017e-07
		2416.5	2.23436e-07
		2418	1.64372e-07
		2419.5	1.21206e-07
		2421	9.04902e-08
		2422.5	6.96021e-08
		2424	5.66294e-08
		2425.5	5.02771e-08
		2427	4.97926e-08
		2428.5	5.49147e-08
		2430	6.58416e-08
		2431.5	8.32207e-08
		2433	1.08156e-07
		2434.5	1.42233e-07
		2436	1.85778e-07
		2437.5	2.45663e-07
		2439	3.22588e-07
		2440.5	4.20649e-07
		2442	5.44699e-07
		2443.5	7.00416e-07
		2445	8.94376e-07
		2446.5	1.13409e-06
		2448	1.42804e-06
		2449.5	1.78564e-06
		2451	2.21724e-06
		2452.5	2.73399e-06
		2454	3.34768e-06
		2455.5	4.07056e-06
		2457	4.91506e-06
		2458.5	5.89342e-06
		2460	7.01729e-06
		2461.5	8.29728e-06
		2463	9.74239e-06
		2464.5	1.13629e-05
		2466	1.31577e-05
		2467.5	1.51302e-05
		2469	1.72775e-05
		2470.5	1.95927e-05
		2472	2.20642e-05
		2473.5	2.46754e-05
		2475	2.74051e-05
		2476.5	3.02267e-05
		2478	3.31096e-05
		2479.5	3.60188e-05
		2481	3.8916e-05
		2482.5	4.17635e-05
		2484	4.45146e-05
		2485.5	4.71293e-05
		2487	4.95669e-05
		2488.5	5.17896e-05
		2490	5.37635e-05
		2491.5	5.54605e-05
		2493	5.68592e-05
		2494.5	5.79459e-05
		2496	5.87161e-05
		2497.5	5.9174e-05
		2499	5.93338e-05
		2500.5	5.92189e-05
		2502	5.88616e-05
		2503.5	5.83026e-05
		2505	5.75896e-05
		2506.5	5.67761e-05
		2508	5.59195e-05
		2509.5	5.50797e-05
		2511	5.43171e-05
		2512.5	5.36906e-05
		2514	5.32582e-05
		2515.5	5.30663e-05
		2517	5.31604e-05
		2518.5	5.35762e-05
		2520	5.43398e-05
		2521.5	5.54678e-05
		2523	5.69656e-05
		2524.5	5.88282e-05
		2526	6.10398e-05
		2527.5	6.35779e-05
		2529	6.6402e-05
		2530.5	6.94709e-05
		2532	7.2734e-05
		2533.5	7.6135e-05
		2535	7.96136e-05
		2536.5	8.31069e-05
		2538	8.65515e-05
		2539.5	8.98847e-05
		2541	9.30465e-05
		2542.5	9.5981e-05
		2544	9.86379e-05
		2545.5	0.000100974
		2547	0.000102953
		2548.5	0.00010455
		2550	0.000105746
		2551.5	0.000106535
		2553	0.00010692
		2554.5	0.000106915
		2556	0.000106543
		2557.5	0.000105836
		2559	0.000104835
		2560.5	0.000103589
		2562	0.00010215
		2563.5	0.000100578
		2565	9.89324e-05
		2566.5	9.72755e-05
		2568	9.56674e-05
		2569.5	9.41653e-05
		2571	9.28216e-05
		2572.5	9.16819e-05
		2574	9.07838e-05
		2575.5	9.01555e-05
		2577	8.98123e-05
		2578.5	8.9767e-05
		2580	9.00119e-05
		2581.5	9.05321e-05
		2583	9.13021e-05
		2584.5	9.2287e-05
		2586	9.34438e-05
		2587.5	9.47225e-05
		2589	9.60682e-05
		2590.5	9.74227e-05
		2592	9.87292e-05
		2593.5	9.99244e-05
		2595	0.000100953
		2596.5	0.000101764
		2598	0.000102308
		2599.5	0.000102545
		2601	0.000102443
		2602.5	0.000101976
		2604	0.00010113
		2605.5	9.98958e-05
		2607	9.82824e-05
		2608.5	9.62909e-05
		2610	9.3944e-05
		2611.5	9.12682e-05
		2613	8.82964e-05
		2614.5	8.50681e-05
		2616	8.16276e-05
		2617.5	7.80238e-05
		2619	7.43122e-05
		2620.5	7.05433e-05
		2622	6.67743e-05
		2623.5	6.30694e-05
		2625	5.94847e-05
		2626.5	5.6083e-05
		2628	5.2921e-05
		2629.5	5.00561e-05
		2631	4.75471e-05
		2632.5	4.54497e-05
		2634	4.38213e-05
		2635.5	4.27084e-05
		2637	4.21639e-05
		2638.5	4.22341e-05
		2640	4.29728e-05
		2641.5	4.44285e-05
		2643	4.66458e-05
		2644.5	4.96798e-05
		2646	5.3591e-05
		2647.5	5.8438e-05
		2649	6.42935e-05
		2650.5	7.12352e-05
		2652	7.93464e-05
		2653.5	8.87127e-05
		2655	9.94196e-05
		2656.5	0.000111534
		2658	0.000125109
		2659.5	0.000140163
		2661	0.00015667
		2662.5	0.000174552
		2664	0.000193664
		2665.5	0.000213794
		2667	0.000234661
		2668.5	0.000255922
		2670	0.000277177
		2671.5	0.000297992
		2673	0.000317908
		2674.5	0.000336472
		2676	0.000353242
		2677.5	0.000367833
		2679	0.00037991
		2680.5	0.000389226
		2682	0.000395636
		2683.5	0.000399124
		2685	0.00039982
		2686.5	0.000398025
		2688	0.00039423
		2689.5	0.000389105
		2691	0.000383491
		2692.5	0.000378329
		2694	0.00037455
		2695.5	0.000372932
		2697	0.000373927
		2698.5	0.000377504
		2700	0.000383067
		2701.5	0.000389457
		2703	0.000395108
		2704.5	0.000398316
		2706	0.00039757
		2707.5	0.000391865
		2709	0.000380925
		2710.5	0.00036525
		2712	0.000346
		2713.5	0.000324739
		2715	0.000303116
		2716.5	0.000282578
		2718	0.000264157
		2719.5	0.000248412
		2721	0.000235438
		2722.5	0.000224996
		2724	0.000216643
		2725.5	0.000209875
		2727	0.000204224
		2728.5	0.00019935
		2730	0.000195104
		2731.5	0.000191662
		2733	0.000189699
		2734.5	0.000190611
		2736	0.000196608
		2737.5	0.000210386
		2739	0.000234083
		2740.5	0.000267638
		2742	0.000307275
		2743.5	0.00034531
		2745	0.0003722
		2746.5	0.000380268
		2748	0.000367262
		2749.5	0.000337524
		2751	0.000300014
		2752.5	0.000264436
		2754	0.000237744
		2755.5	0.000222639
		2757	0.000218175
		2758.5	0.000221418
		2760	0.000228998
		2761.5	0.000238017
		2763	0.000246328
		2764.5	0.000252474
		2766	0.000255567
		2767.5	0.000255191
		2769	0.000251339
		2770.5	0.000244368
		2772	0.000234911
		2773.5	0.000223792
		2775	0.000211886
		2776.5	0.000200024
		2778	0.000188897
		2779.5	0.000179007
		2781	0.000170645
		2782.5	0.000163935
		2784	0.000158884
		2785.5	0.000155457
		2787	0.000153657
		2788.5	0.000153583
		2790	0.000155453
		2791.5	0.000159582
		2793	0.000166295
		2794.5	0.000175789
		2796	0.00018797
		2797.5	0.000202301
		2799	0.000217737
		2800.5	0.000232758
		2802	0.000245582
		2803.5	0.000254464
		2805	0.000258063
		2806.5	0.000255742
		2808	0.00024774
		2809.5	0.000235105
		2811	0.000219474
		2812.5	0.00020271
		2814	0.00018652
		2815.5	0.000172157
		2817	0.000160259
		2818.5	0.000150857
		2820	0.000143498
		2821.5	0.000137437
		2823	0.000131859
		2824.5	0.00012603
		2826	0.000119416
		2827.5	0.000111731
		2829	0.000102932
		2830.5	9.31758e-05
		2832	8.27606e-05
		2833.5	7.20622e-05
		2835	6.14707e-05
		2836.5	5.13528e-05
		2838	4.20011e-05
		2839.5	3.36268e-05
		2841	2.63548e-05
		2842.5	2.02195e-05
		2844	1.51884e-05
		2845.5	1.1177e-05
		2847	8.06786e-06
		2848.5	5.7286e-06
		2850	4.02719e-06
		2851.5	2.84325e-06
		2853	2.07565e-06
		2854.5	1.64696e-06
		2856	1.50518e-06
		2857.5	1.62378e-06
		2859	2.00046e-06
		2860.5	2.65514e-06
		2862	3.62731e-06
		2863.5	4.97263e-06
		2865	6.75868e-06
		2866.5	9.05952e-06
		2868	1.19468e-05
		2869.5	1.54884e-05
		2871	1.97327e-05
		2872.5	2.47007e-05
		2874	3.03725e-05
		2875.5	3.6686e-05
		2877	4.35281e-05
		2878.5	5.07327e-05
		2880	5.80839e-05
		2881.5	6.53239e-05
		2883	7.21669e-05
		2884.5	7.83164e-05
		2886	8.34866e-05
		2887.5	8.74238e-05
		2889	8.99273e-05
		2890.5	9.08663e-05
		2892	9.01909e-05
		2893.5	8.79371e-05
		2895	8.4223e-05
		2896.5	7.92388e-05
		2898	7.3231e-05
		2899.5	6.64814e-05
		2901	5.92864e-05
		2902.5	5.19349e-05
		2904	4.46902e-05
		2905.5	3.77758e-05
		2907	3.13664e-05
		2908.5	2.55838e-05
		2910	2.04982e-05
		2911.5	1.61329e-05
		2913	1.24727e-05
		2914.5	9.47234e-06
		2916	7.06648e-06
		2917.5	5.17843e-06
		2919	3.72771e-06
		2920.5	2.63593e-06
		2922	1.83095e-06
		2923.5	1.2493e-06
		2925	8.37352e-07
		2926.5	5.51312e-07
		2928	3.56563e-07
		2929.5	2.26529e-07
		2931	1.41371e-07
		2932.5	8.66654e-08
		2934	5.21892e-08
		2935.5	3.0872e-08
		2937	1.7939e-08
		2938.5	1.02395e-08
		2940	5.74131e-09
		2941.5	3.16221e-09
		2943	0
		2944.5	0
		2946	0
		2947.5	0
		2949	0
		2950.5	0
		2952	0
		2953.5	0
		2955	0
		2956.5	0
		2958	0
		2959.5	0
		2961	0
		2962.5	0
		2964	0
		2965.5	0
		2967	0
		2968.5	0
		2970	0
		2971.5	0
		2973	0
		2974.5	0
		2976	0
		2977.5	0
		2979	0
		2980.5	0
		2982	0
		2983.5	0
		2985	0
		2986.5	0
		2988	0
		2989.5	0
		2991	0
		2992.5	0
		2994	0
		2995.5	0
		2997	0
		2998.5	0
[truncated: 1 more rows]
